# Supplementary material for: Assessing performance of pathogenicity predictors using clinically relevant variant datasets
Source: J Med Genet. 2020 Aug 25;58(8):547–55. doi: 10.1136/jmedgenet-2020-107003 (PMC8327323; doi:10.1136/jmedgenet-2020-107003)
Supplement: Supplementary data [file jmedgenet-2020-107003supp001.xlsx]

## Sheet: Supplemental_Table_S1 (1)
#Variant	GROUP	PATHOGENICITY	SIFT_SCORE	Polyphen-2_SCORE	REVEL_SCORE	CLINPRED_SCORE	GAVIN_PREDICTION
Chr1(GRCh37):g.1167764C>A	DDD	BENIGN	0.44	0.01	0.017	0.11	BENIGN
Chr1(GRCh37):g.1447798C>G	ACMG	PATHOGENIC	0.04	0.999	0.438	0.993	PATHOGENIC
Chr1(GRCh37):g.1454364C>T	ACMG	PATHOGENIC	0	0.995	0.337	0.995	PATHOGENIC
Chr1(GRCh37):g.6488328C>T	DDD	BENIGN	0.01	0.999	0.448	0.443	Pathogenic
Chr1(GRCh37):g.7724372A>G	DDD	BENIGN	0.49	0.891	0.171	0.941	PATHOGENIC
Chr1(GRCh37):g.7797375C>T	DDD	PATHOGENIC	0	0.982	0.276	0.993	PATHOGENIC
Chr1(GRCh37):g.8418780T>C	DDD	BENIGN	0.05	0.997	0.482	0.928	PATHOGENIC
Chr1(GRCh37):g.17322634C>T	DDD	BENIGN	0.05	0.941	0.723	0.857	Pathogenic
Chr1(GRCh37):g.17331930C>T	DDD	BENIGN	0.05	0.174	0.092	0.562	Pathogenic
Chr1(GRCh37):g.17349180G>A	ACMG	PATHOGENIC	0	0.999	0.967	1	Pathogenic
Chr1(GRCh37):g.17354297A>G	ACMG	BENIGN	0.96	0	0.439	0.025	Benign
Chr1(GRCh37):g.19566436A>C	DDD	BENIGN	0.01	0.289	0.203	0.786	BENIGN
Chr1(GRCh37):g.22176643G>A	DDD	BENIGN	0.01	0.612	0.228	0.085	Benign
Chr1(GRCh37):g.22191529C>T	Amish	BENIGN	0	0.998	0.544	0.932	Pathogenic
Chr1(GRCh37):g.22446586C>A	DDD	BENIGN	0	0.997	0.944	0.999	PATHOGENIC
Chr1(GRCh37):g.22456192T>A	DDD	BENIGN	0	0.996	0.96	0.996	PATHOGENIC
Chr1(GRCh37):g.27087348A>C	DDD	BENIGN	0	0.994	0.356	0.979	BENIGN
Chr1(GRCh37):g.27087452C>T	DDD	BENIGN	0	0.162	0.204	0.963	PATHOGENIC
Chr1(GRCh37):g.27089742G>A	DDD	BENIGN	0.28	0.248	0.296	0.042	Benign
Chr1(GRCh37):g.27094442C>A	DDD	PATHOGENIC	0	0.996	0.737	0.991	PATHOGENIC
Chr1(GRCh37):g.27094477G>T	DDD	PATHOGENIC	0	1	0.925	0.999	PATHOGENIC
Chr1(GRCh37):g.27094490G>C	DDD	PATHOGENIC	0	0.991	0.402	0.976	BENIGN
Chr1(GRCh37):g.27105521G>C	DDD	BENIGN	0.02	0.443	0.307	0.987	PATHOGENIC
Chr1(GRCh37):g.33478888C>T	Amish	BENIGN	0.02	0.905	0.817	0.885	Pathogenic
Chr1(GRCh37):g.35250514T>G	DDD	BENIGN	0	0.997	0.98	0.998	Pathogenic
Chr1(GRCh37):g.38003443T>C	Amish	BENIGN	0.001	0.999	0.465	0.981	PATHOGENIC
Chr1(GRCh37):g.40767005C>T	DDD	BENIGN	0.04	0.956	0.495	0.621	Pathogenic
Chr1(GRCh37):g.40769511C>T	DDD	BENIGN	0	0.994	0.952	0.999	PATHOGENIC
Chr1(GRCh37):g.43395280A>G	DDD	PATHOGENIC	0	0.736	0.916	0.996	PATHOGENIC
Chr1(GRCh37):g.43396766C>G	DDD	PATHOGENIC	0	1	0.913	1	PATHOGENIC
Chr1(GRCh37):g.43408904G>A	DDD	PATHOGENIC	0	0.991	0.91	1	PATHOGENIC
Chr1(GRCh37):g.44365250G>A	DDD	PATHOGENIC	0	1	0.618	1	PATHOGENIC
Chr1(GRCh37):g.46657819C>T	ACMG	PATHOGENIC	0	0.986	0.876	1	Pathogenic
Chr1(GRCh37):g.47882750G>A	DDD	BENIGN	0.47	0.031	0.232	0.108	PATHOGENIC
Chr1(GRCh37):g.52863470C>A	DDD	PATHOGENIC	0.48	0.005	0.06	0.048	Benign
Chr1(GRCh37):g.64102058C>T	DDD	BENIGN	0	0.979	0.362	0.349	Benign
Chr1(GRCh37):g.65851423G>A	Amish	BENIGN	0.01	0.067	0.316	0.088	Benign
Chr1(GRCh37):g.67516182G>A	ACMG	PATHOGENIC	0.01	0.958	0.766	1	PATHOGENIC
Chr1(GRCh37):g.95492779C>T	ACMG	PATHOGENIC	0	0.999	0.737	0.996	Pathogenic
Chr1(GRCh37):g.103356035T>C	DDD	BENIGN	0.18	0.67	0.546	0.851	PATHOGENIC
Chr1(GRCh37):g.103363715C>T	DDD	BENIGN	0	1	0.991	1	PATHOGENIC
Chr1(GRCh37):g.103427786A>T	DDD	PATHOGENIC	0.32	0.172	0.508	0.523	PATHOGENIC
Chr1(GRCh37):g.103461556G>A	DDD	BENIGN	0	0.993	0.872	0.965	Benign
Chr1(GRCh37):g.103480144A>G	DDD	BENIGN	0.02	0.275	0.328	0.91	PATHOGENIC
Chr1(GRCh37):g.110125116T>A	DDD	BENIGN	0.02	0.997	0.755	0.999	PATHOGENIC
Chr1(GRCh37):g.110173375T>C	ACMG	PATHOGENIC	0	0.996	0.958	0.984	Pathogenic
Chr1(GRCh37):g.110709726G>A	Amish	BENIGN	0.33	0.001	0.138	0.212	Pathogenic
Chr1(GRCh37):g.115258748C>G	DDD	PATHOGENIC	0.03	0.538	0.713	0.996	PATHOGENIC
Chr1(GRCh37):g.120458270G>C	ACMG	BENIGN	0.19	0.001	0.154	0.003	Benign
Chr1(GRCh37):g.120458716A>C	DDD	BENIGN	0.01	0.908	0.486	0.912	PATHOGENIC
Chr1(GRCh37):g.120462884A>G	DDD	BENIGN	1	0	0.191	0.376	BENIGN
Chr1(GRCh37):g.120462972G>A	DDD	BENIGN	0	0.999	0.61	0.999	PATHOGENIC
Chr1(GRCh37):g.120512166G>A	DDD	BENIGN	0.02	0.01	0.513	0.986	PATHOGENIC
Chr1(GRCh37):g.147380219G>C	DDD	PATHOGENIC	0	1	0.922	0.998	PATHOGENIC
Chr1(GRCh37):g.147380372T>G	DDD	PATHOGENIC	0	0.882	0.847	0.994	PATHOGENIC
Chr1(GRCh37):g.149897738C>A	DDD	BENIGN	0.3	0.019	0.135	0.827	PATHOGENIC
Chr1(GRCh37):g.149897886G>A	DDD	BENIGN	0.1	0.001	0.13	0.913	PATHOGENIC
Chr1(GRCh37):g.154557440T>C	DDD	BENIGN	0.1	0.994	0.376	0.533	PATHOGENIC
Chr1(GRCh37):g.154560703C>T	DDD	BENIGN	0	1	0.623	0.989	PATHOGENIC
Chr1(GRCh37):g.154569299C>T	DDD	BENIGN	0	1	0.889	0.999	PATHOGENIC
Chr1(GRCh37):g.154570340C>T	DDD	BENIGN	0.12	0.992	0.339	0.704	Pathogenic
Chr1(GRCh37):g.154574446G>T	DDD	BENIGN	0.59	0.003	0.083	0.149	BENIGN
Chr1(GRCh37):g.154574589A>G	DDD	BENIGN	0.01	0.999	0.538	0.996	PATHOGENIC
Chr1(GRCh37):g.155874530C>T	DDD	PATHOGENIC	0.04	0.967	0.857	0.995	PATHOGENIC
Chr1(GRCh37):g.156084974C>T	ACMG	PATHOGENIC	0	0.996	0.907	1	Pathogenic
Chr1(GRCh37):g.156105704G>A	ACMG	PATHOGENIC	0.03	0.933	0.873	0.971	Pathogenic
Chr1(GRCh37):g.156105801G>A	ACMG	PATHOGENIC	0.15	0.67	0.752	0.967	PATHOGENIC
Chr1(GRCh37):g.161298256C>T	ACMG	PATHOGENIC	0	0.995	0.976	0.998	Pathogenic
Chr1(GRCh37):g.168262475G>A	ACMG	PATHOGENIC	0	0.8	0.927	0.993	PATHOGENIC
Chr1(GRCh37):g.169437449A>G	ACMG	PATHOGENIC	0	0.999	0.911	0.999	PATHOGENIC
Chr1(GRCh37):g.169437891G>C	ACMG	PATHOGENIC	0	1	0.927	0.994	Pathogenic
Chr1(GRCh37):g.180217458G>A	DDD	BENIGN	0	0.997	0.745	0.994	PATHOGENIC
Chr1(GRCh37):g.196434492C>G	ACMG	PATHOGENIC	0	0.249	0.482	0.997	PATHOGENIC
Chr1(GRCh37):g.197073447C>A	DDD	BENIGN	0.02	0.997	0.345	0.949	PATHOGENIC
Chr1(GRCh37):g.210977491T>C	DDD	PATHOGENIC	0.03	0.923	0.878	0.966	Pathogenic
Chr1(GRCh37):g.211093309G>C	DDD	PATHOGENIC	0	0.999	0.758	0.977	Pathogenic
Chr1(GRCh37):g.211093374C>T	DDD	PATHOGENIC	0.01	0.972	0.872	0.999	Pathogenic
Chr1(GRCh37):g.214820558C>A	Amish	BENIGN	0.1	0.059	0.032	0.038	Benign
Chr1(GRCh37):g.218609453G>A	DDD	PATHOGENIC	0	1	0.569	0.994	PATHOGENIC
Chr1(GRCh37):g.220364620C>T	DDD	PATHOGENIC	0	1	0.797	0.891	Pathogenic
Chr1(GRCh37):g.220375711C>G	DDD	PATHOGENIC	0	0.992	0.426	0.887	Pathogenic
Chr1(GRCh37):g.235866186C>T	DDD	BENIGN	0	0.965	0.653	0.158	Benign
Chr1(GRCh37):g.235920658C>T	DDD	BENIGN	0.02	0.975	0.233	0.467	Benign
Chr1(GRCh37):g.236966848G>A	DDD	BENIGN	0.01	0.265	0.137	0.11	Benign
Chr1(GRCh37):g.243668598G>A	DDD	PATHOGENIC	0	0.931	0.402	0.984	PATHOGENIC
Chr1(GRCh37):g.244218467G>A	DDD	PATHOGENIC	0	0.991	0.44	0.955	PATHOGENIC
Chr1(GRCh37):g.245027192C>T	DDD	BENIGN	0.03	0.003	0.076	0.666	BENIGN
Chr2(GRCh37):g.1652660G>C	Amish	BENIGN	0.03	0.171	0.105	0.676	Benign
Chr2(GRCh37):g.1915795C>T	ACMG	PATHOGENIC	0	0.973	0.42	0.995	Pathogenic
Chr2(GRCh37):g.5833005G>T	DDD	PATHOGENIC	0	0.994	0.951	0.998	PATHOGENIC
Chr2(GRCh37):g.5833178C>T	ACMG	PATHOGENIC	0	0.997	0.826	0.997	PATHOGENIC
Chr2(GRCh37):g.16085972G>A	DDD	PATHOGENIC	0	1	0.901	1	PATHOGENIC
Chr2(GRCh37):g.16086005G>T	DDD	PATHOGENIC	0	0.999	0.968	0.999	PATHOGENIC
Chr2(GRCh37):g.20212373G>A	DDD	BENIGN	0.18	0	0.153	0.087	PATHOGENIC
Chr2(GRCh37):g.25470582C>T	DDD	PATHOGENIC	0	0.999	0.887	0.998	PATHOGENIC
Chr2(GRCh37):g.26705283C>T	Amish	BENIGN	0	0.999	0.771	0.967	Pathogenic
Chr2(GRCh37):g.27667370A>G	DDD	PATHOGENIC	0	0.648	0.6	0.899	Pathogenic
Chr2(GRCh37):g.39237753T>C	DDD	BENIGN	0	0.194	0.426	0.973	PATHOGENIC
Chr2(GRCh37):g.39239458G>C	DDD	PATHOGENIC	0	0.999	0.403	0.907	PATHOGENIC
Chr2(GRCh37):g.39249913C>A	DDD	PATHOGENIC	0	0.998	0.863	0.995	PATHOGENIC
Chr2(GRCh37):g.39250259A>G	DDD	PATHOGENIC	0	0.825	0.922	0.985	PATHOGENIC
Chr2(GRCh37):g.39251197C>A	DDD	BENIGN	0.02	0.879	0.249	0.851	PATHOGENIC
Chr2(GRCh37):g.39283845T>C	DDD	PATHOGENIC	0.02	0.995	0.879	0.931	PATHOGENIC
Chr2(GRCh37):g.45170000T>A	DDD	PATHOGENIC	0	1	0.94	1	PATHOGENIC
Chr2(GRCh37):g.47300953T>C	ACMG	PATHOGENIC	0	1	0.858	0.996	Pathogenic
Chr2(GRCh37):g.50724636T>G	DDD	BENIGN	0	0.692	0.884	0.966	Pathogenic
Chr2(GRCh37):g.50733693G>A	DDD	BENIGN	0	0.992	0.867	0.793	Benign
Chr2(GRCh37):g.55874556C>G	DDD	PATHOGENIC	0	0.999	0.629	0.998	PATHOGENIC
Chr2(GRCh37):g.60773293G>T	DDD	PATHOGENIC	0	1	0.83	0.994	PATHOGENIC
Chr2(GRCh37):g.60773348C>A	DDD	PATHOGENIC	0	1	0.947	0.993	PATHOGENIC
Chr2(GRCh37):g.60773352T>G	DDD	PATHOGENIC	0	1	0.596	0.993	PATHOGENIC
Chr2(GRCh37):g.74140753G>T	ACMG	PATHOGENIC	0	0.939	0.93	0.999	PATHOGENIC
Chr2(GRCh37):g.86073646C>T	DDD	PATHOGENIC	0	1	0.927	1	PATHOGENIC
Chr2(GRCh37):g.88870397C>G	ACMG	PATHOGENIC	0	1	0.631	0.993	PATHOGENIC
Chr2(GRCh37):g.88876193C>T	ACMG	PATHOGENIC	0	0.996	0.715	0.999	Benign
Chr2(GRCh37):g.113984789T>C	DDD	BENIGN	1	0.768	0.145	0.946	BENIGN
Chr2(GRCh37):g.113999587T>C	DDD	BENIGN	0.05	0.984	0.536	0.98	PATHOGENIC
Chr2(GRCh37):g.114000347C>T	DDD	PATHOGENIC	0	0.987	0.937	0.997	PATHOGENIC
Chr2(GRCh37):g.121708956G>A	DDD	BENIGN	0	0.991	0.372	0.923	Pathogenic
Chr2(GRCh37):g.121740302G>A	ACMG	PATHOGENIC	0	0.999	0.91	1	PATHOGENIC
Chr2(GRCh37):g.121746008C>A	DDD	BENIGN	0.35	0.343	0.301	0.977	PATHOGENIC
Chr2(GRCh37):g.136575350T>C	Amish	BENIGN	0.129	0.003	0.029	0.057	BENIGN
Chr2(GRCh37):g.136575351G>T	Amish	BENIGN	0.237	0.005	0.082	0.054	BENIGN
Chr2(GRCh37):g.136664912G>C	DDD	BENIGN	0	1	0.908	0.992	Pathogenic
Chr2(GRCh37):g.136690381C>T	DDD	BENIGN	0.04	0.447	0.393	0.988	PATHOGENIC
Chr2(GRCh37):g.145147451G>A	DDD	PATHOGENIC	0	0.968	0.441	0.986	PATHOGENIC
Chr2(GRCh37):g.145147463G>A	DDD	PATHOGENIC	0	0.968	0.462	0.973	PATHOGENIC
Chr2(GRCh37):g.145147475C>G	DDD	PATHOGENIC	0	0.998	0.52	0.992	PATHOGENIC
Chr2(GRCh37):g.145153999C>T	DDD	PATHOGENIC	0	0.992	0.381	0.997	PATHOGENIC
Chr2(GRCh37):g.145158777C>T	DDD	BENIGN	0	0.979	0.588	0.997	PATHOGENIC
Chr2(GRCh37):g.163124003A>G	DDD	BENIGN	0	1	0.879	0.999	PATHOGENIC
Chr2(GRCh37):g.163174574C>T	DDD	BENIGN	0	0.921	0.137	0.985	PATHOGENIC
Chr2(GRCh37):g.165986748A>G	DDD	PATHOGENIC	0	1	0.976	0.999	Pathogenic
Chr2(GRCh37):g.166165214T>G	DDD	PATHOGENIC	0	0.924	0.905	0.997	PATHOGENIC
Chr2(GRCh37):g.166210714T>C	DDD	PATHOGENIC	0	0.578	0.974	0.997	PATHOGENIC
Chr2(GRCh37):g.166243484T>A	DDD	PATHOGENIC	0	0.932	0.968	1	PATHOGENIC
Chr2(GRCh37):g.166245300A>G	ACMG	PATHOGENIC	0.01	0.728	0.928	0.999	PATHOGENIC
Chr2(GRCh37):g.166245954G>A	DDD	PATHOGENIC	0	0.989	0.91	0.996	PATHOGENIC
Chr2(GRCh37):g.166848020A>C	DDD	PATHOGENIC	0	0.987	0.979	0.996	PATHOGENIC
Chr2(GRCh37):g.166850880A>G	DDD	BENIGN	0	0.971	0.982	0.999	Pathogenic
Chr2(GRCh37):g.166859232G>A	DDD	PATHOGENIC	0	1	0.962	1	PATHOGENIC
Chr2(GRCh37):g.166894552T>A	DDD	PATHOGENIC	0.02	0.897	0.838	0.991	PATHOGENIC
Chr2(GRCh37):g.166904161G>T	DDD	PATHOGENIC	0	0.997	0.942	0.992	PATHOGENIC
Chr2(GRCh37):g.166908329C>A	DDD	PATHOGENIC	0.33	0.285	0.577	0.449	PATHOGENIC
Chr2(GRCh37):g.166909379G>A	DDD	PATHOGENIC	0	0.999	0.917	0.999	PATHOGENIC
Chr2(GRCh37):g.170068598C>T	DDD	PATHOGENIC	0.14	0.997	0.561	0.126	Pathogenic
Chr2(GRCh37):g.170103472G>A	DDD	PATHOGENIC	0.06	0.915	0.521	0.05	Benign
Chr2(GRCh37):g.176959346G>A	DDD	BENIGN	0	0.88	0.644	0.993	PATHOGENIC
Chr2(GRCh37):g.189872254G>A	ACMG	PATHOGENIC	0	1	0.995	1	Pathogenic
Chr2(GRCh37):g.189873933C>G	DDD	BENIGN	0	0.943	0.664	0.99	Pathogenic
Chr2(GRCh37):g.200137328G>A	DDD	PATHOGENIC	0.35	0	0.043	0.283	BENIGN
Chr2(GRCh37):g.200173527C>T	DDD	PATHOGENIC	0.09	0.602	0.222	0.95	PATHOGENIC
Chr2(GRCh37):g.200173556T>G	DDD	PATHOGENIC	0	1	0.508	0.998	PATHOGENIC
Chr2(GRCh37):g.200173680C>T	DDD	PATHOGENIC	0	0.996	0.589	0.998	PATHOGENIC
Chr2(GRCh37):g.200193603C>T	DDD	PATHOGENIC	0.02	0.999	0.365	0.968	PATHOGENIC
Chr2(GRCh37):g.200193611C>T	DDD	PATHOGENIC	0	1	0.39	0.988	PATHOGENIC
Chr2(GRCh37):g.200193626A>G	DDD	PATHOGENIC	0	0.992	0.735	0.992	PATHOGENIC
Chr2(GRCh37):g.200213431C>A	DDD	PATHOGENIC	0	0.972	0.652	0.997	PATHOGENIC
Chr2(GRCh37):g.200213440G>A	DDD	PATHOGENIC	0.01	0.988	0.342	0.974	PATHOGENIC
Chr2(GRCh37):g.206988991C>T	ACMG	PATHOGENIC	0	0.956	0.736	0.956	Pathogenic
Chr2(GRCh37):g.208993055G>A	DDD	BENIGN	0.95	0.224	0.276	0.782	PATHOGENIC
Chr2(GRCh37):g.211507250G>A	DDD	PATHOGENIC	0	0.997	0.824	1	PATHOGENIC
Chr2(GRCh37):g.216289934G>A	DDD	BENIGN	0.04	0.595	0.151	0.738	PATHOGENIC
Chr2(GRCh37):g.216296633G>A	DDD	BENIGN	0.04	0.999	0.468	0.991	PATHOGENIC
Chr2(GRCh37):g.216298095A>G	DDD	PATHOGENIC	0	0.997	0.922	0.998	PATHOGENIC
Chr2(GRCh37):g.216299436C>T	DDD	PATHOGENIC	0	0.997	0.896	0.997	PATHOGENIC
Chr2(GRCh37):g.219920267G>T	DDD	BENIGN	0.21	0.961	0.828	0.993	PATHOGENIC
Chr2(GRCh37):g.220431609C>G	DDD	PATHOGENIC	0	1	0.242	0.676	Pathogenic
Chr2(GRCh37):g.220432614C>T	DDD	BENIGN	0.01	0.628	0.277	0.459	BENIGN
Chr2(GRCh37):g.220432804G>A	DDD	PATHOGENIC	0.03	0.999	0.326	0.105	Pathogenic
Chr2(GRCh37):g.223086091G>A	DDD	PATHOGENIC	0	0.989	0.935	0.99	PATHOGENIC
Chr2(GRCh37):g.223161776C>G	DDD	PATHOGENIC	0	0.996	0.954	1	PATHOGENIC
Chr2(GRCh37):g.228104887G>A	DDD	BENIGN	0	1	0.923	0.999	PATHOGENIC
Chr2(GRCh37):g.228110697G>A	DDD	PATHOGENIC	0	1	0.896	0.996	PATHOGENIC
Chr2(GRCh37):g.228149003T>A	DDD	BENIGN	0.53	0.001	0.194	0.034	BENIGN
Chr2(GRCh37):g.233350870A>G	ACMG	PATHOGENIC	0	0.202	0.842	0.892	Pathogenic
Chr2(GRCh37):g.238244924G>A	DDD	BENIGN	0.08	0.099	0.231	0.008	Benign
Chr2(GRCh37):g.238287828C>T	DDD	BENIGN	0.11	0.048	0.176	0.165	Pathogenic
Chr2(GRCh37):g.238296390C>T	DDD	BENIGN	0.09	0.233	0.285	0.536	Pathogenic
Chr2(GRCh37):g.239757283T>A	DDD	BENIGN	0	0.969	0.932	0.996	PATHOGENIC
Chr2(GRCh37):g.239975207G>T	DDD	PATHOGENIC	0	0.933	0.509	0.997	PATHOGENIC
Chr2(GRCh37):g.240003811C>T	DDD	BENIGN	0.01	1	0.892	0.999	PATHOGENIC
Chr2(GRCh37):g.240033282C>T	DDD	BENIGN	0.05	0.973	0.244	0.988	PATHOGENIC
Chr2(GRCh37):g.240036937G>A	DDD	PATHOGENIC	0.08	0.983	0.197	0.939	Pathogenic
Chr2(GRCh37):g.240066404T>C	DDD	PATHOGENIC	0	0.999	0.418	0.997	PATHOGENIC
Chr2(GRCh37):g.241682369C>A	DDD	BENIGN	0.26	0.036	0.284	0.957	PATHOGENIC
Chr2(GRCh37):g.241712671T>C	DDD	PATHOGENIC	0	1	0.931	1	PATHOGENIC
Chr2(GRCh37):g.241715306C>G	DDD	PATHOGENIC	0	0.996	0.931	0.998	PATHOGENIC
Chr2(GRCh37):g.241715309T>C	ACMG	PATHOGENIC	0	1	0.926	1	PATHOGENIC
Chr2(GRCh37):g.241715312G>A	DDD	PATHOGENIC	0	0.998	0.934	1	PATHOGENIC
Chr2(GRCh37):g.241722511T>C	ACMG	PATHOGENIC	0	0.46	0.796	0.996	PATHOGENIC
Chr2(GRCh37):g.241723194G>A	DDD	PATHOGENIC	0	0.979	0.813	0.998	PATHOGENIC
Chr2(GRCh37):g.241723194G>A	ACMG	PATHOGENIC	0	0.967	0.813	0.998487	Pathogenic
Chr2(GRCh37):g.241724479C>T	DDD	PATHOGENIC	0	1	0.959	1	PATHOGENIC
Chr2(GRCh37):g.241724480G>A	DDD	PATHOGENIC	0	1	0.958	1	Pathogenic
Chr2(GRCh37):g.241727535G>A	DDD	PATHOGENIC	0	1	0.933	1	Pathogenic
Chr2(GRCh37):g.241737138C>T	DDD	PATHOGENIC	0	1	0.969	1	PATHOGENIC
Chr3(GRCh37):g.4685875A>T	DDD	BENIGN	0.02	0.759	0.871	0.993	PATHOGENIC
Chr3(GRCh37):g.4687356A>G	DDD	PATHOGENIC	0	0.994	0.841	0.971	PATHOGENIC
Chr3(GRCh37):g.4687362C>T	DDD	PATHOGENIC	0	1	0.718	0.997	PATHOGENIC
Chr3(GRCh37):g.4706967A>G	DDD	PATHOGENIC	0	0.992	0.884	0.999	PATHOGENIC
Chr3(GRCh37):g.4709160C>T	DDD	PATHOGENIC	0	0.999	0.845	0.995	PATHOGENIC
Chr3(GRCh37):g.4712517G>C	Amish	BENIGN	0.31	0.005	0.346	0.038	Benign
Chr3(GRCh37):g.4718311G>A	DDD	BENIGN	0.33	0.005	0.543	0.821	PATHOGENIC
Chr3(GRCh37):g.4735387A>G	DDD	BENIGN	0.32	0.872	0.546	0.728	Pathogenic
Chr3(GRCh37):g.4744601G>A	DDD	BENIGN	0.02	0.756	0.509	0.973	PATHOGENIC
Chr3(GRCh37):g.4747877G>A	DDD	PATHOGENIC	0.41	0.085	0.377	0.962	PATHOGENIC
Chr3(GRCh37):g.4753512T>C	DDD	PATHOGENIC	0	0.988	0.915	0.995	PATHOGENIC
Chr3(GRCh37):g.4842199T>C	DDD	BENIGN	0.02	0.219	0.907	0.973	PATHOGENIC
Chr3(GRCh37):g.4856181G>A	DDD	PATHOGENIC	0.01	0.861	0.702	0.891	PATHOGENIC
Chr3(GRCh37):g.4856205G>A	DDD	PATHOGENIC	0	1	0.965	0.999	Pathogenic
Chr3(GRCh37):g.4856205G>C	DDD	PATHOGENIC	0	0.999	0.963	0.999	PATHOGENIC
Chr3(GRCh37):g.4856807A>C	DDD	PATHOGENIC	0	1	0.944	0.988	PATHOGENIC
Chr3(GRCh37):g.10130580A>G	DDD	BENIGN	0	0.993	0.482	0.99	PATHOGENIC
Chr3(GRCh37):g.10183771T>G	ACMG	PATHOGENIC	0	0.97	0.744	0.991	PATHOGENIC
Chr3(GRCh37):g.10191489G>A	ACMG	PATHOGENIC	0.03	0.997	0.797	0.993	Pathogenic
Chr3(GRCh37):g.10191569C>G	ACMG	PATHOGENIC	0	0.989	0.796	0.566	Pathogenic
Chr3(GRCh37):g.11067522G>A	DDD	PATHOGENIC	0.03	1	0.725	0.997	PATHOGENIC
Chr3(GRCh37):g.12458335G>A	ACMG	PATHOGENIC	0.01	0.902	0.534	0.954	Pathogenic
Chr3(GRCh37):g.15529792T>C	Amish	BENIGN	0.17	0.482	0.384	0.366	Pathogenic
Chr3(GRCh37):g.25622103A>C	ACMG	PATHOGENIC	0.01	0.991	0.975	0.996	PATHOGENIC
Chr3(GRCh37):g.46939899C>T	DDD	BENIGN	0	1	0.639	0.997	PATHOGENIC
Chr3(GRCh37):g.46942565G>A	DDD	BENIGN	0.01	0.857	0.15	0.979	PATHOGENIC
Chr3(GRCh37):g.47161876C>A	Amish	BENIGN	0	0.998	0.566	0.979	BENIGN
Chr3(GRCh37):g.52183311C>A	DDD	PATHOGENIC	0	1	0.915	1	PATHOGENIC
Chr3(GRCh37):g.53531364C>T	DDD	BENIGN	0	0.992	0.286	0.987	Pathogenic
Chr3(GRCh37):g.53700513C>G	DDD	BENIGN	0.01	0.999	0.914	0.994	PATHOGENIC
Chr3(GRCh37):g.55504271C>T	DDD	BENIGN	0.03	1	0.793	0.992	PATHOGENIC
Chr3(GRCh37):g.55508583C>G	DDD	BENIGN	0.4	0.857	0.364	0.957	PATHOGENIC
Chr3(GRCh37):g.58089793G>A	DDD	BENIGN	0	0.9	0.77	0.999	PATHOGENIC
Chr3(GRCh37):g.58094981G>A	DDD	BENIGN	0.06	0.285	0.276	0.265	BENIGN
Chr3(GRCh37):g.58118535G>T	DDD	PATHOGENIC	0	0.999	0.909	0.997	PATHOGENIC
Chr3(GRCh37):g.69788770G>A	DDD	BENIGN	0	0.02	0.24	0.972	PATHOGENIC
Chr3(GRCh37):g.69998235G>A	DDD	BENIGN	0.03	0.726	0.151	0.826	PATHOGENIC
Chr3(GRCh37):g.70014139G>C	DDD	BENIGN	0.08	0.085	0.254	0.851	PATHOGENIC
Chr3(GRCh37):g.71021763G>T	DDD	PATHOGENIC	0	0.983	0.84	0.997	BENIGN
Chr3(GRCh37):g.71021817C>T	DDD	PATHOGENIC	0	0.999	0.943	1	BENIGN
Chr3(GRCh37):g.71026125A>T	DDD	PATHOGENIC	0	0.999	0.922	0.998	PATHOGENIC
Chr3(GRCh37):g.71026816G>A	DDD	PATHOGENIC	0	0.999	0.814	1	PATHOGENIC
Chr3(GRCh37):g.71026825G>A	DDD	PATHOGENIC	0	1	0.885	1	PATHOGENIC
Chr3(GRCh37):g.119087277A>C	DDD	BENIGN	0	0.415	0.369	0.94	PATHOGENIC
Chr3(GRCh37):g.119134826C>G	DDD	BENIGN	0.2	0.152	0.135	0.716	PATHOGENIC
Chr3(GRCh37):g.121976155C>T	ACMG	PATHOGENIC	0.07	0.984	0.675	0.947	Pathogenic
Chr3(GRCh37):g.121976230C>G	ACMG	PATHOGENIC	0	0.939	0.958	0.999	PATHOGENIC
Chr3(GRCh37):g.121980436G>T	ACMG	PATHOGENIC	0	0.999	0.95	1	PATHOGENIC
Chr3(GRCh37):g.121980459C>A	ACMG	PATHOGENIC	0	0.987	0.913	0.999	PATHOGENIC
Chr3(GRCh37):g.121980562G>A	ACMG	PATHOGENIC	0.75	0.04	0.545	0.656	Pathogenic
Chr3(GRCh37):g.121980630G>A	ACMG	BENIGN	0.21	0	0.403	0.008	Benign
Chr3(GRCh37):g.121980772A>C	ACMG	PATHOGENIC	0	0.997	0.939	0.994	PATHOGENIC
Chr3(GRCh37):g.121981065T>C	ACMG	PATHOGENIC	0	0.999	0.919	1	Pathogenic
Chr3(GRCh37):g.121981170G>A	ACMG	PATHOGENIC	0	0.999	0.903	0.993	PATHOGENIC
Chr3(GRCh37):g.121981257C>A	ACMG	PATHOGENIC	0	0.987	0.874	0.991	PATHOGENIC
Chr3(GRCh37):g.121994674C>T	ACMG	PATHOGENIC	0	0.995	0.763	0.987	Pathogenic
Chr3(GRCh37):g.122000982G>A	ACMG	BENIGN	0.06	0.065	0.337	0.015	Pathogenic
Chr3(GRCh37):g.122001015T>C	ACMG	PATHOGENIC	0.27	0.855	0.689	0.839	PATHOGENIC
Chr3(GRCh37):g.122001044T>C	ACMG	PATHOGENIC	0	0.899	0.955	0.986	PATHOGENIC
Chr3(GRCh37):g.122002720C>T	ACMG	PATHOGENIC	0	0.999	0.909	0.998	PATHOGENIC
Chr3(GRCh37):g.122002866G>A	ACMG	PATHOGENIC	0	0.986	0.784	0.988	Pathogenic
Chr3(GRCh37):g.122003044C>G	ACMG	PATHOGENIC	0	1	0.951	0.999	PATHOGENIC
Chr3(GRCh37):g.122003194C>T	ACMG	PATHOGENIC	0	0.999	0.909	1	Pathogenic
Chr3(GRCh37):g.122003226T>A	ACMG	PATHOGENIC	0	0.998	0.948	0.998	PATHOGENIC
Chr3(GRCh37):g.122003226T>G	ACMG	PATHOGENIC	0	0.998	0.927	0.996	PATHOGENIC
Chr3(GRCh37):g.122003268C>G	ACMG	PATHOGENIC	0	0.998	0.905	1	PATHOGENIC
Chr3(GRCh37):g.122003457C>G	ACMG	PATHOGENIC	0	0.334	0.661	0.953	PATHOGENIC
Chr3(GRCh37):g.128200067C>T	DDD	BENIGN	0.57	0.017	0.422	0.82	PATHOGENIC
Chr3(GRCh37):g.132395321A>G	ACMG	PATHOGENIC	0.13	0.003	0.321	0.466	PATHOGENIC
Chr3(GRCh37):g.132401603G>C	DDD	BENIGN	0.01	0.996	0.605	0.194	Pathogenic
Chr3(GRCh37):g.132401637A>G	DDD	BENIGN	0	1	0.874	0.837	Pathogenic
Chr3(GRCh37):g.133119346T>C	DDD	BENIGN	0	0.999	0.781	0.999	PATHOGENIC
Chr3(GRCh37):g.138665197C>A	DDD	BENIGN	0.01	0.925	0.834	0.994	PATHOGENIC
Chr3(GRCh37):g.138665300G>A	DDD	PATHOGENIC	0.01	0.906	0.961	0.991	PATHOGENIC
Chr3(GRCh37):g.170732309C>T	ACMG	PATHOGENIC	0	1	0.854	0.999	PATHOGENIC
Chr3(GRCh37):g.176750853T>C	DDD	PATHOGENIC	0	0.968	0.904	0.996	PATHOGENIC
Chr3(GRCh37):g.176755900C>A	DDD	PATHOGENIC	0	0.991	0.953	1	PATHOGENIC
Chr3(GRCh37):g.178916636G>A	DDD	PATHOGENIC	0.01	0.984	0.522	0.982	PATHOGENIC
Chr3(GRCh37):g.178921548G>A	DDD	PATHOGENIC	0	0.942	0.355	0.98	PATHOGENIC
Chr3(GRCh37):g.178922321G>A	ACMG	PATHOGENIC	0.27	0.221	0.605	0.855	PATHOGENIC
Chr3(GRCh37):g.178936082G>A	DDD	PATHOGENIC	0.04	0.912	0.439	0.88	PATHOGENIC
Chr3(GRCh37):g.178937404G>T	DDD	PATHOGENIC	0.04	0.143	0.444	0.974	PATHOGENIC
Chr3(GRCh37):g.178952048G>A	DDD	PATHOGENIC	0	0.999	0.811	0.996	PATHOGENIC
Chr3(GRCh37):g.181430372T>C	DDD	PATHOGENIC	0	0.999	0.905	0.999	PATHOGENIC
Chr3(GRCh37):g.181430404G>C	DDD	BENIGN	0.02	0.976	0.814	0.988	PATHOGENIC
Chr3(GRCh37):g.183963079C>T	ACMG	PATHOGENIC	0	1	0.959	0.998	Pathogenic
Chr3(GRCh37):g.189582169G>A	ACMG	PATHOGENIC	0	0.999	0.926	0.998	Pathogenic
Chr3(GRCh37):g.189585690C>G	ACMG	PATHOGENIC	0.01	0.991	0.808	0.997	PATHOGENIC
Chr3(GRCh37):g.189586416G>T	DDD	PATHOGENIC	0	0.997	0.94	0.999	PATHOGENIC
Chr3(GRCh37):g.189586422G>A	DDD	PATHOGENIC	0	1	0.948	0.997	PATHOGENIC
Chr4(GRCh37):g.1806119G>A	DDD	PATHOGENIC	0.14	0.637	0.696	0.892	PATHOGENIC
Chr4(GRCh37):g.1807371C>A	DDD	PATHOGENIC	0	1	0.693	0.998	PATHOGENIC
Chr4(GRCh37):g.1807371C>G	DDD	PATHOGENIC	0	1	0.693	0.998	PATHOGENIC
Chr4(GRCh37):g.6303363C>G	ACMG	BENIGN	0.38	0.015	0.237	0.038	Benign
Chr4(GRCh37):g.6303693C>T	ACMG	PATHOGENIC	0	1	0.948	0.988	Pathogenic
Chr4(GRCh37):g.26426358C>G	DDD	BENIGN	0	1	0.685	0.999	PATHOGENIC
Chr4(GRCh37):g.55155265C>T	ACMG	PATHOGENIC	0.15	0.935	0.486	0.876	PATHOGENIC
Chr4(GRCh37):g.79295312C>T	DDD	PATHOGENIC	0.01	0.772	0.422	0.119	Benign
Chr4(GRCh37):g.88535225T>C	DDD	BENIGN	0.01	0.96	0.312	0.533	PATHOGENIC
Chr4(GRCh37):g.88535848C>A	DDD	BENIGN	0	0.007	0.268	0.04	BENIGN
Chr4(GRCh37):g.111542367G>C	DDD	BENIGN	0	1	0.931	0.998	PATHOGENIC
Chr4(GRCh37):g.113568536G>T	DDD	PATHOGENIC	0.02	0.543	0.109	0.854	PATHOGENIC
Chr4(GRCh37):g.122765152T>C	DDD	PATHOGENIC	0.01	0.732	0.781	0.032	Benign
Chr4(GRCh37):g.126240408A>G	DDD	PATHOGENIC	0.89	0	0.071	0.149	BENIGN
Chr4(GRCh37):g.126373642G>A	DDD	PATHOGENIC	1	0.046	0.232	0.147	Pathogenic
Chr4(GRCh37):g.148461613C>A	DDD	BENIGN	0	0.978	0.651	0.987	PATHOGENIC
Chr5(GRCh37):g.233619C>T	ACMG	PATHOGENIC	0.01	1	0.578	0.983	PATHOGENIC
Chr5(GRCh37):g.233651A>C	ACMG	BENIGN	0.69	0.005	0.203	0.098	Pathogenic
Chr5(GRCh37):g.14397221C>A	DDD	PATHOGENIC	0	0.998	0.476	0.992	Pathogenic
Chr5(GRCh37):g.14397222C>T	DDD	PATHOGENIC	0	0.999	0.45	0.997	PATHOGENIC
Chr5(GRCh37):g.14758686T>C	DDD	BENIGN	0	0.998	0.951	0.973	PATHOGENIC
Chr5(GRCh37):g.14769290C>T	DDD	BENIGN	0.01	0.992	0.833	0.843	Pathogenic
Chr5(GRCh37):g.36986082C>T	DDD	BENIGN	0.41	0.139	0.375	0.332	BENIGN
Chr5(GRCh37):g.37022374G>A	DDD	PATHOGENIC	0.01	0.987	0.869	0.99	PATHOGENIC
Chr5(GRCh37):g.37024793G>A	DDD	PATHOGENIC	0	0.996	0.734	0.994	PATHOGENIC
Chr5(GRCh37):g.37038824T>C	DDD	PATHOGENIC	0	1	0.86	0.999	PATHOGENIC
Chr5(GRCh37):g.37045678A>C	DDD	BENIGN	0.07	0.204	0.553	0.581	PATHOGENIC
Chr5(GRCh37):g.37048661A>C	DDD	BENIGN	0	0.999	0.985	0.998	PATHOGENIC
Chr5(GRCh37):g.37051908A>G	DDD	BENIGN	0	0.988	0.875	0.996	PATHOGENIC
Chr5(GRCh37):g.45462046T>G	DDD	PATHOGENIC	0.02	0.086	0.78	0.967	PATHOGENIC
Chr5(GRCh37):g.56111875C>G	DDD	BENIGN	0.1	0.011	0.072	0.321	PATHOGENIC
Chr5(GRCh37):g.56178082C>T	DDD	BENIGN	0	0.796	0.293	0.758	PATHOGENIC
Chr5(GRCh37):g.58272245T>C	ACMG	PATHOGENIC	0	0.773	0.71	0.991	PATHOGENIC
Chr5(GRCh37):g.58289228A>G	DDD	PATHOGENIC	0.01	0.9	0.795	0.993	PATHOGENIC
Chr5(GRCh37):g.58489339G>A	DDD	PATHOGENIC	0	0.979	0.906	0.997	PATHOGENIC
Chr5(GRCh37):g.60831325G>T	DDD	BENIGN	0.02	0.997	0.555	0.992	PATHOGENIC
Chr5(GRCh37):g.67569242A>G	DDD	BENIGN	0.01	0.965	0.382	0.99	PATHOGENIC
Chr5(GRCh37):g.74698873T>G	DDD	BENIGN	0.01	0.958	0.199	0.99	PATHOGENIC
Chr5(GRCh37):g.74722257G>A	DDD	PATHOGENIC	0	0.998	0.607	0.998	PATHOGENIC
Chr5(GRCh37):g.76349847G>A	Amish	BENIGN	0.146	0.962	0.212	0.94	PATHOGENIC
Chr5(GRCh37):g.86564680C>T	DDD	BENIGN	0.27	0.143	0.223	0.171	Benign
Chr5(GRCh37):g.86675610T>C	DDD	BENIGN	0.01	0.998	0.682	0.976	PATHOGENIC
Chr5(GRCh37):g.88100565G>C	DDD	PATHOGENIC	0	0.999	0.847	0.999	PATHOGENIC
Chr5(GRCh37):g.88100576A>C	DDD	PATHOGENIC	0	1	0.861	1	PATHOGENIC
Chr5(GRCh37):g.88119562C>G	DDD	PATHOGENIC	0	0.999	0.876	0.996	PATHOGENIC
Chr5(GRCh37):g.90077350G>A	Amish	BENIGN	0	0.751	0.192	0.516	Pathogenic
Chr5(GRCh37):g.92921087T>G	DDD	PATHOGENIC	0.01	0.999	0.956	0.999	PATHOGENIC
Chr5(GRCh37):g.110096971G>A	ACMG	PATHOGENIC	0.06	0.536	0.613	0.334	Pathogenic
Chr5(GRCh37):g.118844890T>C	DDD	PATHOGENIC	0	0.992	0.801	0.986	PATHOGENIC
Chr5(GRCh37):g.125885933C>A	ACMG	PATHOGENIC	0	0.996	0.919	1	PATHOGENIC
Chr5(GRCh37):g.126667100T>G	ACMG	PATHOGENIC	0	0.993	0.907	0.998	PATHOGENIC
Chr5(GRCh37):g.127599291A>G	DDD	BENIGN	0.14	1	0.811	0.996	PATHOGENIC
Chr5(GRCh37):g.127609649A>G	DDD	PATHOGENIC	0	0.996	0.982	1	PATHOGENIC
Chr5(GRCh37):g.127622492C>A	DDD	BENIGN	0.01	0.437	0.749	0.963	PATHOGENIC
Chr5(GRCh37):g.127647601T>A	DDD	BENIGN	0	0.999	0.819	0.997	PATHOGENIC
Chr5(GRCh37):g.127668676A>G	ACMG	PATHOGENIC	0	0.996	0.975	0.999908	Pathogenic
Chr5(GRCh37):g.127873281T>C	DDD	BENIGN	0.24	0.092	0.469	0.262	BENIGN
Chr5(GRCh37):g.134364488G>A	DDD	BENIGN	0	0.959	0.742	0.96	PATHOGENIC
Chr5(GRCh37):g.136963994C>T	ACMG	PATHOGENIC	0.02	0.978	0.744	0.996	Pathogenic
Chr5(GRCh37):g.136973006C>T	ACMG	PATHOGENIC	0.18	1	0.429	0.98	Pathogenic
Chr5(GRCh37):g.139494382A>T	DDD	PATHOGENIC	0	1	0.846	0.992	Pathogenic
Chr5(GRCh37):g.149503858G>T	DDD	BENIGN	0	1	0.654	0.983	Pathogenic
Chr5(GRCh37):g.149755291C>G	DDD	BENIGN	0.2	0.97	0.239	0.424	PATHOGENIC
Chr5(GRCh37):g.149771115G>C	DDD	BENIGN	0	0.808	0.332	0.915	PATHOGENIC
Chr5(GRCh37):g.161318041G>C	DDD	PATHOGENIC	0	1	0.9	0.999	PATHOGENIC
Chr5(GRCh37):g.161322692A>C	DDD	PATHOGENIC	0.06	0.974	0.838	0.89	PATHOGENIC
Chr5(GRCh37):g.161322785G>C	DDD	BENIGN	0	0.903	0.884	0.987	PATHOGENIC
Chr5(GRCh37):g.161322788T>C	DDD	PATHOGENIC	0.03	0.996	0.936	0.997	PATHOGENIC
Chr5(GRCh37):g.161522557G>A	DDD	PATHOGENIC	1	0.325	0.313	0.961	PATHOGENIC
Chr5(GRCh37):g.161569244C>T	DDD	PATHOGENIC	0	0.994	0.981	0.999	Pathogenic
Chr5(GRCh37):g.174151754C>T	DDD	BENIGN	0.43	0.003	0.111	0.221	PATHOGENIC
Chr5(GRCh37):g.176696607T>G	DDD	PATHOGENIC	0	0.985	0.966	0.999	PATHOGENIC
Chr5(GRCh37):g.176710899G>T	DDD	PATHOGENIC	0.01	1	0.937	0.999	PATHOGENIC
Chr5(GRCh37):g.176715838A>G	DDD	BENIGN	0	0.505	0.739	0.978	PATHOGENIC
Chr5(GRCh37):g.176720974G>A	DDD	PATHOGENIC	0	0.999	0.83	1	Pathogenic
Chr5(GRCh37):g.177034310C>T	DDD	PATHOGENIC	0	1	0.681	0.999	Pathogenic
Chr5(GRCh37):g.177035541G>A	DDD	PATHOGENIC	0	0.664	0.846	0.74	Pathogenic
Chr5(GRCh37):g.177035995C>T	DDD	PATHOGENIC	0	0.872	0.475	0.879	Pathogenic
Chr5(GRCh37):g.180037000C>T	DDD	BENIGN	0.12	0.099	0.4	0.635	Pathogenic
Chr5(GRCh37):g.180038337G>T	DDD	BENIGN	0.08	0.168	0.312	0.888	PATHOGENIC
Chr5(GRCh37):g.180047659C>T	DDD	BENIGN	0	0.889	0.66	0.976	PATHOGENIC
Chr6(GRCh37):g.1610926C>G	ACMG	PATHOGENIC	0	0.999	0.967	0.998	Pathogenic
Chr6(GRCh37):g.1610945A>G	DDD	BENIGN	0	0.992	0.94	0.996	PATHOGENIC
Chr6(GRCh37):g.1611372G>A	DDD	BENIGN	0.05	0.984	0.47	0.928	PATHOGENIC
Chr6(GRCh37):g.1611696C>T	DDD	BENIGN	0.02	0.053	0.311	0.619	PATHOGENIC
Chr6(GRCh37):g.1611913C>G	DDD	BENIGN	0.01	0.284	0.253	0.918	PATHOGENIC
Chr6(GRCh37):g.1612152C>T	DDD	BENIGN	0	0.302	0.289	0.59	PATHOGENIC
Chr6(GRCh37):g.3155143C>T	ACMG	PATHOGENIC	0.02	0.999	0.916	0.998	PATHOGENIC
Chr6(GRCh37):g.10402841G>A	ACMG	PATHOGENIC	0	0.996	0.925	0.992899	Pathogenic
Chr6(GRCh37):g.10410379G>C	DDD	BENIGN	0.37	0.98	0.634	0.727	PATHOGENIC
Chr6(GRCh37):g.30691734A>G	DDD	PATHOGENIC	0.02	0.602	0.874	0.992	Pathogenic
Chr6(GRCh37):g.31933735T>A	ACMG	PATHOGENIC	0	0.624	0.747	0.996	PATHOGENIC
Chr6(GRCh37):g.33132114C>T	DDD	BENIGN	0.01	0.397	0.293	0.011	Benign
Chr6(GRCh37):g.33133527C>T	DDD	BENIGN	0.04	0.993	0.504	0.981	PATHOGENIC
Chr6(GRCh37):g.33136319G>T	DDD	BENIGN	0.02	0.871	0.73	0.97	PATHOGENIC
Chr6(GRCh37):g.33136784C>T	DDD	PATHOGENIC	0	0.999	0.975	0.998	PATHOGENIC
Chr6(GRCh37):g.33400558C>T	DDD	PATHOGENIC	0.04	0.513	0.15	0.76	PATHOGENIC
Chr6(GRCh37):g.33400583G>A	DDD	PATHOGENIC	0	0.342	0.221	0.945	Pathogenic
Chr6(GRCh37):g.33406311T>C	DDD	PATHOGENIC	0	0.998	0.362	0.972	PATHOGENIC
Chr6(GRCh37):g.33406340G>C	DDD	PATHOGENIC	0	1	0.415	0.998	PATHOGENIC
Chr6(GRCh37):g.33406648T>G	DDD	PATHOGENIC	0	0.999	0.739	0.999	PATHOGENIC
Chr6(GRCh37):g.33406672T>C	DDD	PATHOGENIC	0	1	0.953	0.999	PATHOGENIC
Chr6(GRCh37):g.33408534T>G	DDD	PATHOGENIC	0	0.995	0.874	0.995	PATHOGENIC
Chr6(GRCh37):g.42975003G>A	DDD	PATHOGENIC	0.02	0.976	0.571	0.998	Pathogenic
Chr6(GRCh37):g.42975013C>G	DDD	PATHOGENIC	0	0.948	0.606	0.999	Pathogenic
Chr6(GRCh37):g.43013025G>A	Amish	BENIGN	0.03	0.999	0.729	0.981	Pathogenic
Chr6(GRCh37):g.45296507A>G	DDD	BENIGN	0.01	0.885	0.655	0.94	PATHOGENIC
Chr6(GRCh37):g.45399672G>T	DDD	BENIGN	0	0.799	0.875	0.987	PATHOGENIC
Chr6(GRCh37):g.50791201C>A	DDD	BENIGN	0.04	0.992	0.799	0.996	PATHOGENIC
Chr6(GRCh37):g.50803972T>C	DDD	PATHOGENIC	0	0.998	0.975	0.997	PATHOGENIC
Chr6(GRCh37):g.70962012T>G	DDD	BENIGN	0.06	0.065	0.284	0.307	BENIGN
Chr6(GRCh37):g.70964891T>C	DDD	BENIGN	0.01	0.872	0.721	0.954	PATHOGENIC
Chr6(GRCh37):g.71010024C>T	DDD	BENIGN	0	0.879	0.5	0.921	PATHOGENIC
Chr6(GRCh37):g.71010084G>A	DDD	BENIGN	0.2	0.715	0.408	0.696	PATHOGENIC
Chr6(GRCh37):g.80631459T>C	ACMG	PATHOGENIC	0	1	0.838	0.999	PATHOGENIC
Chr6(GRCh37):g.88239290A>T	DDD	PATHOGENIC	0	0.998	0.832	0.996	PATHOGENIC
Chr6(GRCh37):g.116442824A>G	DDD	BENIGN	0.03	0.129	0.302	0.72	BENIGN
Chr6(GRCh37):g.121768184T>C	DDD	PATHOGENIC	0	0.43	0.923	0.99	PATHOGENIC
Chr6(GRCh37):g.121768247T>A	ACMG	PATHOGENIC	0	0.997	0.974	0.995	PATHOGENIC
Chr6(GRCh37):g.135754284C>T	DDD	PATHOGENIC	0	0.985	0.835	0.995	PATHOGENIC
Chr6(GRCh37):g.152623012C>T	DDD	BENIGN	0	0.719	0.155	0.193	Pathogenic
Chr6(GRCh37):g.152698005C>A	DDD	BENIGN	0.01	0.528	0.137	0.953	PATHOGENIC
Chr6(GRCh37):g.157099922C>T	DDD	BENIGN	0	0.658	0.083	0.492	BENIGN
Chr6(GRCh37):g.157100061G>C	DDD	BENIGN	0.16	0	0.018	0.194	BENIGN
Chr6(GRCh37):g.157431695G>A	DDD	PATHOGENIC	0.01	0.439	0.146	0.986	BENIGN
Chr6(GRCh37):g.157454286G>T	DDD	BENIGN	0	0.891	0.192	0.96	BENIGN
Chr6(GRCh37):g.157488230A>G	DDD	BENIGN	0	0.997	0.29	0.997	PATHOGENIC
Chr6(GRCh37):g.157527328G>A	DDD	BENIGN	0	0.994	0.622	0.982	PATHOGENIC
Chr6(GRCh37):g.157527680G>A	ACMG	BENIGN	0.09	0.355	0.271	0.614	Benign
Chr6(GRCh37):g.157528178A>C	DDD	PATHOGENIC	0	0.022	0.347	0.995	BENIGN
Chr7(GRCh37):g.5567395T>C	DDD	PATHOGENIC	0	0.902	0.95	0.993	PATHOGENIC
Chr7(GRCh37):g.5567480C>T	ACMG	PATHOGENIC	0.01	0.921	0.959	0.999	PATHOGENIC
Chr7(GRCh37):g.5568125C>T	DDD	PATHOGENIC	0	0.122	0.889	0.996	PATHOGENIC
Chr7(GRCh37):g.5568164C>A	DDD	PATHOGENIC	0.01	0.989	0.879	0.997	PATHOGENIC
Chr7(GRCh37):g.5568296G>C	DDD	PATHOGENIC	0	0.479	0.827	0.993	PATHOGENIC
Chr7(GRCh37):g.5569015A>G	DDD	PATHOGENIC	0.03	0.529	0.799	0.985	PATHOGENIC
Chr7(GRCh37):g.5569241C>T	DDD	BENIGN	0.07	0.038	0.472	0.948	PATHOGENIC
Chr7(GRCh37):g.21856224G>A	Amish	BENIGN	0	1	0.599	0.188	Benign
Chr7(GRCh37):g.27238052G>A	DDD	BENIGN	0.41	0.682	0.184	0.937	PATHOGENIC
Chr7(GRCh37):g.33384197C>T	DDD	BENIGN	0.04	0.949	0.277	0.032	Benign
Chr7(GRCh37):g.33397560C>T	DDD	BENIGN	0	0.396	0.287	0.028	Benign
Chr7(GRCh37):g.35242077G>T	DDD	BENIGN	0	0.953	0.545	0.933	PATHOGENIC
Chr7(GRCh37):g.35242137G>A	DDD	BENIGN	0.19	0.838	0.542	0.835	PATHOGENIC
Chr7(GRCh37):g.35289575G>A	DDD	BENIGN	0	0.953	0.844	1	PATHOGENIC
Chr7(GRCh37):g.40039066G>A	DDD	PATHOGENIC	0	1	0.793	1	Pathogenic
Chr7(GRCh37):g.40039073T>G	DDD	PATHOGENIC	0	1	0.867	0.999	PATHOGENIC
Chr7(GRCh37):g.42005526A>G	DDD	BENIGN	0.26	0.702	0.15	0.754	PATHOGENIC
Chr7(GRCh37):g.44184766G>A	ACMG	PATHOGENIC	0.03	0.386	0.883	0.994	Pathogenic
Chr7(GRCh37):g.44184770C>T	ACMG	PATHOGENIC	0.01	0.172	0.853	0.991	Pathogenic
Chr7(GRCh37):g.44184779C>G	ACMG	PATHOGENIC	0.07	0.014	0.601	0.577	PATHOGENIC
Chr7(GRCh37):g.44184833A>C	ACMG	PATHOGENIC	0	0.506	0.894	0.999	PATHOGENIC
Chr7(GRCh37):g.44185127C>T	ACMG	PATHOGENIC	0.03	0.849	0.812	0.957	PATHOGENIC
Chr7(GRCh37):g.44185159C>A	ACMG	PATHOGENIC	0	0.98	0.925	0.999	Pathogenic
Chr7(GRCh37):g.44185171A>G	ACMG	PATHOGENIC	0	0.521	0.856	0.986	PATHOGENIC
Chr7(GRCh37):g.44185175G>A	ACMG	PATHOGENIC	0	0.944	0.911	0.993	PATHOGENIC
Chr7(GRCh37):g.44185175G>C	ACMG	PATHOGENIC	0	0.511	0.93	0.992	PATHOGENIC
Chr7(GRCh37):g.44185202A>G	ACMG	PATHOGENIC	0.07	0.575	0.804	0.917	PATHOGENIC
Chr7(GRCh37):g.44185207A>G	ACMG	PATHOGENIC	0	0.897	0.93	0.992	PATHOGENIC
Chr7(GRCh37):g.44185207A>T	ACMG	PATHOGENIC	0	0.856	0.946	0.994	PATHOGENIC
Chr7(GRCh37):g.44185225G>A	ACMG	PATHOGENIC	0.02	0.999	0.969	0.999	Pathogenic
Chr7(GRCh37):g.44185231C>G	ACMG	PATHOGENIC	0.8	0.133	0.504	0.631	Pathogenic
Chr7(GRCh37):g.44185244G>C	ACMG	PATHOGENIC	0.08	0.111	0.679	0.662	Pathogenic
Chr7(GRCh37):g.44186062C>A	ACMG	PATHOGENIC	0.05	0.364	0.792	0.978	PATHOGENIC
Chr7(GRCh37):g.44186077A>T	ACMG	PATHOGENIC	0	0.533	0.967	0.998	PATHOGENIC
Chr7(GRCh37):g.44186138G>A	ACMG	PATHOGENIC	0	0.594	0.874	0.987	PATHOGENIC
Chr7(GRCh37):g.44186140A>C	ACMG	PATHOGENIC	0	0.741	0.945	0.993	PATHOGENIC
Chr7(GRCh37):g.44186179A>G	ACMG	PATHOGENIC	0	0.981	0.946	0.996	PATHOGENIC
Chr7(GRCh37):g.44186204T>G	ACMG	PATHOGENIC	0.03	0.185	0.744	0.975	PATHOGENIC
Chr7(GRCh37):g.44187258C>T	ACMG	PATHOGENIC	0	0.9	0.941	0.999	PATHOGENIC
Chr7(GRCh37):g.44187278G>C	ACMG	PATHOGENIC	0	0.76	0.896	0.997	PATHOGENIC
Chr7(GRCh37):g.44187278G>T	ACMG	PATHOGENIC	0	0.76	0.896	0.997	PATHOGENIC
Chr7(GRCh37):g.44187292C>T	ACMG	PATHOGENIC	0	0.691	0.935	0.999	PATHOGENIC
Chr7(GRCh37):g.44187300A>G	ACMG	PATHOGENIC	0	0.986	0.748	0.945	Pathogenic
Chr7(GRCh37):g.44187319C>T	ACMG	PATHOGENIC	0.65	0.877	0.728	0.968	PATHOGENIC
Chr7(GRCh37):g.44187331C>T	ACMG	PATHOGENIC	0	0.999	0.914	0.999	Pathogenic
Chr7(GRCh37):g.44187412A>G	ACMG	BENIGN	0	0.932	0.981	0.999	PATHOGENIC
Chr7(GRCh37):g.44189371C>T	ACMG	PATHOGENIC	0	1	0.943	1	PATHOGENIC
Chr7(GRCh37):g.44189397T>C	ACMG	PATHOGENIC	0.04	0.999	0.706	0.89	Pathogenic
Chr7(GRCh37):g.44189407T>G	ACMG	PATHOGENIC	0.02	0.986	0.658	0.899	PATHOGENIC
Chr7(GRCh37):g.44189423G>C	ACMG	PATHOGENIC	0	0.993	0.941	0.998	Pathogenic
Chr7(GRCh37):g.44189430A>G	ACMG	PATHOGENIC	0.01	0.575	0.946	0.988	PATHOGENIC
Chr7(GRCh37):g.44189437C>A	ACMG	PATHOGENIC	0	0.999	0.929	0.994	Pathogenic
Chr7(GRCh37):g.44189442A>G	ACMG	PATHOGENIC	0.02	0.998	0.962	0.997	PATHOGENIC
Chr7(GRCh37):g.44189448A>G	ACMG	PATHOGENIC	0.05	0.996	0.925	0.928	PATHOGENIC
Chr7(GRCh37):g.44189576G>A	ACMG	PATHOGENIC	0	0.995	0.936	0.994	PATHOGENIC
Chr7(GRCh37):g.44189582T>C	ACMG	PATHOGENIC	0.09	0.958	0.65	0.547	Pathogenic
Chr7(GRCh37):g.44189585C>T	ACMG	PATHOGENIC	0.01	0.999	0.933	0.995	Pathogenic
Chr7(GRCh37):g.44189590C>G	ACMG	PATHOGENIC	0	0.999	0.941	0.996	PATHOGENIC
Chr7(GRCh37):g.44189603C>T	ACMG	PATHOGENIC	0	0.999	0.937	0.999	Pathogenic
Chr7(GRCh37):g.44189607A>C	ACMG	PATHOGENIC	0	0.998	0.751	0.953	PATHOGENIC
Chr7(GRCh37):g.44189610G>T	ACMG	PATHOGENIC	0.91	0.998	0.58	0.936	PATHOGENIC
Chr7(GRCh37):g.44190560C>T	ACMG	PATHOGENIC	0.05	0.998	0.712	0.995	PATHOGENIC
Chr7(GRCh37):g.44190589A>G	ACMG	PATHOGENIC	0	1	0.983	1	Pathogenic
Chr7(GRCh37):g.44190642G>T	ACMG	PATHOGENIC	0.03	0.055	0.459	0.385	BENIGN
Chr7(GRCh37):g.44190652C>T	ACMG	PATHOGENIC	0.01	1	0.97	1	PATHOGENIC
Chr7(GRCh37):g.44190674G>T	ACMG	PATHOGENIC	0	0.999	0.91	0.993	PATHOGENIC
Chr7(GRCh37):g.44191883C>A	ACMG	PATHOGENIC	0	1	0.953	0.999	PATHOGENIC
Chr7(GRCh37):g.44191908A>G	ACMG	PATHOGENIC	0.26	0.655	0.774	0.955	PATHOGENIC
Chr7(GRCh37):g.44191911A>G	ACMG	PATHOGENIC	0	1	0.949	0.998	PATHOGENIC
Chr7(GRCh37):g.44191938A>G	ACMG	PATHOGENIC	0.72	0.916	0.753	0.976	PATHOGENIC
Chr7(GRCh37):g.44191972C>A	ACMG	PATHOGENIC	0.01	0.972	0.725	0.939	PATHOGENIC
Chr7(GRCh37):g.44191995C>G	ACMG	PATHOGENIC	0	1	0.984	1	PATHOGENIC
Chr7(GRCh37):g.44191997A>G	ACMG	PATHOGENIC	0	1	0.989	1	PATHOGENIC
Chr7(GRCh37):g.44192001C>T	ACMG	PATHOGENIC	0.01	0.999	0.947	1	PATHOGENIC
Chr7(GRCh37):g.44192905C>A	ACMG	PATHOGENIC	0	1	0.993	0.999	PATHOGENIC
Chr7(GRCh37):g.44192914G>A	ACMG	PATHOGENIC	0.19	0.998	0.82	0.99	PATHOGENIC
Chr7(GRCh37):g.44192917G>T	ACMG	PATHOGENIC	0	0.999	0.984	0.995	PATHOGENIC
Chr7(GRCh37):g.44192946A>C	ACMG	PATHOGENIC	0.02	0.801	0.713	0.8	Pathogenic
Chr7(GRCh37):g.44192971C>A	ACMG	PATHOGENIC	0.08	0.502	0.737	0.876	PATHOGENIC
Chr7(GRCh37):g.44192977C>T	ACMG	PATHOGENIC	0	1	0.995	0.998	Pathogenic
Chr7(GRCh37):g.44192978C>T	ACMG	PATHOGENIC	0	1	0.962	0.998	PATHOGENIC
Chr7(GRCh37):g.44193006C>A	ACMG	PATHOGENIC	0.05	0.985	0.806	0.97	PATHOGENIC
Chr7(GRCh37):g.66098307A>G	DDD	PATHOGENIC	0	0.986	0.766	0.827	Pathogenic
Chr7(GRCh37):g.70255639G>A	DDD	BENIGN	0.68	0.918	0.088	0.13	Benign
Chr7(GRCh37):g.73456998T>G	DDD	BENIGN	0	0	0.238	0.108	BENIGN
Chr7(GRCh37):g.73466280G>A	DDD	BENIGN	0.04	0.993	0.204	0.856	PATHOGENIC
Chr7(GRCh37):g.79818303A>C	DDD	PATHOGENIC	0	0.995	0.938	0.999	PATHOGENIC
Chr7(GRCh37):g.99703084A>C	DDD	PATHOGENIC	0	1	0.821	0.998	PATHOGENIC
Chr7(GRCh37):g.103162509C>T	DDD	PATHOGENIC	0	0.997	0.738	0.998	PATHOGENIC
Chr7(GRCh37):g.114298134C>T	DDD	BENIGN	0	0.989	0.493	0.993	PATHOGENIC
Chr7(GRCh37):g.117171028C>T	ACMG	PATHOGENIC	0	1	0.823	0.675	Pathogenic
Chr7(GRCh37):g.117199648T>G	ACMG	BENIGN	0	1	0.865	0.083	Pathogenic
Chr7(GRCh37):g.140449182A>G	DDD	BENIGN	0	0.998	0.959	0.997	PATHOGENIC
Chr7(GRCh37):g.140453133T>A	DDD	PATHOGENIC	0	0.984	0.943	0.998	Pathogenic
Chr7(GRCh37):g.140453146G>C	DDD	PATHOGENIC	0	0.971	0.796	0.979	PATHOGENIC
Chr7(GRCh37):g.140453990T>C	DDD	PATHOGENIC	0	0.328	0.632	0.996	PATHOGENIC
Chr7(GRCh37):g.140476811C>T	DDD	PATHOGENIC	0	0.999	0.912	1	Pathogenic
Chr7(GRCh37):g.140476815A>T	DDD	PATHOGENIC	0	0.989	0.878	0.999	PATHOGENIC
Chr7(GRCh37):g.140477855A>T	DDD	PATHOGENIC	0	0.835	0.652	0.938	PATHOGENIC
Chr7(GRCh37):g.140481377A>T	DDD	BENIGN	0.02	0.116	0.649	0.991	PATHOGENIC
Chr7(GRCh37):g.140501302T>C	DDD	PATHOGENIC	0.03	0.626	0.838	0.947	PATHOGENIC
Chr7(GRCh37):g.140501336C>G	DDD	PATHOGENIC	0	0.943	0.928	0.991	PATHOGENIC
Chr7(GRCh37):g.142570162C>G	ACMG	PATHOGENIC	0	1	0.674	0.996	PATHOGENIC
Chr7(GRCh37):g.146997325G>A	Amish	BENIGN	0.554	0.009	0.27	0.429	BENIGN
Chr7(GRCh37):g.148506461C>T	DDD	PATHOGENIC	0.05	0.003	0.927	0.973	PATHOGENIC
Chr7(GRCh37):g.148523618G>A	DDD	PATHOGENIC	0	0.983	0.783	0.995	PATHOGENIC
Chr7(GRCh37):g.148525925G>C	DDD	BENIGN	0.02	0.995	0.554	0.972	PATHOGENIC
Chr7(GRCh37):g.148525943C>T	DDD	BENIGN	0.01	0.999	0.564	0.957	PATHOGENIC
Chr7(GRCh37):g.155595916A>T	ACMG	PATHOGENIC	0	0.9	0.926	0.997	PATHOGENIC
Chr7(GRCh37):g.155596234T>A	DDD	BENIGN	0.01	0.921	0.721	0.969	PATHOGENIC
Chr7(GRCh37):g.155604536G>A	DDD	BENIGN	0	0.998	0.942	0.997	PATHOGENIC
Chr7(GRCh37):g.156798395T>G	DDD	BENIGN	0.03	0.533	0.252	0.908	PATHOGENIC
Chr7(GRCh37):g.156799173C>G	ACMG	PATHOGENIC	0	1	0.922	0.994	PATHOGENIC
Chr7(GRCh37):g.156802881C>G	DDD	BENIGN	0.28	0.264	0.163	0.16	BENIGN
Chr8(GRCh37):g.11607675C>T	DDD	PATHOGENIC	0	0.999	0.974	0.999	PATHOGENIC
Chr8(GRCh37):g.38002765G>C	DDD	PATHOGENIC	0	0.998	0.666	0.982	PATHOGENIC
Chr8(GRCh37):g.38111143A>G	DDD	PATHOGENIC	0	0.895	0.391	0.973	Benign
Chr8(GRCh37):g.38111197A>G	DDD	PATHOGENIC	0	0.966	0.408	0.997	BENIGN
Chr8(GRCh37):g.41791093C>T	DDD	PATHOGENIC	0	0.999	0.412	0.974	PATHOGENIC
Chr8(GRCh37):g.41791914T>G	DDD	BENIGN	0.08	0.395	0.126	0.201	Benign
Chr8(GRCh37):g.61655609C>T	DDD	BENIGN	0.15	0.601	0.156	0.631	PATHOGENIC
Chr8(GRCh37):g.61732609G>A	DDD	PATHOGENIC	0	0.995	0.732	0.99	PATHOGENIC
Chr8(GRCh37):g.61735081G>A	DDD	PATHOGENIC	0	0.987	0.816	0.999	PATHOGENIC
Chr8(GRCh37):g.61748764C>T	ACMG	PATHOGENIC	0.01	0.621	0.436	0.981	PATHOGENIC
Chr8(GRCh37):g.61749450C>T	DDD	PATHOGENIC	0	0.884	0.593	0.999	PATHOGENIC
Chr8(GRCh37):g.61765478G>T	DDD	PATHOGENIC	0	0.988	0.834	0.986	PATHOGENIC
Chr8(GRCh37):g.61773617A>G	ACMG	PATHOGENIC	0.54	0.039	0.064	0.568	PATHOGENIC
Chr8(GRCh37):g.72127849C>A	DDD	PATHOGENIC	0	0.993	0.951	0.999	PATHOGENIC
Chr8(GRCh37):g.72234480G>A	DDD	BENIGN	0.12	0.999	0.272	0.963	PATHOGENIC
Chr8(GRCh37):g.94793945G>T	ACMG	PATHOGENIC	0	0.979	0.952	0.984	Pathogenic
Chr8(GRCh37):g.97156927T>C	DDD	BENIGN	0.01	0.96	0.664	0.992	PATHOGENIC
Chr8(GRCh37):g.100779102C>T	DDD	BENIGN	0	0.998	0.574	0.884	Pathogenic
Chr8(GRCh37):g.100874030G>A	DDD	BENIGN	0	0.996	0.502	0.038	Pathogenic
Chr8(GRCh37):g.116430562T>G	ACMG	PATHOGENIC	0	0.997	0.978	0.998998	Pathogenic
Chr8(GRCh37):g.116430646C>A	DDD	PATHOGENIC	0	0.997	0.992	0.999	PATHOGENIC
Chr8(GRCh37):g.116599230G>A	DDD	BENIGN	0.02	0.992	0.664	0.971	PATHOGENIC
Chr8(GRCh37):g.116631739C>T	DDD	BENIGN	0.07	0.766	0.453	0.747	PATHOGENIC
Chr8(GRCh37):g.117869005T>C	DDD	PATHOGENIC	0.56	0.971	0.285	0.771	BENIGN
Chr8(GRCh37):g.118849384C>T	ACMG	PATHOGENIC	0.16	0.67	0.836	0.933	Benign
Chr8(GRCh37):g.119122774A>G	DDD	BENIGN	0.08	0.992	0.833	0.986	BENIGN
Chr8(GRCh37):g.126059464C>T	ACMG	PATHOGENIC	0.1	0.979	0.797	0.577	Pathogenic
Chr8(GRCh37):g.133150175C>T	DDD	PATHOGENIC	0	1	0.888	0.999	PATHOGENIC
Chr8(GRCh37):g.133184919C>T	DDD	PATHOGENIC	0	0.996	0.934	0.993	PATHOGENIC
Chr8(GRCh37):g.133192493G>A	DDD	PATHOGENIC	0	0.999	0.96	1	PATHOGENIC
Chr8(GRCh37):g.133192501C>T	DDD	PATHOGENIC	0.01	0.904	0.912	0.999	PATHOGENIC
Chr8(GRCh37):g.144900664C>T	ACMG	PATHOGENIC	0	0.934	0.714	0.995	PATHOGENIC
Chr8(GRCh37):g.144990697T>A	DDD	PATHOGENIC	0.27	0.291	0.25	0.813	PATHOGENIC
Chr8(GRCh37):g.144996236C>G	DDD	PATHOGENIC	0.17	0	0.156	0.006	Benign
Chr9(GRCh37):g.304642A>G	DDD	BENIGN	0.06	0.643	0.193	0.821	PATHOGENIC
Chr9(GRCh37):g.2039644G>C	DDD	BENIGN	0.02	0.925	0.8	0.978	PATHOGENIC
Chr9(GRCh37):g.2047310C>T	DDD	BENIGN	0.04	0.981	0.393	0.99	PATHOGENIC
Chr9(GRCh37):g.2058457G>A	DDD	PATHOGENIC	0.01	0.992	0.362	0.987	PATHOGENIC
Chr9(GRCh37):g.2060867C>T	DDD	PATHOGENIC	0	0.99	0.792	0.998	PATHOGENIC
Chr9(GRCh37):g.2060868G>A	DDD	PATHOGENIC	0	0.987	0.752	0.998	PATHOGENIC
Chr9(GRCh37):g.2081995C>T	DDD	PATHOGENIC	0	0.968	0.979	0.999	PATHOGENIC
Chr9(GRCh37):g.2086862C>T	DDD	PATHOGENIC	0	0.988	0.973	0.999	PATHOGENIC
Chr9(GRCh37):g.2088540G>T	DDD	PATHOGENIC	0	0.995	0.955	0.997	PATHOGENIC
Chr9(GRCh37):g.2097415A>C	DDD	PATHOGENIC	0	0.997	0.863	0.989	PATHOGENIC
Chr9(GRCh37):g.2110254G>A	DDD	PATHOGENIC	0	1	0.938	0.998	PATHOGENIC
Chr9(GRCh37):g.2181575G>A	DDD	PATHOGENIC	0.01	1	0.824	0.996	Pathogenic
Chr9(GRCh37):g.3937065C>G	ACMG	PATHOGENIC	0	0.095	0.247	0.976	PATHOGENIC
Chr9(GRCh37):g.3937117T>G	ACMG	PATHOGENIC	0	0.996	0.284	0.981	PATHOGENIC
Chr9(GRCh37):g.4574011C>G	Amish	BENIGN	0.763	0	0.111	0.526	BENIGN
Chr9(GRCh37):g.27183589C>T	DDD	BENIGN	0.26	0.188	0.071	0.864	PATHOGENIC
Chr9(GRCh37):g.27212761C>T	DDD	PATHOGENIC	0	0.999	0.82	0.996	PATHOGENIC
Chr9(GRCh37):g.35685526G>A	DDD	PATHOGENIC	0.01	0.901	0.788	0.992	PATHOGENIC
Chr9(GRCh37):g.35685669C>T	DDD	PATHOGENIC	0	0.985	0.914	0.996	PATHOGENIC
Chr9(GRCh37):g.37783990T>G	DDD	PATHOGENIC	0	0.822	0.91	0.729	Pathogenic
Chr9(GRCh37):g.79981721C>T	Amish	BENIGN	0.006	0.488	0.195	0.871	BENIGN
Chr9(GRCh37):g.86587871A>G	ACMG	PATHOGENIC	0	0.734	0.731	0.996	PATHOGENIC
Chr9(GRCh37):g.95477684C>T	DDD	PATHOGENIC	0	0.994	0.638	0.997	PATHOGENIC
Chr9(GRCh37):g.95480119C>T	DDD	BENIGN	0	0.998	0.574	0.992	PATHOGENIC
Chr9(GRCh37):g.98212206G>C	DDD	BENIGN	0	0.991	0.677	0.91	PATHOGENIC
Chr9(GRCh37):g.98221905T>C	DDD	BENIGN	0.13	0.748	0.744	0.778	PATHOGENIC
Chr9(GRCh37):g.98241382A>C	DDD	PATHOGENIC	0	0.916	0.872	0.99	PATHOGENIC
Chr9(GRCh37):g.98268811C>A	DDD	PATHOGENIC	0	0.999	0.903	1	PATHOGENIC
Chr9(GRCh37):g.100190936G>C	Amish	BENIGN	0.1	0.026	0.045	0.026	Pathogenic
Chr9(GRCh37):g.101133817C>T	ACMG	PATHOGENIC	0	0.996	0.749	0.98	PATHOGENIC
Chr9(GRCh37):g.101904859C>G	DDD	PATHOGENIC	0	1	0.891	0.999	PATHOGENIC
Chr9(GRCh37):g.101907097G>C	DDD	PATHOGENIC	0	1	0.954	1	PATHOGENIC
Chr9(GRCh37):g.113449414A>C	ACMG	PATHOGENIC	0	0.996	0.65	0.988625	Pathogenic
Chr9(GRCh37):g.113550018G>T	ACMG	PATHOGENIC	0	0.961	0.838	0.995	PATHOGENIC
Chr9(GRCh37):g.129453123C>G	DDD	BENIGN	0.39	0.096	0.398	0.934	PATHOGENIC
Chr9(GRCh37):g.129458717A>T	DDD	BENIGN	0	0.999	0.734	0.994	PATHOGENIC
Chr9(GRCh37):g.130420678G>T	DDD	PATHOGENIC	0	0.971	0.899	0.997	PATHOGENIC
Chr9(GRCh37):g.130425587C>T	DDD	PATHOGENIC	0	0.991	0.905	0.993	PATHOGENIC
Chr9(GRCh37):g.130425594T>G	DDD	PATHOGENIC	0	1	0.7	0.998	PATHOGENIC
Chr9(GRCh37):g.130425622C>T	DDD	PATHOGENIC	0	1	0.904	0.998	PATHOGENIC
Chr9(GRCh37):g.130427573T>G	DDD	PATHOGENIC	0	0.999	0.941	0.999	PATHOGENIC
Chr9(GRCh37):g.130428485G>A	DDD	PATHOGENIC	0.01	1	0.962	1	Pathogenic
Chr9(GRCh37):g.130438189G>A	DDD	PATHOGENIC	0	0.998	0.938	0.999	PATHOGENIC
Chr9(GRCh37):g.130444768G>T	DDD	PATHOGENIC	0	1	0.966	0.999	PATHOGENIC
Chr9(GRCh37):g.130444788C>T	DDD	PATHOGENIC	0	0.999	0.966	1	PATHOGENIC
Chr9(GRCh37):g.130444834T>C	DDD	PATHOGENIC	0	0.905	0.907	0.995	PATHOGENIC
Chr9(GRCh37):g.130982480C>T	DDD	PATHOGENIC	0.01	0.998	0.928	0.997	Pathogenic
Chr9(GRCh37):g.130984491A>T	DDD	PATHOGENIC	0.01	0.996	0.934	0.995	PATHOGENIC
Chr9(GRCh37):g.130985129C>G	DDD	PATHOGENIC	0.03	0.76	0.574	0.986	PATHOGENIC
Chr9(GRCh37):g.131331087G>A	DDD	BENIGN	0.01	0.761	0.231	0.964	PATHOGENIC
Chr9(GRCh37):g.131331108A>G	DDD	BENIGN	0.01	0.049	0.158	0.875	PATHOGENIC
Chr9(GRCh37):g.131367701C>A	DDD	BENIGN	0	0.979	0.556	0.998	PATHOGENIC
Chr9(GRCh37):g.131370454C>T	DDD	PATHOGENIC	0	0.001	0.408	0.999	PATHOGENIC
Chr9(GRCh37):g.133747517A>G	DDD	BENIGN	0.01	0.994	0.796	0.994	PATHOGENIC
Chr9(GRCh37):g.133748348G>A	DDD	PATHOGENIC	0.02	0.988	0.6	0.98	PATHOGENIC
Chr9(GRCh37):g.133753828G>A	DDD	PATHOGENIC	0.01	0.971	0.69	0.98	PATHOGENIC
Chr9(GRCh37):g.133755898G>A	DDD	PATHOGENIC	0	0.603	0.456	0.929	PATHOGENIC
Chr9(GRCh37):g.133942360G>C	Amish	BENIGN	0.01	0.316	0.191	0.264	Pathogenic
Chr9(GRCh37):g.135781265G>A	Amish	BENIGN	0.32	0.009	0.238	0.032	Benign
Chr9(GRCh37):g.138650300T>C	DDD	PATHOGENIC	0	0.69	0.606	0.995	PATHOGENIC
Chr9(GRCh37):g.139395033C>T	DDD	BENIGN	0	0.976	0.489	0.973	PATHOGENIC
Chr9(GRCh37):g.139401189C>G	DDD	BENIGN	0.27	0.95	0.499	0.917	PATHOGENIC
Chr9(GRCh37):g.139409067G>T	DDD	BENIGN	0.47	0.943	0.517	0.463	BENIGN
Chr9(GRCh37):g.139412302C>T	DDD	PATHOGENIC	0.01	0.917	0.762	0.966	PATHOGENIC
Chr9(GRCh37):g.140034024T>C	DDD	BENIGN	0	0.018	0.23	0.967	PATHOGENIC
Chr9(GRCh37):g.140056678T>G	DDD	PATHOGENIC	0	0.993	0.829	0.986	PATHOGENIC
Chr9(GRCh37):g.140056938G>C	DDD	PATHOGENIC	0	0.998	0.696	0.999	PATHOGENIC
Chr9(GRCh37):g.140057150G>T	DDD	PATHOGENIC	0	0.99	0.469	0.999	PATHOGENIC
Chr9(GRCh37):g.140057361T>C	DDD	PATHOGENIC	0	0.959	0.439	0.993	PATHOGENIC
Chr9(GRCh37):g.140058097C>T	DDD	PATHOGENIC	0	0.954	0.377	0.997	PATHOGENIC
Chr9(GRCh37):g.140058118C>A	DDD	PATHOGENIC	0	0.93	0.531	0.998	PATHOGENIC
Chr9(GRCh37):g.140094509G>T	Amish	BENIGN	0.2	0.288	0.046	0.011	Benign
Chr9(GRCh37):g.140676817G>A	DDD	PATHOGENIC	0	1	0.864	0.997	PATHOGENIC
Chr9(GRCh37):g.140685343C>T	DDD	PATHOGENIC	0.01	1	0.765	0.998	PATHOGENIC
Chr9(GRCh37):g.140706030C>T	DDD	PATHOGENIC	0	0.98	0.782	0.991	PATHOGENIC
Chr9(GRCh37):g.140707876G>C	DDD	BENIGN	0	0.996	0.823	0.998	BENIGN
Chr9(GRCh37):g.140708905G>C	DDD	PATHOGENIC	0	1	0.873	1	PATHOGENIC
Chr9(GRCh37):g.140710450G>A	DDD	PATHOGENIC	0	1	0.937	1	PATHOGENIC
Chr10(GRCh37):g.27356158T>A	DDD	BENIGN	0.01	0.084	0.041	0.301	BENIGN
Chr10(GRCh37):g.28149640C>T	DDD	BENIGN	0	0.998	0.605	0.157	Benign
Chr10(GRCh37):g.43602011A>G	ACMG	PATHOGENIC	0.01	0.854	0.592	0.985	PATHOGENIC
Chr10(GRCh37):g.43607555G>A	ACMG	BENIGN	0.36	0.011	0.498	0.059	Pathogenic
Chr10(GRCh37):g.43612164G>A	ACMG	PATHOGENIC	0	1	0.796	0.996	PATHOGENIC
Chr10(GRCh37):g.43613908A>T	ACMG	BENIGN	0.08	0.58	0.716	0.063	Pathogenic
Chr10(GRCh37):g.43619157T>C	ACMG	PATHOGENIC	0	1	0.94	0.998	PATHOGENIC
Chr10(GRCh37):g.43622168A>G	ACMG	PATHOGENIC	0	0.935	0.912	0.989	Pathogenic
Chr10(GRCh37):g.50856653T>C	Amish	BENIGN	0.3	0.14	0.319	0.917	Pathogenic
Chr10(GRCh37):g.56138660C>T	Amish	BENIGN	0.205	0.103	0.156	0.764	BENIGN
Chr10(GRCh37):g.72195544T>C	DDD	BENIGN	0.01	0.679	0.171	0.405	PATHOGENIC
Chr10(GRCh37):g.72195689G>C	DDD	BENIGN	0.24	0.847	0.192	0.623	PATHOGENIC
Chr10(GRCh37):g.73111336G>A	ACMG	PATHOGENIC	0	0.994	0.79	0.99	Pathogenic
Chr10(GRCh37):g.73111542T>C	ACMG	PATHOGENIC	0	0.972	0.621	0.916	Pathogenic
Chr10(GRCh37):g.76729812G>A	DDD	BENIGN	0	1	0.809	0.997	PATHOGENIC
Chr10(GRCh37):g.76788342C>T	DDD	BENIGN	0	0.65	0.533	0.983	PATHOGENIC
Chr10(GRCh37):g.76789623G>A	DDD	BENIGN	0	0.977	0.471	0.983	PATHOGENIC
Chr10(GRCh37):g.88817449G>A	DDD	PATHOGENIC	0.06	0.02	0.751	0.971	PATHOGENIC
Chr10(GRCh37):g.88820686C>T	ACMG	PATHOGENIC	0.24	0.293	0.659	0.947	PATHOGENIC
Chr10(GRCh37):g.88820767G>C	ACMG	PATHOGENIC	0.02	0.823	0.812	0.978	PATHOGENIC
Chr10(GRCh37):g.88820777T>G	ACMG	PATHOGENIC	0.01	0.878	0.809	0.986	PATHOGENIC
Chr10(GRCh37):g.89473067G>C	DDD	PATHOGENIC	0.07	0.056	0.372	0.784	PATHOGENIC
Chr10(GRCh37):g.89685305T>C	DDD	PATHOGENIC	0	0.828	0.966	0.998	PATHOGENIC
Chr10(GRCh37):g.89692936A>C	DDD	PATHOGENIC	0	0.981	0.773	0.981	PATHOGENIC
Chr10(GRCh37):g.89720669T>C	DDD	PATHOGENIC	0	0.999	0.886	0.999	PATHOGENIC
Chr10(GRCh37):g.89720826A>T	DDD	PATHOGENIC	0	0.999	0.946	0.999	PATHOGENIC
Chr10(GRCh37):g.94368805C>A	ACMG	PATHOGENIC	0	0.996	0.451	0.908	PATHOGENIC
Chr10(GRCh37):g.94389961A>G	DDD	PATHOGENIC	0.23	0.007	0.088	0.508	BENIGN
Chr10(GRCh37):g.97402864T>C	DDD	BENIGN	0.1	0.115	0.491	0.723	PATHOGENIC
Chr10(GRCh37):g.102541114G>C	DDD	BENIGN	0.03	0.998	0.754	0.996	PATHOGENIC
Chr10(GRCh37):g.102749544C>T	ACMG	PATHOGENIC	0.01	0.873	0.744	0.974	Pathogenic
Chr10(GRCh37):g.103991807C>A	DDD	BENIGN	0.51	0.066	0.404	0.609	PATHOGENIC
Chr10(GRCh37):g.112343981A>G	DDD	PATHOGENIC	0	0.993	0.779	0.993	PATHOGENIC
Chr10(GRCh37):g.112349657T>G	DDD	PATHOGENIC	0.01	0.994	0.751	0.981	PATHOGENIC
Chr10(GRCh37):g.112350774G>A	DDD	PATHOGENIC	0	0.999	0.653	0.997	PATHOGENIC
Chr10(GRCh37):g.112352960A>G	DDD	PATHOGENIC	0.01	0.079	0.484	0.895	PATHOGENIC
Chr10(GRCh37):g.112360880G>C	DDD	PATHOGENIC	0.18	0.816	0.736	0.981	PATHOGENIC
Chr10(GRCh37):g.112362724C>G	DDD	PATHOGENIC	0.06	0.964	0.933	0.872	PATHOGENIC
Chr10(GRCh37):g.112724437A>C	DDD	BENIGN	0.13	1	0.303	0.972	PATHOGENIC
Chr10(GRCh37):g.122645437T>C	DDD	BENIGN	0.02	0	0.281	0.824	PATHOGENIC
Chr10(GRCh37):g.123260357G>A	DDD	PATHOGENIC	0	0.985	0.908	0.975	PATHOGENIC
Chr10(GRCh37):g.123274794T>C	DDD	PATHOGENIC	0	0.999	0.921	0.987	PATHOGENIC
Chr10(GRCh37):g.123279563C>G	DDD	PATHOGENIC	0	0.786	0.982	1	PATHOGENIC
Chr10(GRCh37):g.123310859C>A	DDD	BENIGN	0.03	0.854	0.457	0.973	PATHOGENIC
Chr10(GRCh37):g.126086603C>T	Amish	BENIGN	1	0	0.138	0.125	Pathogenic
Chr10(GRCh37):g.127460912A>G	DDD	PATHOGENIC	0	1	0.545	0.957	Pathogenic
Chr11(GRCh37):g.686871T>C	DDD	PATHOGENIC	0.14	0.939	0.325	0.95	PATHOGENIC
Chr11(GRCh37):g.686997C>T	ACMG	PATHOGENIC	0	1	0.757	0.995	PATHOGENIC
Chr11(GRCh37):g.687941C>T	ACMG	PATHOGENIC	0	0.995	0.815	0.996	PATHOGENIC
Chr11(GRCh37):g.2182138C>G	ACMG	PATHOGENIC	0.06	0.102	0.53	0.31	BENIGN
Chr11(GRCh37):g.2189135C>T	ACMG	PATHOGENIC	0	0.999	0.955	0.541	Pathogenic
Chr11(GRCh37):g.17408485G>C	ACMG	BENIGN	0.01	0.308	0.369	0.017	Pathogenic
Chr11(GRCh37):g.17408638C>T	ACMG	PATHOGENIC	0.33	1	0.787	0.973	Pathogenic
Chr11(GRCh37):g.17408650T>G	ACMG	PATHOGENIC	0	0.999	0.981	1	PATHOGENIC
Chr11(GRCh37):g.17408675C>T	ACMG	PATHOGENIC	0.06	0.997	0.911	0.975	Pathogenic
Chr11(GRCh37):g.17408737C>G	ACMG	PATHOGENIC	0	1	0.984	0.999	PATHOGENIC
Chr11(GRCh37):g.17408737C>T	ACMG	PATHOGENIC	0	0.999	0.972	0.999	Pathogenic
Chr11(GRCh37):g.17408738G>A	ACMG	PATHOGENIC	0	0.999	0.94	0.999	Pathogenic
Chr11(GRCh37):g.17408738G>C	ACMG	PATHOGENIC	0	0.999	0.946	0.999	PATHOGENIC
Chr11(GRCh37):g.17408753T>G	ACMG	PATHOGENIC	0.01	0.994	0.834	0.85	Pathogenic
Chr11(GRCh37):g.17408758G>A	ACMG	PATHOGENIC	0	0.999	0.958	0.99	Pathogenic
Chr11(GRCh37):g.17408761G>T	ACMG	PATHOGENIC	0	0.998	0.832	0.975	PATHOGENIC
Chr11(GRCh37):g.17408777C>T	ACMG	PATHOGENIC	0	0.999	0.939	0.999	PATHOGENIC
Chr11(GRCh37):g.17408795C>T	ACMG	PATHOGENIC	0	0.999	0.961	0.997	Pathogenic
Chr11(GRCh37):g.17408831G>C	ACMG	BENIGN	0.18	0.01	0.344	0.002	Benign
Chr11(GRCh37):g.17408831G>T	ACMG	PATHOGENIC	0.63	0.791	0.427	0.371	Benign
Chr11(GRCh37):g.17408840G>C	ACMG	BENIGN	0.01	0.998	0.908	0.997	PATHOGENIC
Chr11(GRCh37):g.17408842G>A	ACMG	PATHOGENIC	0	1	0.979	1	PATHOGENIC
Chr11(GRCh37):g.17408863T>C	ACMG	PATHOGENIC	0	1	0.993	0.978	Pathogenic
Chr11(GRCh37):g.17408878G>A	ACMG	PATHOGENIC	0	1	0.971	0.999	Pathogenic
Chr11(GRCh37):g.17408884A>C	ACMG	PATHOGENIC	0	0.962	0.97	0.998	PATHOGENIC
Chr11(GRCh37):g.17408885C>T	ACMG	PATHOGENIC	0	0.859	0.918	0.995	PATHOGENIC
Chr11(GRCh37):g.17408942G>A	ACMG	PATHOGENIC	0.16	0.747	0.752	0.95	PATHOGENIC
Chr11(GRCh37):g.17408954C>T	ACMG	PATHOGENIC	0	0.997	0.981	0.996	Pathogenic
Chr11(GRCh37):g.17408960C>T	ACMG	PATHOGENIC	0	0.997	0.972	0.998	Pathogenic
Chr11(GRCh37):g.17409002C>T	ACMG	PATHOGENIC	0	1	0.954	0.98	PATHOGENIC
Chr11(GRCh37):g.17409027G>T	ACMG	PATHOGENIC	0	0.998	0.948	0.996	PATHOGENIC
Chr11(GRCh37):g.17409037C>A	ACMG	PATHOGENIC	0	1	0.986	0.999	Pathogenic
Chr11(GRCh37):g.17409037C>T	ACMG	PATHOGENIC	0	1	0.982	1	Pathogenic
Chr11(GRCh37):g.17409038G>A	ACMG	PATHOGENIC	0	1	0.977	1	Pathogenic
Chr11(GRCh37):g.17409055C>T	ACMG	BENIGN	0.03	0.959	0.558	0.048	Pathogenic
Chr11(GRCh37):g.17409095T>C	ACMG	PATHOGENIC	0.57	0.994	0.786	0.967	Pathogenic
Chr11(GRCh37):g.17409103T>G	ACMG	PATHOGENIC	0.02	0.999	0.945	0.996	Pathogenic
Chr11(GRCh37):g.17409129C>A	ACMG	PATHOGENIC	0	1	0.886	0.999	PATHOGENIC
Chr11(GRCh37):g.17409130T>C	ACMG	PATHOGENIC	0	0.999	0.946	0.997	Pathogenic
Chr11(GRCh37):g.17409130T>G	ACMG	PATHOGENIC	0	1	0.99	0.999	PATHOGENIC
Chr11(GRCh37):g.17409140T>G	ACMG	PATHOGENIC	0.01	0.467	0.828	0.903	Pathogenic
Chr11(GRCh37):g.17409142C>A	ACMG	PATHOGENIC	0.01	1	0.944	0.999	Pathogenic
Chr11(GRCh37):g.17409142C>T	ACMG	PATHOGENIC	0	1	0.954	0.999	Pathogenic
Chr11(GRCh37):g.17409148A>G	ACMG	PATHOGENIC	0	1	0.973	0.999	PATHOGENIC
Chr11(GRCh37):g.17409158C>T	ACMG	PATHOGENIC	0	0.999	0.942	0.994	PATHOGENIC
Chr11(GRCh37):g.17409173C>T	ACMG	PATHOGENIC	0	0.998	0.99	1	PATHOGENIC
Chr11(GRCh37):g.17409232C>A	ACMG	PATHOGENIC	0	0.999	0.984	0.992	PATHOGENIC
Chr11(GRCh37):g.17409238C>G	ACMG	PATHOGENIC	0	0.922	0.976	0.999	PATHOGENIC
Chr11(GRCh37):g.17409293A>G	ACMG	PATHOGENIC	0.03	0.957	0.93	0.987	PATHOGENIC
Chr11(GRCh37):g.17409337G>T	ACMG	PATHOGENIC	0.78	0.001	0.467	0.025	Benign
Chr11(GRCh37):g.17409368A>G	ACMG	PATHOGENIC	0	0.992	0.953	1	PATHOGENIC
Chr11(GRCh37):g.17409438C>G	ACMG	PATHOGENIC	0.04	0.999	0.815	0.906	Pathogenic
Chr11(GRCh37):g.17409454G>A	ACMG	PATHOGENIC	0	1	0.952	1	PATHOGENIC
Chr11(GRCh37):g.17409463A>C	ACMG	PATHOGENIC	0	0.977	0.939	0.997	Pathogenic
Chr11(GRCh37):g.17409464C>T	ACMG	PATHOGENIC	0.07	0.957	0.766	0.915	Pathogenic
Chr11(GRCh37):g.17409474G>T	ACMG	PATHOGENIC	0	0.996	0.924	0.974	PATHOGENIC
Chr11(GRCh37):g.17409481C>T	ACMG	PATHOGENIC	0.16	1	0.841	0.981	Pathogenic
Chr11(GRCh37):g.17409482C>G	ACMG	PATHOGENIC	0.52	1	0.817	0.963	Pathogenic
Chr11(GRCh37):g.17409482C>T	ACMG	PATHOGENIC	0.57	1	0.794	0.951	Pathogenic
Chr11(GRCh37):g.17409484T>C	ACMG	PATHOGENIC	0.8	0.996	0.811	0.901	Benign
Chr11(GRCh37):g.17409487T>G	ACMG	PATHOGENIC	0	0.999	0.907	0.99	PATHOGENIC
Chr11(GRCh37):g.17409490C>G	ACMG	PATHOGENIC	0.02	0.992	0.887	0.979	Pathogenic
Chr11(GRCh37):g.17409490C>T	ACMG	PATHOGENIC	0.16	0.938	0.831	0.95	Pathogenic
Chr11(GRCh37):g.17409502T>C	ACMG	PATHOGENIC	0.05	0.997	0.927	0.989	PATHOGENIC
Chr11(GRCh37):g.17409503G>A	ACMG	PATHOGENIC	0.02	0.997	0.845	0.985	PATHOGENIC
Chr11(GRCh37):g.17409520C>T	ACMG	PATHOGENIC	0	1	0.988	0.999	PATHOGENIC
Chr11(GRCh37):g.17409538C>T	ACMG	PATHOGENIC	0	0.998	0.965	0.997	Pathogenic
Chr11(GRCh37):g.17409631G>C	ACMG	PATHOGENIC	0	0.784	0.658	0.951	Pathogenic
Chr11(GRCh37):g.17414570C>T	ACMG	BENIGN	0.57	0.001	0.172	0.001	Benign
Chr11(GRCh37):g.17414600G>T	ACMG	PATHOGENIC	0	0.95	0.963	0.995	Pathogenic
Chr11(GRCh37):g.17414656A>G	ACMG	PATHOGENIC	0.08	0.786	0.915	0.974	Pathogenic
Chr11(GRCh37):g.17414671C>T	ACMG	PATHOGENIC	0	1	0.877	0.999	PATHOGENIC
Chr11(GRCh37):g.17415287A>T	ACMG	PATHOGENIC	0.03	0.52	0.781	0.99	PATHOGENIC
Chr11(GRCh37):g.17415826A>G	ACMG	PATHOGENIC	0	0.517	0.927	0.995	PATHOGENIC
Chr11(GRCh37):g.17415842C>G	ACMG	PATHOGENIC	0	1	0.936	0.999	PATHOGENIC
Chr11(GRCh37):g.17415842C>T	ACMG	PATHOGENIC	0	1	0.963	1	Pathogenic
Chr11(GRCh37):g.17415845C>G	ACMG	PATHOGENIC	0	0.996	0.996	0.999	Pathogenic
Chr11(GRCh37):g.17415880C>T	ACMG	PATHOGENIC	0	0.997	0.979	1	Pathogenic
Chr11(GRCh37):g.17415881G>A	ACMG	PATHOGENIC	0.01	1	0.93	0.997	Pathogenic
Chr11(GRCh37):g.17415926C>T	ACMG	PATHOGENIC	0	0.686	0.939	0.996	PATHOGENIC
Chr11(GRCh37):g.17415928C>A	ACMG	PATHOGENIC	0	0.977	0.88	0.98	PATHOGENIC
Chr11(GRCh37):g.17416761C>T	ACMG	PATHOGENIC	0	0.986	0.952	0.998	PATHOGENIC
Chr11(GRCh37):g.17417194T>C	ACMG	PATHOGENIC	0	0.953	0.772	0.926	Pathogenic
Chr11(GRCh37):g.17417416A>T	ACMG	PATHOGENIC	0	0.978	0.965	0.996	PATHOGENIC
Chr11(GRCh37):g.17417444A>G	ACMG	PATHOGENIC	0	0.997	0.979	0.999	PATHOGENIC
Chr11(GRCh37):g.17417461C>A	ACMG	PATHOGENIC	0.01	1	0.959	0.998	Pathogenic
Chr11(GRCh37):g.17417461C>T	ACMG	PATHOGENIC	0	1	0.964	0.982	PATHOGENIC
Chr11(GRCh37):g.17417462G>A	ACMG	PATHOGENIC	0	1	0.953	0.999	Pathogenic
Chr11(GRCh37):g.17418464T>C	ACMG	PATHOGENIC	0.05	0.998	0.868	0.975	PATHOGENIC
Chr11(GRCh37):g.17418527C>T	ACMG	PATHOGENIC	0	0.995	0.934	0.979	Pathogenic
Chr11(GRCh37):g.17418790C>T	ACMG	PATHOGENIC	0	0.995	0.933	0.986	Pathogenic
Chr11(GRCh37):g.17419903A>G	ACMG	PATHOGENIC	0	1	0.97	1	PATHOGENIC
Chr11(GRCh37):g.17424217C>A	ACMG	PATHOGENIC	0	0.998	0.989	1	PATHOGENIC
Chr11(GRCh37):g.17424218G>A	ACMG	PATHOGENIC	0	1	0.964	0.996	Pathogenic
Chr11(GRCh37):g.17426071C>T	ACMG	PATHOGENIC	0.03	0.057	0.767	0.979	Pathogenic
Chr11(GRCh37):g.17426072G>A	ACMG	PATHOGENIC	0.01	0.629	0.885	0.999	Pathogenic
Chr11(GRCh37):g.17427076T>C	ACMG	PATHOGENIC	0	0.973	0.896	0.998	PATHOGENIC
Chr11(GRCh37):g.17428530G>A	ACMG	PATHOGENIC	0.02	0.355	0.687	0.98	PATHOGENIC
Chr11(GRCh37):g.17428623G>A	ACMG	PATHOGENIC	0	0.91	0.693	0.992	PATHOGENIC
Chr11(GRCh37):g.17432169A>G	ACMG	PATHOGENIC	0	0.92	0.846	0.996	PATHOGENIC
Chr11(GRCh37):g.17432172T>C	ACMG	PATHOGENIC	0	0.986	0.792	0.989	PATHOGENIC
Chr11(GRCh37):g.17434271T>G	ACMG	PATHOGENIC	0	0.973	0.966	0.999	PATHOGENIC
Chr11(GRCh37):g.17434943G>A	ACMG	PATHOGENIC	0	1	0.855	0.999	Pathogenic
Chr11(GRCh37):g.17435002C>T	ACMG	PATHOGENIC	0	0.999	0.943	1	PATHOGENIC
Chr11(GRCh37):g.17436059C>T	ACMG	PATHOGENIC	0	0.918	0.914	0.673	Pathogenic
Chr11(GRCh37):g.17448675C>T	ACMG	PATHOGENIC	0	0.997	0.871	0.979	PATHOGENIC
Chr11(GRCh37):g.17452418A>T	ACMG	PATHOGENIC	0	0.925	0.922	0.993	PATHOGENIC
Chr11(GRCh37):g.17452434G>C	ACMG	PATHOGENIC	0.06	0.98	0.839	0.942	Pathogenic
Chr11(GRCh37):g.17464320C>T	ACMG	PATHOGENIC	0.01	1	0.862	0.999	Pathogenic
Chr11(GRCh37):g.17464413C>T	ACMG	PATHOGENIC	0	0.998	0.872	0.999	PATHOGENIC
Chr11(GRCh37):g.17464769A>C	ACMG	PATHOGENIC	0	0.968	0.922	0.994	PATHOGENIC
Chr11(GRCh37):g.17464840A>G	ACMG	PATHOGENIC	0	0.997	0.936	0.999	PATHOGENIC
Chr11(GRCh37):g.17470175A>T	ACMG	PATHOGENIC	0	0.156	0.653	0.98	PATHOGENIC
Chr11(GRCh37):g.17474732C>G	ACMG	PATHOGENIC	0.34	0.089	0.559	0.732	PATHOGENIC
Chr11(GRCh37):g.17474733C>G	ACMG	PATHOGENIC	0.04	0.089	0.637	0.755	PATHOGENIC
Chr11(GRCh37):g.17474734T>C	ACMG	PATHOGENIC	0.03	0.055	0.644	0.98	PATHOGENIC
Chr11(GRCh37):g.17482076C>T	ACMG	PATHOGENIC	0	0.893	0.895	0.974	PATHOGENIC
Chr11(GRCh37):g.17482100C>T	ACMG	PATHOGENIC	0.03	0.262	0.865	0.982	PATHOGENIC
Chr11(GRCh37):g.17482118C>T	ACMG	PATHOGENIC	0.01	0.971	0.833	0.995	Pathogenic
Chr11(GRCh37):g.17482222C>T	ACMG	BENIGN	0.07	0	0.569	0.033	Pathogenic
Chr11(GRCh37):g.17483260C>A	ACMG	PATHOGENIC	0	0.991	0.943	0.996	PATHOGENIC
Chr11(GRCh37):g.17483266G>A	ACMG	PATHOGENIC	0.02	0.878	0.894	0.973	Pathogenic
Chr11(GRCh37):g.17483278A>G	ACMG	PATHOGENIC	0.21	0.285	0.769	0.93	Pathogenic
Chr11(GRCh37):g.17483314A>C	ACMG	PATHOGENIC	0.06	0.094	0.72	0.939	Pathogenic
Chr11(GRCh37):g.17483321G>T	ACMG	PATHOGENIC	0.48	0.235	0.617	0.621	Benign
Chr11(GRCh37):g.17483325G>T	ACMG	PATHOGENIC	0	0.99	0.739	0.948	Pathogenic
Chr11(GRCh37):g.17483330C>T	ACMG	PATHOGENIC	0.01	0.561	0.669	0.956	PATHOGENIC
Chr11(GRCh37):g.17485004A>T	ACMG	PATHOGENIC	0	0.03	0.815	0.246	Pathogenic
Chr11(GRCh37):g.17491664G>T	ACMG	PATHOGENIC	0.22	0.616	0.82	0.945	PATHOGENIC
Chr11(GRCh37):g.17491666A>C	ACMG	PATHOGENIC	0.12	0.253	0.808	0.955	Pathogenic
Chr11(GRCh37):g.17491685G>C	ACMG	PATHOGENIC	0	0.997	0.888	0.69	Pathogenic
Chr11(GRCh37):g.17491729C>T	ACMG	PATHOGENIC	0.13	0.65	0.636	0.89	Pathogenic
Chr11(GRCh37):g.17496466A>C	ACMG	PATHOGENIC	0	0.96	0.97	0.997	Pathogenic
Chr11(GRCh37):g.17496466A>G	ACMG	PATHOGENIC	0	0.772	0.794	0.986	Pathogenic
Chr11(GRCh37):g.17496503G>A	ACMG	PATHOGENIC	0	0.999	0.976	0.998	Pathogenic
Chr11(GRCh37):g.17498252G>T	ACMG	PATHOGENIC	0	0.988	0.858	0.909	Pathogenic
Chr11(GRCh37):g.17498262A>T	ACMG	PATHOGENIC	0	0.946	0.863	0.746	Pathogenic
Chr11(GRCh37):g.17498305C>G	ACMG	PATHOGENIC	0	0.998	0.954	0.997	Pathogenic
Chr11(GRCh37):g.31823116A>G	DDD	BENIGN	0	0.999	0.928	0.997	PATHOGENIC
Chr11(GRCh37):g.31824316C>T	DDD	PATHOGENIC	0	0.988	0.932	0.996	PATHOGENIC
Chr11(GRCh37):g.32456316C>A	DDD	BENIGN	0.02	0.969	0.672	0.982	PATHOGENIC
Chr11(GRCh37):g.44219458C>A	DDD	BENIGN	0	0.972	0.721	0.991	PATHOGENIC
Chr11(GRCh37):g.44253937A>C	DDD	BENIGN	0	0.974	0.919	0.997	PATHOGENIC
Chr11(GRCh37):g.44254000C>T	Amish	BENIGN	0.07	0.998	0.841	0.162	Benign
Chr11(GRCh37):g.44257864A>G	DDD	BENIGN	0	0.994	0.762	0.978	PATHOGENIC
Chr11(GRCh37):g.45935882G>A	ACMG	PATHOGENIC	0	0.999	0.656	0.995	PATHOGENIC
Chr11(GRCh37):g.58920847G>A	DDD	PATHOGENIC	0.55	0.143	0.031	0.11	BENIGN
Chr11(GRCh37):g.64418832G>C	DDD	BENIGN	0.03	0.79	0.561	0.924	PATHOGENIC
Chr11(GRCh37):g.64571903A>G	ACMG	PATHOGENIC	0	0.999	0.979	0.998	PATHOGENIC
Chr11(GRCh37):g.64572600C>T	ACMG	PATHOGENIC	0	1	0.912	0.993	PATHOGENIC
Chr11(GRCh37):g.64573190C>G	ACMG	PATHOGENIC	0	1	0.956	0.995	PATHOGENIC
Chr11(GRCh37):g.64573201A>G	ACMG	PATHOGENIC	0	0.962	0.945	0.997	PATHOGENIC
Chr11(GRCh37):g.64573214T>A	ACMG	PATHOGENIC	0	0.988	0.883	0.985	PATHOGENIC
Chr11(GRCh37):g.64575049G>A	ACMG	PATHOGENIC	0.02	0.999	0.913	0.972	Pathogenic
Chr11(GRCh37):g.64575365G>A	ACMG	PATHOGENIC	0	0	0.753	0.985	Pathogenic
Chr11(GRCh37):g.64575475T>C	ACMG	PATHOGENIC	0.01	0.348	0.93	0.999	PATHOGENIC
Chr11(GRCh37):g.64575493A>G	ACMG	PATHOGENIC	0	1	0.965	0.999	PATHOGENIC
Chr11(GRCh37):g.64575527C>G	ACMG	PATHOGENIC	0.01	0.813	0.925	0.992	PATHOGENIC
Chr11(GRCh37):g.64575544G>T	ACMG	PATHOGENIC	0	0.475	0.972	0.999	Pathogenic
Chr11(GRCh37):g.64577445T>G	ACMG	PATHOGENIC	0.01	0.999	0.894	0.991	PATHOGENIC
Chr11(GRCh37):g.64577447C>G	ACMG	PATHOGENIC	0	0.997	0.902	0.983	PATHOGENIC
Chr11(GRCh37):g.64577448T>G	ACMG	PATHOGENIC	0	0.998	0.94	0.997	PATHOGENIC
Chr11(GRCh37):g.65978677C>T	DDD	PATHOGENIC	0	0.948	0.443	0.997	Pathogenic
Chr11(GRCh37):g.67257645A>G	ACMG	PATHOGENIC	0	0.996	0.872	0.998	PATHOGENIC
Chr11(GRCh37):g.67258282C>T	ACMG	PATHOGENIC	0	0.709	0.785	0.997	Pathogenic
Chr11(GRCh37):g.67258382G>A	ACMG	BENIGN	0.02	0.101	0.31	0.028	Benign
Chr11(GRCh37):g.67376129C>G	ACMG	PATHOGENIC	0	1	0.816	0.999	PATHOGENIC
Chr11(GRCh37):g.68115342G>A	DDD	BENIGN	0.1	1	0.884	0.829	PATHOGENIC
Chr11(GRCh37):g.68177518A>C	DDD	BENIGN	0	0.989	0.928	0.989	PATHOGENIC
Chr11(GRCh37):g.68703714G>T	ACMG	PATHOGENIC	0	0.998	0.959	0.998	Pathogenic
Chr11(GRCh37):g.71148919T>C	DDD	PATHOGENIC	0	0.997	0.886	0.998	PATHOGENIC
Chr11(GRCh37):g.71942151A>T	DDD	PATHOGENIC	0	1	0.927	0.999	PATHOGENIC
Chr11(GRCh37):g.72019642C>T	ACMG	PATHOGENIC	0.01	0.964	0.389	0.99	Pathogenic
Chr11(GRCh37):g.76867064C>G	DDD	PATHOGENIC	0	0.99	0.987	1	PATHOGENIC
Chr11(GRCh37):g.76919841A>G	DDD	PATHOGENIC	0	0.789	0.912	0.999	PATHOGENIC
Chr11(GRCh37):g.88911734C>A	DDD	PATHOGENIC	0	0.911	0.918	0.977	Pathogenic
Chr11(GRCh37):g.88961072C>A	DDD	PATHOGENIC	0.01	0.003	0.708	0.272	Pathogenic
Chr11(GRCh37):g.102815039G>T	DDD	BENIGN	0.02	0.786	0.217	0.976	PATHOGENIC
Chr11(GRCh37):g.102824993G>C	DDD	BENIGN	0.01	0.944	0.497	0.991	PATHOGENIC
Chr11(GRCh37):g.102825279T>A	DDD	BENIGN	0	0.752	0.237	0.992	PATHOGENIC
Chr11(GRCh37):g.103039637C>A	Amish	BENIGN	1	0	0.022	0.036	Benign
Chr11(GRCh37):g.108098599T>G	DDD	PATHOGENIC	0	0.991	0.703	1	PATHOGENIC
Chr11(GRCh37):g.108214039G>A	ACMG	PATHOGENIC	0	0.94	0.689	0.982	PATHOGENIC
Chr11(GRCh37):g.111958677A>G	ACMG	BENIGN	0.11	0.804	0.681	0.039	Pathogenic
Chr11(GRCh37):g.118307357C>A	DDD	BENIGN	0	0.007	0.078	0.297	PATHOGENIC
Chr11(GRCh37):g.118343034T>C	DDD	BENIGN	0	0.051	0.238	0.902	PATHOGENIC
Chr11(GRCh37):g.118343580C>T	DDD	BENIGN	0.04	0.859	0.4	0.987	PATHOGENIC
Chr11(GRCh37):g.118344084A>G	DDD	BENIGN	0.25	0.76	0.216	0.878	PATHOGENIC
Chr11(GRCh37):g.118344377C>G	DDD	BENIGN	0	0.991	0.397	0.776	PATHOGENIC
Chr11(GRCh37):g.118344600G>A	Amish	BENIGN	0.16	0.231	0.254	0.025	Benign
Chr11(GRCh37):g.118347562C>T	DDD	BENIGN	0	0.988	0.684	0.995	PATHOGENIC
Chr11(GRCh37):g.118348811G>A	DDD	PATHOGENIC	0	0.999	0.908	0.999	PATHOGENIC
Chr11(GRCh37):g.118348821T>G	DDD	PATHOGENIC	0	0.999	0.898	0.996	PATHOGENIC
Chr11(GRCh37):g.118348903A>G	DDD	PATHOGENIC	0.01	0.996	0.841	0.973	PATHOGENIC
Chr11(GRCh37):g.118355659G>C	DDD	PATHOGENIC	0	0.957	0.699	1	PATHOGENIC
Chr11(GRCh37):g.118368658G>T	DDD	PATHOGENIC	0	0.957	0.853	0.994	PATHOGENIC
Chr11(GRCh37):g.118368693C>T	DDD	PATHOGENIC	0	0.955	0.953	0.997	PATHOGENIC
Chr11(GRCh37):g.118371847C>T	DDD	BENIGN	0	0.953	0.45	0.988	PATHOGENIC
Chr11(GRCh37):g.118375184T>A	DDD	PATHOGENIC	0	0.994	0.452	0.912	PATHOGENIC
Chr11(GRCh37):g.119148880A>C	DDD	PATHOGENIC	0	0.998	0.904	0.99	PATHOGENIC
Chr11(GRCh37):g.119148880A>G	DDD	PATHOGENIC	0.01	0.996	0.895	0.987	PATHOGENIC
Chr11(GRCh37):g.119156070C>T	DDD	BENIGN	0.01	0.212	0.31	0.851	PATHOGENIC
Chr11(GRCh37):g.120989333G>A	DDD	BENIGN	0	0.999	0.565	0.993	Pathogenic
Chr11(GRCh37):g.121008311G>C	DDD	PATHOGENIC	0.18	0.169	0.059	0.355	Benign
Chr11(GRCh37):g.121016459A>C	DDD	BENIGN	0.02	0.606	0.216	0.887	Pathogenic
Chr11(GRCh37):g.121031010G>A	DDD	PATHOGENIC	0.07	0.999	0.731	1	PATHOGENIC
Chr11(GRCh37):g.124739448C>G	ACMG	PATHOGENIC	0	0.796	0.37	0.721	PATHOGENIC
Chr11(GRCh37):g.124740144G>A	DDD	BENIGN	0	0.999	0.441	0.02	Benign
Chr11(GRCh37):g.124744034G>T	Amish	BENIGN	0.01	0.993	0.811	0.966	Pathogenic
Chr11(GRCh37):g.125864792C>T	DDD	BENIGN	0	0.989	0.258	0.825	Pathogenic
Chr11(GRCh37):g.125873860T>A	DDD	BENIGN	0.01	0.996	0.282	0.948	PATHOGENIC
Chr12(GRCh37):g.2595282T>C	DDD	BENIGN	0	0.994	0.948	0.996	PATHOGENIC
Chr12(GRCh37):g.2716255G>C	DDD	BENIGN	0.01	0.98	0.936	0.994	PATHOGENIC
Chr12(GRCh37):g.4479739G>C	ACMG	PATHOGENIC	0	0.998	0.515	0.943	PATHOGENIC
Chr12(GRCh37):g.6697549C>T	DDD	PATHOGENIC	0	0.71	0.925	0.977	Pathogenic
Chr12(GRCh37):g.6701647T>C	ACMG	PATHOGENIC	0.01	0.992	0.938	0.926	PATHOGENIC
Chr12(GRCh37):g.6709021C>T	DDD	PATHOGENIC	0	1	0.968	1	PATHOGENIC
Chr12(GRCh37):g.13720081C>A	ACMG	PATHOGENIC	0.01	0.971	0.283	0.981	PATHOGENIC
Chr12(GRCh37):g.13720096C>A	DDD	PATHOGENIC	0	1	0.783	0.998	PATHOGENIC
Chr12(GRCh37):g.13720098C>G	DDD	PATHOGENIC	0	1	0.842	0.998	Pathogenic
Chr12(GRCh37):g.13720104A>G	DDD	PATHOGENIC	0	0.999	0.781	0.991	PATHOGENIC
Chr12(GRCh37):g.13722886C>A	DDD	PATHOGENIC	0	0.963	0.723	0.993	PATHOGENIC
Chr12(GRCh37):g.13724742T>G	DDD	PATHOGENIC	0.01	0.882	0.276	0.949	PATHOGENIC
Chr12(GRCh37):g.13724844C>T	DDD	PATHOGENIC	0.01	1	0.46	0.995	PATHOGENIC
Chr12(GRCh37):g.13724849G>C	ACMG	PATHOGENIC	0	1	0.546	0.984	PATHOGENIC
Chr12(GRCh37):g.13761623A>G	DDD	PATHOGENIC	0.01	0.999	0.673	0.985	PATHOGENIC
Chr12(GRCh37):g.13761664G>A	DDD	PATHOGENIC	0.01	1	0.546	0.991	PATHOGENIC
Chr12(GRCh37):g.13761702G>C	DDD	PATHOGENIC	0	0.999	0.523	0.992	PATHOGENIC
Chr12(GRCh37):g.13764764A>T	DDD	PATHOGENIC	0	0.983	0.893	0.988	PATHOGENIC
Chr12(GRCh37):g.13768108T>C	DDD	PATHOGENIC	0.01	0.818	0.559	0.97	PATHOGENIC
Chr12(GRCh37):g.13768155T>C	DDD	PATHOGENIC	0	0.325	0.338	0.955	PATHOGENIC
Chr12(GRCh37):g.13768200A>G	DDD	PATHOGENIC	0	1	0.697	0.988	PATHOGENIC
Chr12(GRCh37):g.14769647C>T	DDD	BENIGN	0.11	0.378	0.352	0.906	PATHOGENIC
Chr12(GRCh37):g.14840989C>T	DDD	BENIGN	0.05	0.844	0.413	0.944	PATHOGENIC
Chr12(GRCh37):g.14849268C>A	DDD	BENIGN	0	0.913	0.634	0.978	PATHOGENIC
Chr12(GRCh37):g.21981943G>T	DDD	PATHOGENIC	0	0.992	0.803	0.997	PATHOGENIC
Chr12(GRCh37):g.21995260C>T	DDD	PATHOGENIC	0.03	0.802	0.82	0.988	PATHOGENIC
Chr12(GRCh37):g.21997785G>T	DDD	PATHOGENIC	0	0.896	0.863	0.988	PATHOGENIC
Chr12(GRCh37):g.22013966C>A	DDD	BENIGN	0	1	0.941	1	PATHOGENIC
Chr12(GRCh37):g.22061091C>T	DDD	PATHOGENIC	0.05	0.942	0.855	0.997	PATHOGENIC
Chr12(GRCh37):g.23689589C>G	DDD	PATHOGENIC	0.02	0.756	0.755	0.987	PATHOGENIC
Chr12(GRCh37):g.23696234T>G	ACMG	PATHOGENIC	0	1	0.815	0.998	PATHOGENIC
Chr12(GRCh37):g.25398254T>C	ACMG	PATHOGENIC	0.05	0.968	0.749	0.982	Pathogenic
Chr12(GRCh37):g.25398279C>T	DDD	PATHOGENIC	0	0.959	0.803	0.981	PATHOGENIC
Chr12(GRCh37):g.28116671T>A	DDD	BENIGN	0	0.998	0.916	0.999	PATHOGENIC
Chr12(GRCh37):g.32884290G>A	ACMG	PATHOGENIC	0	0.994	0.937	0.998	PATHOGENIC
Chr12(GRCh37):g.39726032T>G	ACMG	PATHOGENIC	0	0.649	0.89	0.987	PATHOGENIC
Chr12(GRCh37):g.39726045C>G	ACMG	PATHOGENIC	0.01	0.776	0.835	0.953	PATHOGENIC
Chr12(GRCh37):g.39726059A>C	ACMG	PATHOGENIC	0	0.277	0.911	0.993	PATHOGENIC
Chr12(GRCh37):g.39726206C>T	ACMG	PATHOGENIC	0	0.226	0.726	0.997	Pathogenic
Chr12(GRCh37):g.39730941T>C	Amish	BENIGN	0.02	0.987	0.092	0.753	Benign
Chr12(GRCh37):g.48368629G>T	DDD	PATHOGENIC	0	0.987	0.855	0.994	PATHOGENIC
Chr12(GRCh37):g.48369835C>G	ACMG	PATHOGENIC	0	1	0.993	1	PATHOGENIC
Chr12(GRCh37):g.48370620C>A	DDD	PATHOGENIC	0	0.998	0.98	1	PATHOGENIC
Chr12(GRCh37):g.48371886C>A	DDD	BENIGN	0.01	0.981	0.61	0.98	PATHOGENIC
Chr12(GRCh37):g.48373317G>A	DDD	PATHOGENIC	0.01	0.894	0.814	0.997	PATHOGENIC
Chr12(GRCh37):g.48379537C>T	DDD	PATHOGENIC	0	0.999	0.969	0.999	PATHOGENIC
Chr12(GRCh37):g.48380652C>T	DDD	PATHOGENIC	0	0.998	0.985	0.999	PATHOGENIC
Chr12(GRCh37):g.48383573C>T	DDD	BENIGN	0.06	0.959	0.571	0.939	Benign
Chr12(GRCh37):g.48388220G>A	Amish	BENIGN	0.68	0.003	0.339	0.039	Benign
Chr12(GRCh37):g.48389524T>C	DDD	BENIGN	0.25	0.003	0.265	0.255	BENIGN
Chr12(GRCh37):g.49420076G>A	DDD	PATHOGENIC	0	0.999	0.807	0.997	PATHOGENIC
Chr12(GRCh37):g.49420129G>C	DDD	PATHOGENIC	0	1	0.9	0.982	BENIGN
Chr12(GRCh37):g.49420202G>C	DDD	BENIGN	0	0.998	0.672	0.543	BENIGN
Chr12(GRCh37):g.49420213C>T	DDD	PATHOGENIC	0	0.116	0.694	0.964	PATHOGENIC
Chr12(GRCh37):g.49420493G>C	DDD	BENIGN	0	0.999	0.631	0.991	PATHOGENIC
Chr12(GRCh37):g.49420784G>A	DDD	BENIGN	0	0.998	0.579	0.947	PATHOGENIC
Chr12(GRCh37):g.49424487A>G	DDD	BENIGN	0	0.963	0.661	0.792	BENIGN
Chr12(GRCh37):g.49426082G>C	DDD	BENIGN	0.02	0.262	0.349	0.253	BENIGN
Chr12(GRCh37):g.49426313C>A	DDD	BENIGN	0.21	0.001	0.263	0.018	BENIGN
Chr12(GRCh37):g.49427743C>T	DDD	PATHOGENIC	0	0.994	0.303	0.978	PATHOGENIC
Chr12(GRCh37):g.49431084T>C	DDD	BENIGN	0.17	0.003	0.219	0.241	BENIGN
Chr12(GRCh37):g.49431241C>T	DDD	BENIGN	0.02	0.164	0.408	0.624	PATHOGENIC
Chr12(GRCh37):g.49431305T>A	DDD	BENIGN	0.08	0.948	0.323	0.219	BENIGN
Chr12(GRCh37):g.49431810C>G	DDD	BENIGN	0.02	0.511	0.381	0.542	PATHOGENIC
Chr12(GRCh37):g.49432089T>C	DDD	BENIGN	0.01	0.996	0.726	0.934	PATHOGENIC
Chr12(GRCh37):g.49432542T>A	DDD	BENIGN	0.09	0.446	0.34	0.625	PATHOGENIC
Chr12(GRCh37):g.49433526T>A	DDD	BENIGN	0	0.997	0.655	0.95	PATHOGENIC
Chr12(GRCh37):g.49434218C>G	DDD	BENIGN	0.09	0.13	0.302	0.321	BENIGN
Chr12(GRCh37):g.49438189G>C	DDD	PATHOGENIC	0	0.996	0.533	0.906	PATHOGENIC
Chr12(GRCh37):g.49440539C>G	DDD	PATHOGENIC	0	0.998	0.976	0.989	PATHOGENIC
Chr12(GRCh37):g.49443670C>G	DDD	BENIGN	0.11	0.001	0.289	0.437	BENIGN
Chr12(GRCh37):g.49444768G>C	DDD	BENIGN	0.07	0.264	0.247	0.159	BENIGN
Chr12(GRCh37):g.49445460G>A	DDD	BENIGN	0	0	0.233	0.176	BENIGN
Chr12(GRCh37):g.49445578G>A	DDD	BENIGN	0.01	0.001	0.224	0.108	Benign
Chr12(GRCh37):g.49445649G>C	DDD	BENIGN	0	0.533	0.348	0.262	BENIGN
Chr12(GRCh37):g.49445719G>C	DDD	BENIGN	0.05	0.458	0.374	0.282	BENIGN
Chr12(GRCh37):g.49445799G>A	DDD	BENIGN	0	0.124	0.396	0.41	Benign
Chr12(GRCh37):g.49579458T>G	DDD	PATHOGENIC	0.07	0.019	0.412	0.893	PATHOGENIC
Chr12(GRCh37):g.49579584G>C	DDD	PATHOGENIC	0	0.724	0.784	0.998	PATHOGENIC
Chr12(GRCh37):g.49579631G>A	DDD	PATHOGENIC	0	1	0.909	1	PATHOGENIC
Chr12(GRCh37):g.49579731T>C	DDD	PATHOGENIC	0.01	0.934	0.82	0.997	PATHOGENIC
Chr12(GRCh37):g.49580429C>T	DDD	PATHOGENIC	0.02	0.502	0.866	0.999	PATHOGENIC
Chr12(GRCh37):g.49580580C>T	DDD	PATHOGENIC	0.18	0.036	0.208	0.719	PATHOGENIC
Chr12(GRCh37):g.52082570A>G	DDD	PATHOGENIC	0.01	0.702	0.958	0.997	PATHOGENIC
Chr12(GRCh37):g.52093447T>C	DDD	PATHOGENIC	0	0.783	0.953	0.992	PATHOGENIC
Chr12(GRCh37):g.52096664T>C	DDD	PATHOGENIC	0	0.144	0.975	0.994	PATHOGENIC
Chr12(GRCh37):g.52099288G>A	DDD	PATHOGENIC	0	0.764	0.943	0.999	PATHOGENIC
Chr12(GRCh37):g.52099312G>A	DDD	PATHOGENIC	0.04	0.3	0.904	0.997	PATHOGENIC
Chr12(GRCh37):g.52115370A>G	DDD	BENIGN	1	0.001	0.32	0.177	BENIGN
Chr12(GRCh37):g.52162970G>A	DDD	BENIGN	0.14	0.574	0.611	0.895	PATHOGENIC
Chr12(GRCh37):g.52163721G>A	DDD	BENIGN	0.11	0.917	0.572	0.276	Pathogenic
Chr12(GRCh37):g.52168091G>A	DDD	BENIGN	0	1	0.958	0.999	PATHOGENIC
Chr12(GRCh37):g.52180326G>T	DDD	PATHOGENIC	0	0.994	0.79	0.997	PATHOGENIC
Chr12(GRCh37):g.52200143G>A	DDD	PATHOGENIC	0	0.999	0.966	1	PATHOGENIC
Chr12(GRCh37):g.52200192T>G	DDD	PATHOGENIC	0	0.996	0.988	0.998	PATHOGENIC
Chr12(GRCh37):g.52200900A>G	ACMG	PATHOGENIC	0	0.997	0.782	0.995	Pathogenic
Chr12(GRCh37):g.53702071A>G	Amish	BENIGN	0.02	0.19	0.338	0.12	Pathogenic
Chr12(GRCh37):g.56481850C>G	Amish	BENIGN	0	0.997	0.904	0.999	PATHOGENIC
Chr12(GRCh37):g.65113827G>A	DDD	BENIGN	0	0.84	0.287	0.987	Pathogenic
Chr12(GRCh37):g.88500452C>A	DDD	PATHOGENIC	0	0.771	0.15	0.971	PATHOGENIC
Chr12(GRCh37):g.102045044C>G	Amish	BENIGN	0.02	0.039	0.145	0.065	Benign
Chr12(GRCh37):g.108956433C>G	Amish	BENIGN	0.1	0.84	0.184	0.218	Benign
Chr12(GRCh37):g.112856920C>T	DDD	PATHOGENIC	0.03	0.068	0.213	0.885	PATHOGENIC
Chr12(GRCh37):g.112888166A>G	DDD	PATHOGENIC	0.02	0.856	0.92	0.997	PATHOGENIC
Chr12(GRCh37):g.112888168T>G	DDD	PATHOGENIC	0.01	0.435	0.9	0.997	Pathogenic
Chr12(GRCh37):g.112888199C>G	DDD	PATHOGENIC	0.01	0.345	0.924	0.986	PATHOGENIC
Chr12(GRCh37):g.112891083G>C	DDD	PATHOGENIC	0.01	0.935	0.769	0.945	PATHOGENIC
Chr12(GRCh37):g.112910835A>G	DDD	PATHOGENIC	0.02	0.049	0.525	0.934	PATHOGENIC
Chr12(GRCh37):g.112926852C>T	DDD	PATHOGENIC	0.1	0.159	0.675	0.973	PATHOGENIC
Chr12(GRCh37):g.112926887G>A	DDD	PATHOGENIC	0.03	0.999	0.992	0.999	PATHOGENIC
Chr12(GRCh37):g.112926909A>C	DDD	PATHOGENIC	0	0.999	0.977	1	PATHOGENIC
Chr12(GRCh37):g.112939976C>T	DDD	PATHOGENIC	0.15	0.124	0.195	0.964	PATHOGENIC
Chr12(GRCh37):g.114804159G>T	DDD	BENIGN	0	0.643	0.381	0.923	PATHOGENIC
Chr12(GRCh37):g.114823364T>A	DDD	BENIGN	0	0.998	0.577	0.997	PATHOGENIC
Chr12(GRCh37):g.115109963G>A	DDD	BENIGN	0	0.635	0.661	0.992	PATHOGENIC
Chr12(GRCh37):g.116401227G>A	DDD	PATHOGENIC	0	0.999	0.637	0.997	PATHOGENIC
Chr12(GRCh37):g.116401291T>C	DDD	BENIGN	0.01	0.021	0.18	0.463	PATHOGENIC
Chr12(GRCh37):g.116406896A>C	DDD	PATHOGENIC	0.35	0.815	0.398	0.92	PATHOGENIC
Chr12(GRCh37):g.116408461G>A	DDD	PATHOGENIC	0	0.998	0.791	0.991	PATHOGENIC
Chr12(GRCh37):g.116413012C>T	DDD	PATHOGENIC	0	1	0.883	1	PATHOGENIC
Chr12(GRCh37):g.116413403G>C	DDD	PATHOGENIC	0	0.045	0.721	0.99	PATHOGENIC
Chr12(GRCh37):g.116428852T>C	DDD	BENIGN	0.33	0.007	0.071	0.248	BENIGN
Chr12(GRCh37):g.116429242C>T	DDD	BENIGN	0.1	0.113	0.17	0.084	Benign
Chr12(GRCh37):g.116429281A>G	DDD	PATHOGENIC	0	0.994	0.934	0.998	PATHOGENIC
Chr12(GRCh37):g.116434360G>A	DDD	BENIGN	0	0.998	0.696	0.989	PATHOGENIC
Chr12(GRCh37):g.116435008G>A	DDD	PATHOGENIC	0	0.996	0.893	1	PATHOGENIC
Chr12(GRCh37):g.116443711T>C	DDD	BENIGN	0	0.994	0.692	0.984	PATHOGENIC
Chr12(GRCh37):g.116444173T>C	DDD	BENIGN	0.11	0.039	0.311	0.324	BENIGN
Chr12(GRCh37):g.116446681T>C	DDD	BENIGN	0.63	0	0.095	0.052	BENIGN
Chr12(GRCh37):g.116457104G>A	DDD	BENIGN	0.37	0.229	0.202	0.489	PATHOGENIC
Chr12(GRCh37):g.116549291C>G	DDD	PATHOGENIC	0.01	1	0.724	0.998	PATHOGENIC
Chr12(GRCh37):g.121416617C>G	ACMG	PATHOGENIC	0	0.997	0.814	0.799	PATHOGENIC
Chr12(GRCh37):g.121416627C>T	ACMG	PATHOGENIC	0	0.997	0.875	0.992	PATHOGENIC
Chr12(GRCh37):g.121416629G>A	ACMG	PATHOGENIC	0	1	0.956	0.997	Pathogenic
Chr12(GRCh37):g.121416656G>C	ACMG	PATHOGENIC	0	0.999	0.908	0.988	PATHOGENIC
Chr12(GRCh37):g.121416890C>G	ACMG	PATHOGENIC	0	0.738	0.821	0.941	PATHOGENIC
Chr12(GRCh37):g.121426670T>C	ACMG	PATHOGENIC	0.03	0.832	0.865	0.982	PATHOGENIC
Chr12(GRCh37):g.121426691A>G	ACMG	PATHOGENIC	0.01	0.907	0.752	0.881	PATHOGENIC
Chr12(GRCh37):g.121426746A>C	ACMG	PATHOGENIC	0	0.999	0.989	0.998	PATHOGENIC
Chr12(GRCh37):g.121431353T>C	ACMG	BENIGN	1	0	0.326	0.039	Benign
Chr12(GRCh37):g.121431387G>T	ACMG	PATHOGENIC	0.02	0.058	0.611	0.961	PATHOGENIC
Chr12(GRCh37):g.121431469A>C	ACMG	PATHOGENIC	0	0.882	0.882	0.995	PATHOGENIC
Chr12(GRCh37):g.121432062A>G	ACMG	PATHOGENIC	0.01	0.294	0.739	0.993	PATHOGENIC
Chr12(GRCh37):g.121434371C>G	ACMG	BENIGN	0	1	0.964	0.656	Pathogenic
Chr12(GRCh37):g.121437365C>T	ACMG	BENIGN	0.01	0.098	0.507	0.341	Pathogenic
Chr12(GRCh37):g.122285043C>A	DDD	BENIGN	0.01	0.999	0.699	0.997	PATHOGENIC
Chr12(GRCh37):g.122295280T>C	DDD	BENIGN	0	0.999	0.534	0.998	PATHOGENIC
Chr13(GRCh37):g.78474031A>C	DDD	BENIGN	0	0.996	0.964	1	PATHOGENIC
Chr13(GRCh37):g.100637347T>C	ACMG	PATHOGENIC	0	1	0.831	0.999	PATHOGENIC
Chr13(GRCh37):g.100637757G>T	DDD	BENIGN	0.22	0	0.093	0.038	BENIGN
Chr13(GRCh37):g.101742306C>T	DDD	PATHOGENIC	0	0.991	0.874	0.996	PATHOGENIC
Chr13(GRCh37):g.101742315G>T	DDD	BENIGN	0.01	0.951	0.798	0.076	Benign
Chr13(GRCh37):g.101756915G>A	DDD	PATHOGENIC	0	0.973	0.817	0.999	Benign
Chr13(GRCh37):g.101881803T>C	DDD	BENIGN	0.09	0.487	0.706	0.078	Benign
Chr13(GRCh37):g.110807675G>C	ACMG	PATHOGENIC	0	0.999	0.876	1	PATHOGENIC
Chr13(GRCh37):g.110822911C>T	ACMG	PATHOGENIC	0	0.999	0.969	0.998	PATHOGENIC
Chr13(GRCh37):g.110823029G>A	DDD	BENIGN	0.04	0.984	0.769	0.981	Pathogenic
Chr13(GRCh37):g.110825075C>T	DDD	PATHOGENIC	0	1	0.959	0.993	PATHOGENIC
Chr13(GRCh37):g.110830197C>T	DDD	PATHOGENIC	0	1	0.979	0.999	PATHOGENIC
Chr13(GRCh37):g.110830543C>T	ACMG	PATHOGENIC	0	0.999	0.962	1	Pathogenic
Chr13(GRCh37):g.110838818C>T	ACMG	PATHOGENIC	0	1	0.949	0.999	PATHOGENIC
Chr13(GRCh37):g.110862526C>G	DDD	BENIGN	0.01	0.905	0.386	0.67	PATHOGENIC
Chr13(GRCh37):g.111098183G>T	DDD	BENIGN	0.74	0.41	0.46	0.7	PATHOGENIC
Chr13(GRCh37):g.111111210G>A	DDD	PATHOGENIC	0	0.411	0.846	0.993	PATHOGENIC
Chr13(GRCh37):g.111117881G>A	DDD	PATHOGENIC	0	0.999	0.933	1	PATHOGENIC
Chr13(GRCh37):g.111137266C>A	DDD	BENIGN	0.38	0.978	0.297	0.907	PATHOGENIC
Chr13(GRCh37):g.111164386G>A	ACMG	BENIGN	0	1	0.903	0.139	Pathogenic
Chr14(GRCh37):g.21861339T>G	DDD	BENIGN	0.21	0.246	0.213	0.578	BENIGN
Chr14(GRCh37):g.21868613G>A	DDD	BENIGN	0	0.96	0.824	0.999	PATHOGENIC
Chr14(GRCh37):g.21871618T>G	DDD	PATHOGENIC	0.01	0.024	0.507	0.867	BENIGN
Chr14(GRCh37):g.23858207G>A	Amish	BENIGN	0	1	0.822	0.941	Pathogenic
Chr14(GRCh37):g.23862237C>A	DDD	BENIGN	0	0.998	0.611	0.995	PATHOGENIC
Chr14(GRCh37):g.24711460A>G	DDD	BENIGN	0.7	0	0.049	0.041	BENIGN
Chr14(GRCh37):g.29236874C>T	DDD	BENIGN	0.04	0	0.048	0.514	PATHOGENIC
Chr14(GRCh37):g.29237030C>G	DDD	PATHOGENIC	0	1	0.927	1	PATHOGENIC
Chr14(GRCh37):g.29237046C>G	DDD	PATHOGENIC	0.02	1	0.709	0.995	PATHOGENIC
Chr14(GRCh37):g.29237048C>A	DDD	PATHOGENIC	0	1	0.891	0.998	PATHOGENIC
Chr14(GRCh37):g.29237065A>T	DDD	PATHOGENIC	0	1	0.929	0.997	PATHOGENIC
Chr14(GRCh37):g.29237117T>C	DDD	PATHOGENIC	0	1	0.943	0.997	PATHOGENIC
Chr14(GRCh37):g.29237130C>A	DDD	PATHOGENIC	0	0.994	0.944	0.996	PATHOGENIC
Chr14(GRCh37):g.36986546G>T	DDD	BENIGN	0.01	0.215	0.473	0.959	PATHOGENIC
Chr14(GRCh37):g.36986817G>C	ACMG	PATHOGENIC	0	0.999	0.875	0.991	PATHOGENIC
Chr14(GRCh37):g.36987163G>C	DDD	PATHOGENIC	0.03	0.022	0.293	0.764	PATHOGENIC
Chr14(GRCh37):g.36989299C>G	DDD	BENIGN	0.01	0.95	0.469	0.955	PATHOGENIC
Chr14(GRCh37):g.45605503C>T	DDD	BENIGN	0	0.715	0.313	0.745	Benign
Chr14(GRCh37):g.45644816A>C	DDD	BENIGN	0	0.829	0.085	0.039	Benign
Chr14(GRCh37):g.51378517C>G	DDD	PATHOGENIC	0	1	0.98	0.159	Pathogenic
Chr14(GRCh37):g.54417055A>G	DDD	PATHOGENIC	0	0.999	0.96	1	PATHOGENIC
Chr14(GRCh37):g.54417366A>C	DDD	BENIGN	0	0.631	0.624	0.997	PATHOGENIC
Chr14(GRCh37):g.57269042C>T	DDD	BENIGN	0.01	1	0.901	0.999	PATHOGENIC
Chr14(GRCh37):g.61115388T>A	DDD	PATHOGENIC	0	1	0.97	1	PATHOGENIC
Chr14(GRCh37):g.61115846A>G	DDD	BENIGN	0	0.996	0.982	0.999	PATHOGENIC
Chr14(GRCh37):g.74551058T>C	Amish	BENIGN	0.364	0	0.137	0.259	BENIGN
Chr14(GRCh37):g.74766869C>G	Amish	BENIGN	0	0.981	0.635	0.076	Benign
Chr14(GRCh37):g.76429686C>T	DDD	PATHOGENIC	0	0.97	0.944	0.998	PATHOGENIC
Chr14(GRCh37):g.81422124G>A	Amish	BENIGN	0.92	0.049	0.389	0.05	Benign
Chr14(GRCh37):g.81609403T>C	ACMG	BENIGN	0.44	0	0.099	0.024	Benign
Chr14(GRCh37):g.81609930T>C	DDD	BENIGN	0	0.986	0.832	0.996	PATHOGENIC
Chr14(GRCh37):g.81610098G>A	ACMG	PATHOGENIC	0	0.997	0.581	0.944	Pathogenic
Chr14(GRCh37):g.81610201G>A	DDD	BENIGN	0	0.999	0.672	1	PATHOGENIC
Chr14(GRCh37):g.89338702A>G	DDD	PATHOGENIC	0.17	0.421	0.267	0.045	Benign
Chr14(GRCh37):g.102446848A>C	DDD	PATHOGENIC	0	0.973	0.461	0.992	PATHOGENIC
Chr14(GRCh37):g.102452177T>G	DDD	PATHOGENIC	0	0.124	0.17	0.906	PATHOGENIC
Chr14(GRCh37):g.102457927T>C	DDD	PATHOGENIC	0	0.093	0.544	0.982	PATHOGENIC
Chr14(GRCh37):g.102461335G>A	DDD	PATHOGENIC	0	0.986	0.667	0.982	PATHOGENIC
Chr14(GRCh37):g.102461359C>T	DDD	PATHOGENIC	0	0.976	0.642	0.983	Pathogenic
Chr14(GRCh37):g.102461384G>A	ACMG	PATHOGENIC	0	0.952	0.635	0.989	PATHOGENIC
Chr14(GRCh37):g.102463410G>C	DDD	PATHOGENIC	0	1	0.534	0.991	PATHOGENIC
Chr14(GRCh37):g.102466348C>A	DDD	PATHOGENIC	0	1	0.667	0.997	PATHOGENIC
Chr14(GRCh37):g.102467512G>A	DDD	PATHOGENIC	0	0.866	0.473	0.969	PATHOGENIC
Chr14(GRCh37):g.102467555T>G	DDD	PATHOGENIC	0	0.993	0.85	0.999	PATHOGENIC
Chr14(GRCh37):g.102472436C>A	DDD	PATHOGENIC	0	0.975	0.414	0.999	PATHOGENIC
Chr14(GRCh37):g.102473420A>T	DDD	PATHOGENIC	0.04	0.943	0.569	0.981	PATHOGENIC
Chr14(GRCh37):g.102476348T>C	DDD	PATHOGENIC	0	1	0.668	1	PATHOGENIC
Chr14(GRCh37):g.102483287G>T	DDD	PATHOGENIC	0	1	0.962	1	PATHOGENIC
Chr14(GRCh37):g.102494139C>T	DDD	BENIGN	0	1	0.427	1	PATHOGENIC
Chr14(GRCh37):g.102500320G>C	ACMG	PATHOGENIC	0	1	0.73	0.997	PATHOGENIC
Chr14(GRCh37):g.102500473G>A	DDD	PATHOGENIC	0	1	0.835	0.999	PATHOGENIC
Chr14(GRCh37):g.102502849C>A	DDD	PATHOGENIC	0	0.997	0.607	0.989	PATHOGENIC
Chr14(GRCh37):g.102504903C>T	DDD	PATHOGENIC	0	0.999	0.49	0.999	PATHOGENIC
Chr14(GRCh37):g.105238749G>A	DDD	BENIGN	0	0.987	0.651	0.997	PATHOGENIC
Chr14(GRCh37):g.105239673G>A	DDD	PATHOGENIC	0.02	0.871	0.275	0.951	PATHOGENIC
Chr14(GRCh37):g.105243045A>C	DDD	PATHOGENIC	0	0.959	0.647	1	PATHOGENIC
Chr15(GRCh37):g.26806242A>G	DDD	PATHOGENIC	0	0.998	0.955	0.999	PATHOGENIC
Chr15(GRCh37):g.26812874T>C	DDD	PATHOGENIC	0	1	0.925	0.998	PATHOGENIC
Chr15(GRCh37):g.26812875A>G	DDD	PATHOGENIC	0	1	0.864	0.993	PATHOGENIC
Chr15(GRCh37):g.31318390T>C	Amish	BENIGN	0	0.874	0.456	0.979	Pathogenic
Chr15(GRCh37):g.40707168G>A	DDD	PATHOGENIC	0.03	0.883	0.889	0.958	Pathogenic
Chr15(GRCh37):g.43895519T>G	Amish	BENIGN	0.02	0.164	0.208	0.065	Pathogenic
Chr15(GRCh37):g.48713824T>A	DDD	BENIGN	0.11	0.097	0.518	0.919	PATHOGENIC
Chr15(GRCh37):g.48733963A>G	DDD	PATHOGENIC	0	0.993	0.97	1	PATHOGENIC
Chr15(GRCh37):g.48738953T>C	DDD	PATHOGENIC	0.08	0.987	0.492	0.679	Pathogenic
Chr15(GRCh37):g.48741058A>G	DDD	PATHOGENIC	0	0.998	0.966	1	PATHOGENIC
Chr15(GRCh37):g.48755320G>A	DDD	PATHOGENIC	0	0.993	0.907	0.99	PATHOGENIC
Chr15(GRCh37):g.48755407T>C	DDD	PATHOGENIC	0	0.781	0.761	0.988	PATHOGENIC
Chr15(GRCh37):g.48760194C>G	DDD	BENIGN	0	0.999	0.894	0.999	PATHOGENIC
Chr15(GRCh37):g.48760713T>C	DDD	BENIGN	0.02	0.792	0.837	0.989	PATHOGENIC
Chr15(GRCh37):g.48797306C>A	DDD	PATHOGENIC	0	1	0.862	1	PATHOGENIC
Chr15(GRCh37):g.48905270G>A	DDD	PATHOGENIC	0	0.99	0.731	0.999	PATHOGENIC
Chr15(GRCh37):g.49030501G>A	DDD	BENIGN	0.04	0.009	0.035	0.01	Benign
Chr15(GRCh37):g.49033814G>C	DDD	PATHOGENIC	0.09	0.08	0.076	0.035	Pathogenic
Chr15(GRCh37):g.49060434T>C	DDD	PATHOGENIC	0.02	0.997	0.195	0.04	Pathogenic
Chr15(GRCh37):g.52643531C>T	Amish	BENIGN	0.01	0.466	0.216	0.922	Pathogenic
Chr15(GRCh37):g.57524938C>T	DDD	BENIGN	0.2	0.087	0.106	0.893	PATHOGENIC
Chr15(GRCh37):g.57554382C>G	DDD	BENIGN	0.48	0.923	0.252	0.962	PATHOGENIC
Chr15(GRCh37):g.66727483G>A	DDD	PATHOGENIC	0.06	0.638	0.697	0.98	PATHOGENIC
Chr15(GRCh37):g.66729115G>T	DDD	PATHOGENIC	0.02	0.536	0.831	0.988	PATHOGENIC
Chr15(GRCh37):g.66729163C>T	DDD	PATHOGENIC	0	0.999	0.909	0.998	PATHOGENIC
Chr15(GRCh37):g.67477070G>T	DDD	PATHOGENIC	0	0.998	0.978	1	PATHOGENIC
Chr15(GRCh37):g.67482774C>A	DDD	BENIGN	0.01	1	0.987	0.999	PATHOGENIC
Chr15(GRCh37):g.93499821C>T	DDD	PATHOGENIC	0	0.993	0.944	1	Pathogenic
Chr15(GRCh37):g.96875621G>T	DDD	PATHOGENIC	0	0.999	0.96	1	PATHOGENIC
Chr15(GRCh37):g.99491856A>T	DDD	BENIGN	0	0.864	0.776	0.99	PATHOGENIC
Chr15(GRCh37):g.99500622G>A	DDD	BENIGN	0	1	0.626	0.984	PATHOGENIC
Chr15(GRCh37):g.101438381G>T	DDD	PATHOGENIC	0	1	0.595	1	PATHOGENIC
Chr15(GRCh37):g.101448614A>T	DDD	PATHOGENIC	0.01	0.571	0.813	0.988	PATHOGENIC
Chr16(GRCh37):g.1245483A>T	Amish	BENIGN	0.108	0.953	0.693	0.976	PATHOGENIC
Chr16(GRCh37):g.1506165C>T	DDD	BENIGN	0.06	0.998	0.6	0.906	PATHOGENIC
Chr16(GRCh37):g.1552064C>T	DDD	BENIGN	0	0.786	0.228	0.583	Pathogenic
Chr16(GRCh37):g.2104408G>A	DDD	PATHOGENIC	0	1	0.918	0.999	PATHOGENIC
Chr16(GRCh37):g.2107157A>G	DDD	BENIGN	0	0.817	0.834	0.97	PATHOGENIC
Chr16(GRCh37):g.2347515G>A	Amish	BENIGN	0	0.945	0.845	0.909	Pathogenic
Chr16(GRCh37):g.3779148T>C	DDD	BENIGN	0.02	0.039	0.474	0.69	BENIGN
Chr16(GRCh37):g.3779446G>A	DDD	PATHOGENIC	0	0.99	0.674	0.997	PATHOGENIC
Chr16(GRCh37):g.3779448C>T	DDD	BENIGN	0.03	0.978	0.704	0.978	PATHOGENIC
Chr16(GRCh37):g.3779449G>A	DDD	PATHOGENIC	0	0.993	0.665	0.997	PATHOGENIC
Chr16(GRCh37):g.3779563G>C	DDD	PATHOGENIC	0	0.991	0.948	0.991	PATHOGENIC
Chr16(GRCh37):g.3779570G>C	DDD	PATHOGENIC	0	0.997	0.767	0.996	PATHOGENIC
Chr16(GRCh37):g.3779682T>C	DDD	PATHOGENIC	0.03	0.989	0.578	0.934	PATHOGENIC
Chr16(GRCh37):g.3779686C>T	DDD	PATHOGENIC	0.01	0.996	0.606	0.954	PATHOGENIC
Chr16(GRCh37):g.3779836G>T	DDD	PATHOGENIC	0	0.988	0.814	0.997	PATHOGENIC
Chr16(GRCh37):g.3781237A>T	DDD	PATHOGENIC	0	0.994	0.979	0.999	PATHOGENIC
Chr16(GRCh37):g.3781471A>C	DDD	PATHOGENIC	0	0.992	0.96	0.99	PATHOGENIC
Chr16(GRCh37):g.3781900G>C	DDD	PATHOGENIC	0.25	0.995	0.46	0.725	BENIGN
Chr16(GRCh37):g.3786141C>G	DDD	PATHOGENIC	0	1	0.98	0.999	PATHOGENIC
Chr16(GRCh37):g.3786769T>C	DDD	PATHOGENIC	0	0.998	0.958	0.992	PATHOGENIC
Chr16(GRCh37):g.3786790C>A	DDD	PATHOGENIC	0	0.997	0.966	0.999	PATHOGENIC
Chr16(GRCh37):g.3788657A>G	DDD	PATHOGENIC	0	0.998	0.962	0.999	PATHOGENIC
Chr16(GRCh37):g.3789635G>C	DDD	PATHOGENIC	0	0.999	0.89	0.999	PATHOGENIC
Chr16(GRCh37):g.3795291T>G	DDD	BENIGN	0.01	0.088	0.643	0.908	PATHOGENIC
Chr16(GRCh37):g.3795325C>G	DDD	BENIGN	0	0.007	0.471	0.954	PATHOGENIC
Chr16(GRCh37):g.3799632C>T	DDD	PATHOGENIC	0	0.972	0.961	0.996	PATHOGENIC
Chr16(GRCh37):g.3807919T>C	DDD	PATHOGENIC	0	1	0.752	1	PATHOGENIC
Chr16(GRCh37):g.3828173T>C	DDD	PATHOGENIC	0	1	0.948	0.998	PATHOGENIC
Chr16(GRCh37):g.3828768C>T	DDD	PATHOGENIC	0	1	0.911	1	PATHOGENIC
Chr16(GRCh37):g.3900847G>C	DDD	BENIGN	0.09	0.339	0.306	0.839	PATHOGENIC
Chr16(GRCh37):g.9857073C>T	DDD	BENIGN	0	0.987	0.3	0.963	PATHOGENIC
Chr16(GRCh37):g.9857299G>A	DDD	PATHOGENIC	0.01	0.046	0.173	0.85	PATHOGENIC
Chr16(GRCh37):g.9862854T>C	DDD	PATHOGENIC	0	0.926	0.751	0.99	PATHOGENIC
Chr16(GRCh37):g.9923330T>C	DDD	PATHOGENIC	0	0.926	0.621	0.989	PATHOGENIC
Chr16(GRCh37):g.9923440G>A	DDD	PATHOGENIC	0	0.996	0.635	0.998	PATHOGENIC
Chr16(GRCh37):g.16248755C>T	ACMG	PATHOGENIC	0	0.987	0.826	0.993	Pathogenic
Chr16(GRCh37):g.16256943C>T	ACMG	PATHOGENIC	0.01	1	0.958	0.984	Pathogenic
Chr16(GRCh37):g.16256967G>A	ACMG	PATHOGENIC	0.03	0.397	0.796	0.944	Pathogenic
Chr16(GRCh37):g.16259595C>G	ACMG	PATHOGENIC	0.05	0.965	0.685	0.673	Pathogenic
Chr16(GRCh37):g.16259598A>C	ACMG	PATHOGENIC	0	0.851	0.898	0.939	Pathogenic
Chr16(GRCh37):g.16272792G>A	ACMG	PATHOGENIC	0	1	0.88	0.994	Pathogenic
Chr16(GRCh37):g.16295863T>C	DDD	BENIGN	0	1	0.847	0.063	Benign
Chr16(GRCh37):g.16295943G>C	ACMG	PATHOGENIC	0	0.959	0.816	0.971	Pathogenic
Chr16(GRCh37):g.17292204G>A	DDD	BENIGN	0	0.688	0.296	0.051	Pathogenic
Chr16(GRCh37):g.23555992C>T	ACMG	PATHOGENIC	0	0.999	0.53	0.95	Pathogenic
Chr16(GRCh37):g.23555998G>A	ACMG	PATHOGENIC	0.03	0.849	0.191	0.238	Pathogenic
Chr16(GRCh37):g.28500649T>C	DDD	PATHOGENIC	0.02	0.938	0.751	0.97	PATHOGENIC
Chr16(GRCh37):g.29810459G>T	DDD	BENIGN	0.01	0.765	0.411	0.911	PATHOGENIC
Chr16(GRCh37):g.29810591C>G	DDD	BENIGN	0.13	0.18	0.255	0.463	PATHOGENIC
Chr16(GRCh37):g.29816211T>G	DDD	BENIGN	0	0.991	0.408	0.813	PATHOGENIC
Chr16(GRCh37):g.29825730T>C	DDD	BENIGN	0.09	0.994	0.619	0.764	PATHOGENIC
Chr16(GRCh37):g.30718647C>G	DDD	BENIGN	0.02	0.998	0.761	0.786	BENIGN
Chr16(GRCh37):g.30721265A>G	DDD	BENIGN	0.14	0.013	0.237	0.678	BENIGN
Chr16(GRCh37):g.30732182C>G	DDD	BENIGN	0.03	0.005	0.254	0.47	BENIGN
Chr16(GRCh37):g.30732258T>C	DDD	PATHOGENIC	0.08	0.451	0.43	0.514	BENIGN
Chr16(GRCh37):g.30749144G>A	DDD	BENIGN	0.2	0.001	0.241	0.03	BENIGN
Chr16(GRCh37):g.30750201A>C	DDD	BENIGN	0.01	0.039	0.318	0.401	BENIGN
Chr16(GRCh37):g.30750390C>A	DDD	BENIGN	0	0.781	0.495	0.73	BENIGN
Chr16(GRCh37):g.51172838C>A	DDD	BENIGN	0.01	0.87	0.325	0.94	PATHOGENIC
Chr16(GRCh37):g.51173308G>T	DDD	PATHOGENIC	0	0.786	0.465	0.951	PATHOGENIC
Chr16(GRCh37):g.51175270T>C	DDD	BENIGN	0.02	0.715	0.324	0.978	PATHOGENIC
Chr16(GRCh37):g.53686702A>G	DDD	PATHOGENIC	0	1	0.967	1	PATHOGENIC
Chr16(GRCh37):g.56309901T>G	DDD	PATHOGENIC	0	0.754	0.932	0.998	PATHOGENIC
Chr16(GRCh37):g.56370674C>T	DDD	PATHOGENIC	0	1	0.888	1	Pathogenic
Chr16(GRCh37):g.56545126C>T	DDD	PATHOGENIC	0	1	0.974	0.999	PATHOGENIC
Chr16(GRCh37):g.67654615C>T	DDD	PATHOGENIC	0	0.998	0.401	0.998	PATHOGENIC
Chr16(GRCh37):g.67654646C>T	DDD	PATHOGENIC	0	0.999	0.526	1	PATHOGENIC
Chr16(GRCh37):g.68390608G>A	Amish	BENIGN	0	0.978	0.571	0.956	Pathogenic
Chr16(GRCh37):g.68842602T>G	DDD	PATHOGENIC	0	0.971	0.247	0.949	PATHOGENIC
Chr16(GRCh37):g.70548243T>C	Amish	BENIGN	0.52	0.003	0.054	0.021	Benign
Chr16(GRCh37):g.79632907T>A	DDD	PATHOGENIC	0	0.924	0.967	0.999	PATHOGENIC
Chr16(GRCh37):g.79632908T>A	DDD	PATHOGENIC	0	0.997	0.957	1	PATHOGENIC
Chr16(GRCh37):g.79633616T>G	DDD	PATHOGENIC	0	0.997	0.835	0.98	PATHOGENIC
Chr16(GRCh37):g.86601069G>A	DDD	BENIGN	0	0.17	0.357	0.9	PATHOGENIC
Chr16(GRCh37):g.86601237A>G	DDD	PATHOGENIC	0	1	0.898	0.999	PATHOGENIC
Chr16(GRCh37):g.89341503G>A	DDD	PATHOGENIC	0	0.997	0.463	0.996	PATHOGENIC
Chr16(GRCh37):g.89341506C>T	DDD	PATHOGENIC	0	0.996	0.391	0.999	PATHOGENIC
Chr16(GRCh37):g.89347661C>A	DDD	BENIGN	0.07	0.323	0.194	0.953	PATHOGENIC
Chr16(GRCh37):g.89349516C>G	DDD	BENIGN	0	0.617	0.115	0.91	BENIGN
Chr16(GRCh37):g.89350104C>A	DDD	BENIGN	0	0.125	0.061	0.898	PATHOGENIC
Chr16(GRCh37):g.89825107G>C	DDD	BENIGN	0.15	0.017	0.156	0.005	Benign
Chr16(GRCh37):g.90001151G>A	DDD	PATHOGENIC	0.03	0.918	0.908	0.997	PATHOGENIC
Chr16(GRCh37):g.90001505A>G	DDD	PATHOGENIC	0.03	0.879	0.679	0.986	PATHOGENIC
Chr16(GRCh37):g.90001548C>T	DDD	PATHOGENIC	0	0.929	0.769	0.999	PATHOGENIC
Chr16(GRCh37):g.90001622G>A	DDD	PATHOGENIC	0.02	0.52	0.488	0.9	PATHOGENIC
Chr16(GRCh37):g.90001644G>A	ACMG	PATHOGENIC	0.01	0.276	0.872	0.998	Pathogenic
Chr16(GRCh37):g.90001721G>A	DDD	PATHOGENIC	0.01	0.302	0.873	0.997	PATHOGENIC
Chr16(GRCh37):g.90002022T>C	DDD	PATHOGENIC	0.01	0.653	0.892	0.992	PATHOGENIC
Chr16(GRCh37):g.90002087G>A	DDD	PATHOGENIC	0	0.204	0.702	0.942	PATHOGENIC
Chr17(GRCh37):g.6337280T>A	ACMG	PATHOGENIC	0.02	0.998	0.827	0.977	PATHOGENIC
Chr17(GRCh37):g.10535794T>C	DDD	PATHOGENIC	0.04	0.158	0.502	0.817	PATHOGENIC
Chr17(GRCh37):g.10544635G>A	DDD	PATHOGENIC	0	1	0.908	0.996	PATHOGENIC
Chr17(GRCh37):g.10545737C>A	DDD	BENIGN	0	0.062	0.38	0.887	PATHOGENIC
Chr17(GRCh37):g.10550528A>C	DDD	PATHOGENIC	0.01	0.916	0.936	0.981	PATHOGENIC
Chr17(GRCh37):g.10551908G>T	ACMG	PATHOGENIC	0	0.214	0.846	0.95	PATHOGENIC
Chr17(GRCh37):g.16843009G>A	DDD	BENIGN	0.12	0.019	0.384	0.089	BENIGN
Chr17(GRCh37):g.16843729G>T	DDD	BENIGN	0	0.395	0.607	0.057	Benign
Chr17(GRCh37):g.16852187A>G	DDD	BENIGN	0	0.999	0.919	0.051	Pathogenic
Chr17(GRCh37):g.17699015G>A	DDD	BENIGN	0.01	0.804	0.215	0.874	PATHOGENIC
Chr17(GRCh37):g.17699606T>G	DDD	BENIGN	0	0.916	0.199	0.816	PATHOGENIC
Chr17(GRCh37):g.18046138G>A	DDD	PATHOGENIC	0.23	0.001	0.264	0.032	Benign
Chr17(GRCh37):g.27064442G>A	DDD	PATHOGENIC	0	1	0.802	0.999	Pathogenic
Chr17(GRCh37):g.27064957T>G	DDD	PATHOGENIC	0.07	0.861	0.84	0.995	BENIGN
Chr17(GRCh37):g.27581345C>G	DDD	PATHOGENIC	0	0.999	0.962	1	PATHOGENIC
Chr17(GRCh37):g.29509609A>G	DDD	BENIGN	0.02	0.103	0.498	0.88	PATHOGENIC
Chr17(GRCh37):g.29557865A>C	DDD	PATHOGENIC	0	0.987	0.497	0.998	PATHOGENIC
Chr17(GRCh37):g.29560068T>A	DDD	PATHOGENIC	0	0.993	0.838	0.997	PATHOGENIC
Chr17(GRCh37):g.29562716G>C	DDD	BENIGN	0.07	0.51	0.599	0.812	PATHOGENIC
Chr17(GRCh37):g.29562761G>A	DDD	BENIGN	0.14	0.838	0.645	0.972	PATHOGENIC
Chr17(GRCh37):g.29562973C>T	DDD	BENIGN	0.03	0.998	0.828	0.999	PATHOGENIC
Chr17(GRCh37):g.29653076T>G	DDD	BENIGN	0.02	0.763	0.632	0.941	PATHOGENIC
Chr17(GRCh37):g.29653081T>G	DDD	BENIGN	0.01	0.929	0.373	0.971	PATHOGENIC
Chr17(GRCh37):g.29654736C>T	DDD	PATHOGENIC	0	0.991	0.919	0.999	Pathogenic
Chr17(GRCh37):g.29661926G>C	DDD	BENIGN	0.01	0.677	0.715	0.974	PATHOGENIC
Chr17(GRCh37):g.33902899A>G	ACMG	PATHOGENIC	0	0.999	0.943	1	PATHOGENIC
Chr17(GRCh37):g.36059141T>C	ACMG	BENIGN	0	0.977	0.903	0.617	Benign
Chr17(GRCh37):g.36093645C>G	ACMG	PATHOGENIC	0	0.934	0.914	0.987	PATHOGENIC
Chr17(GRCh37):g.36895854G>A	DDD	PATHOGENIC	0.03	0.052	0.261	0.93	PATHOGENIC
Chr17(GRCh37):g.37840962G>A	DDD	PATHOGENIC	0	1	0.898	0.972	Pathogenic
Chr17(GRCh37):g.38244592T>C	DDD	PATHOGENIC	0	0.999	0.954	0.997	PATHOGENIC
Chr17(GRCh37):g.42929088C>T	ACMG	PATHOGENIC	0	0.999	0.517	1	PATHOGENIC
Chr17(GRCh37):g.42930943C>T	DDD	BENIGN	0	1	0.595	1	PATHOGENIC
Chr17(GRCh37):g.42931646A>G	ACMG	PATHOGENIC	0	0.989	0.805	1	PATHOGENIC
Chr17(GRCh37):g.42931982G>T	DDD	BENIGN	0	0.987	0.72	0.993	PATHOGENIC
Chr17(GRCh37):g.42937867A>G	ACMG	PATHOGENIC	0	0.998	0.684	0.999	PATHOGENIC
Chr17(GRCh37):g.42949852G>A	DDD	BENIGN	0	0.992	0.566	1	PATHOGENIC
Chr17(GRCh37):g.42953387G>A	DDD	PATHOGENIC	0	1	0.862	1	PATHOGENIC
Chr17(GRCh37):g.42957006C>T	DDD	PATHOGENIC	0	1	0.982	1	PATHOGENIC
Chr17(GRCh37):g.42992593G>A	ACMG	PATHOGENIC	0	1	0.942	0.998143	Pathogenic
Chr17(GRCh37):g.44248467C>T	DDD	BENIGN	0.03	0.636	0.151	0.508	PATHOGENIC
Chr17(GRCh37):g.48271350C>T	DDD	BENIGN	0	0.994	0.825	0.811	Pathogenic
Chr17(GRCh37):g.48276603G>C	DDD	BENIGN	0.1	0.588	0.591	0.949	PATHOGENIC
Chr17(GRCh37):g.48676795G>A	Amish	BENIGN	0.4	0	0.152	0.017	Benign
Chr17(GRCh37):g.48677099G>C	Amish	BENIGN	0.22	0.012	0.505	0.291	Benign
Chr17(GRCh37):g.48703745G>A	Amish	BENIGN	0.19	0.003	0.328	0.2	Benign
Chr17(GRCh37):g.48704026G>A	Amish	BENIGN	0	0.219	0.165	0.882	Benign
Chr17(GRCh37):g.54672093C>T	DDD	PATHOGENIC	0	0.999	0.952	1	PATHOGENIC
Chr17(GRCh37):g.59557656T>G	DDD	BENIGN	0.49	0.942	0.203	0.855	PATHOGENIC
Chr17(GRCh37):g.62018378C>A	DDD	BENIGN	0.01	0.825	0.721	0.973	PATHOGENIC
Chr17(GRCh37):g.62018592T>G	DDD	BENIGN	0	0.995	0.971	0.997	PATHOGENIC
Chr17(GRCh37):g.62018878G>C	DDD	BENIGN	0	0.98	0.688	0.994	PATHOGENIC
Chr17(GRCh37):g.62020258C>A	DDD	BENIGN	0.27	0.336	0.566	0.975	PATHOGENIC
Chr17(GRCh37):g.62028876T>A	DDD	BENIGN	0.21	0.525	0.486	0.797	PATHOGENIC
Chr17(GRCh37):g.66519911A>G	DDD	BENIGN	0.18	0.014	0.281	0.865	PATHOGENIC
Chr17(GRCh37):g.66526439A>G	ACMG	PATHOGENIC	0.04	0.011	0.369	0.775	PATHOGENIC
Chr17(GRCh37):g.70118906C>G	DDD	PATHOGENIC	0.01	0.029	0.794	0.989	PATHOGENIC
Chr17(GRCh37):g.70118937C>G	ACMG	PATHOGENIC	0	0.999	0.961	1	Pathogenic
Chr17(GRCh37):g.71196139C>T	DDD	BENIGN	0.02	0.935	0.246	0.021	Benign
Chr17(GRCh37):g.73518125G>C	DDD	BENIGN	0.27	0.422	0.151	0.569	PATHOGENIC
Chr17(GRCh37):g.78055376G>A	Amish	BENIGN	0.71	0	0.029	0.017	Benign
Chr17(GRCh37):g.78172347C>T	DDD	BENIGN	0.23	0.557	0.165	0.09	Benign
Chr17(GRCh37):g.79477793T>G	DDD	PATHOGENIC	0	0.987	0.903	0.998	PATHOGENIC
Chr17(GRCh37):g.79477798A>G	DDD	PATHOGENIC	0.02	0.999	0.972	0.997	PATHOGENIC
Chr17(GRCh37):g.79478442T>A	DDD	PATHOGENIC	0.01	0.98	0.936	0.977	PATHOGENIC
Chr17(GRCh37):g.80789322G>T	DDD	BENIGN	0.15	0.56	0.07	0.309	BENIGN
Chr17(GRCh37):g.80790038A>C	DDD	BENIGN	0.05	0.031	0.03	0.146	PATHOGENIC
Chr17(GRCh37):g.80842061T>G	ACMG	PATHOGENIC	0	0.999	0.589	1	PATHOGENIC
Chr18(GRCh37):g.2667009A>T	DDD	PATHOGENIC	0	0.996	0.304	0.982	PATHOGENIC
Chr18(GRCh37):g.2697047A>G	DDD	PATHOGENIC	0	0.997	0.67	0.997	PATHOGENIC
Chr18(GRCh37):g.3457679C>T	DDD	BENIGN	0.01	0.535	0.078	0.567	PATHOGENIC
Chr18(GRCh37):g.19761507A>G	ACMG	PATHOGENIC	0	1	0.935	1	Pathogenic
Chr18(GRCh37):g.19761528A>G	ACMG	PATHOGENIC	0	0.999	0.97	1	PATHOGENIC
Chr18(GRCh37):g.28914021G>T	DDD	BENIGN	0	0.649	0.181	0.094	Benign
Chr18(GRCh37):g.28934767G>A	DDD	BENIGN	0.15	0.946	0.488	0.034	Benign
Chr18(GRCh37):g.31320165C>T	DDD	BENIGN	0.02	0.998	0.23	0.855	Benign
Chr18(GRCh37):g.42531175A>G	DDD	BENIGN	0.09	0.546	0.203	0.772	PATHOGENIC
Chr18(GRCh37):g.42531866C>G	DDD	PATHOGENIC	0	0.999	0.597	0.984	PATHOGENIC
Chr18(GRCh37):g.42531877G>A	DDD	PATHOGENIC	0	0.997	0.633	0.996	PATHOGENIC
Chr18(GRCh37):g.42531913G>A	ACMG	PATHOGENIC	0	1	0.716	0.999083	Pathogenic
Chr18(GRCh37):g.42531914G>A	DDD	PATHOGENIC	0	1	0.72	0.997	PATHOGENIC
Chr18(GRCh37):g.43447589A>G	DDD	PATHOGENIC	0.24	0.053	0.113	0.304	BENIGN
Chr18(GRCh37):g.47363917A>G	Amish	BENIGN	0.05	0.012	0.085	0.046	Benign
Chr18(GRCh37):g.48575195C>T	DDD	PATHOGENIC	0	1	0.964	0.998	PATHOGENIC
Chr18(GRCh37):g.48604676A>G	DDD	PATHOGENIC	0.1	0.984	0.71	0.713	Pathogenic
Chr18(GRCh37):g.52896116G>A	DDD	PATHOGENIC	0	0.996	0.959	1	PATHOGENIC
Chr18(GRCh37):g.52896230C>T	DDD	PATHOGENIC	0	0.692	0.943	0.999	PATHOGENIC
Chr18(GRCh37):g.52899785T>C	DDD	PATHOGENIC	0.03	0.98	0.42	0.973	PATHOGENIC
Chr18(GRCh37):g.52924546C>G	DDD	PATHOGENIC	0	0.999	0.251	0.98	PATHOGENIC
Chr18(GRCh37):g.52942880G>C	DDD	PATHOGENIC	0.04	0.917	0.139	0.952	PATHOGENIC
Chr18(GRCh37):g.56936571C>T	DDD	BENIGN	0.06	0.007	0.114	0.284	BENIGN
Chr18(GRCh37):g.59810570A>C	DDD	PATHOGENIC	0	1	0.699	0.839	Pathogenic
Chr18(GRCh37):g.59814205C>G	DDD	PATHOGENIC	0	0.981	0.61	1	PATHOGENIC
Chr18(GRCh37):g.59824980G>A	DDD	PATHOGENIC	0	1	0.79	0.999	PATHOGENIC
Chr18(GRCh37):g.67684696A>G	DDD	PATHOGENIC	0.12	0.301	0.384	0.967	PATHOGENIC
Chr19(GRCh37):g.1105690G>A	DDD	BENIGN	0.03	0.381	0.154	0.027	Benign
Chr19(GRCh37):g.3110171C>T	ACMG	PATHOGENIC	0.02	1	0.967	0.999	PATHOGENIC
Chr19(GRCh37):g.3110188C>T	ACMG	PATHOGENIC	0	0.999	0.855	1	Pathogenic
Chr19(GRCh37):g.3110189G>A	ACMG	PATHOGENIC	0	0.995	0.927	0.996	PATHOGENIC
Chr19(GRCh37):g.3113410T>G	DDD	BENIGN	0	0.978	0.973	0.999	PATHOGENIC
Chr19(GRCh37):g.3121115G>A	ACMG	PATHOGENIC	0	0.996	0.857	0.998	PATHOGENIC
Chr19(GRCh37):g.4095446G>A	DDD	BENIGN	0	0.843	0.737	0.994	PATHOGENIC
Chr19(GRCh37):g.6495282C>T	DDD	PATHOGENIC	0	0.997	0.946	0.995	Pathogenic
Chr19(GRCh37):g.6495348T>C	DDD	PATHOGENIC	0	0.979	0.946	0.998	PATHOGENIC
Chr19(GRCh37):g.6502220G>A	DDD	PATHOGENIC	0	0.894	0.868	0.999	PATHOGENIC
Chr19(GRCh37):g.7120751A>T	ACMG	PATHOGENIC	0	0.998	0.959	0.997	PATHOGENIC
Chr19(GRCh37):g.7122683A>C	ACMG	PATHOGENIC	0	0.955	0.932	1	PATHOGENIC
Chr19(GRCh37):g.7122903C>T	ACMG	PATHOGENIC	0	0.999	0.925	1	PATHOGENIC
Chr19(GRCh37):g.7125388G>A	ACMG	PATHOGENIC	0	0.995	0.94	0.991	PATHOGENIC
Chr19(GRCh37):g.7132241G>C	ACMG	PATHOGENIC	0.01	0.019	0.351	0.992	Pathogenic
Chr19(GRCh37):g.7184387A>T	ACMG	PATHOGENIC	0.02	0.985	0.824	0.991	PATHOGENIC
Chr19(GRCh37):g.7184535G>A	ACMG	PATHOGENIC	0	0.989	0.894	0.999	Pathogenic
Chr19(GRCh37):g.7184595G>A	ACMG	PATHOGENIC	0.02	0.997	0.816	0.998	PATHOGENIC
Chr19(GRCh37):g.7594571G>C	DDD	PATHOGENIC	0	0.999	0.698	1	PATHOGENIC
Chr19(GRCh37):g.11100042G>A	DDD	PATHOGENIC	0.01	0.95	0.76	0.989	PATHOGENIC
Chr19(GRCh37):g.11101951G>C	DDD	PATHOGENIC	0	0.979	0.305	0.97	PATHOGENIC
Chr19(GRCh37):g.11129674C>T	DDD	PATHOGENIC	0	0.999	0.934	1	PATHOGENIC
Chr19(GRCh37):g.11132405G>A	DDD	BENIGN	0.06	0.581	0.662	0.885	PATHOGENIC
Chr19(GRCh37):g.11134267G>A	DDD	PATHOGENIC	0	0.998	0.97	1	PATHOGENIC
Chr19(GRCh37):g.11136144G>T	DDD	PATHOGENIC	0.02	0.631	0.892	0.983	PATHOGENIC
Chr19(GRCh37):g.11143988C>T	DDD	PATHOGENIC	0	0.936	0.769	0.994	PATHOGENIC
Chr19(GRCh37):g.11144026C>T	DDD	PATHOGENIC	0	0.931	0.955	0.999	PATHOGENIC
Chr19(GRCh37):g.11311134G>A	DDD	BENIGN	0	0.999	0.493	0.994	Pathogenic
Chr19(GRCh37):g.11361753G>A	DDD	BENIGN	0.03	0.453	0.091	0.121	Pathogenic
Chr19(GRCh37):g.12996586A>G	DDD	BENIGN	0.07	0.001	0.016	0.889	PATHOGENIC
Chr19(GRCh37):g.13135920G>T	DDD	PATHOGENIC	0	0.991	0.772	0.998	PATHOGENIC
Chr19(GRCh37):g.13135989T>C	DDD	PATHOGENIC	0	0.997	0.508	0.994	PATHOGENIC
Chr19(GRCh37):g.13136153C>G	DDD	PATHOGENIC	0	0.991	0.759	0.995	PATHOGENIC
Chr19(GRCh37):g.13136153C>T	DDD	PATHOGENIC	0	0.996	0.752	0.999	PATHOGENIC
Chr19(GRCh37):g.13136154G>A	DDD	PATHOGENIC	0	0.984	0.765	0.998	PATHOGENIC
Chr19(GRCh37):g.13372340C>T	DDD	PATHOGENIC	0	0.994	0.889	0.998	PATHOGENIC
Chr19(GRCh37):g.13387885T>C	ACMG	PATHOGENIC	0	0.986	0.981	0.999	PATHOGENIC
Chr19(GRCh37):g.15289665C>A	ACMG	BENIGN	0.36	0.01	0.327	0.079	Pathogenic
Chr19(GRCh37):g.15290279C>T	ACMG	PATHOGENIC	0	1	0.905	0.999	PATHOGENIC
Chr19(GRCh37):g.15291550C>G	ACMG	PATHOGENIC	0.01	1	0.718	1	PATHOGENIC
Chr19(GRCh37):g.15291834T>G	ACMG	BENIGN	0.35	0.005	0.569	0.009	Benign
Chr19(GRCh37):g.15300140C>A	ACMG	PATHOGENIC	0	1	0.966	1	PATHOGENIC
Chr19(GRCh37):g.15302340A>T	ACMG	PATHOGENIC	0	1	0.968	1	PATHOGENIC
Chr19(GRCh37):g.15303289T>G	ACMG	PATHOGENIC	0.01	0.441	0.85	0.945	PATHOGENIC
Chr19(GRCh37):g.18897414G>T	DDD	BENIGN	0.05	0.026	0.419	0.892	PATHOGENIC
Chr19(GRCh37):g.18899268T>A	DDD	PATHOGENIC	0	0.999	0.891	0.999	PATHOGENIC
Chr19(GRCh37):g.18899667G>T	DDD	BENIGN	0	1	0.844	0.996	PATHOGENIC
Chr19(GRCh37):g.36210419C>T	Amish	BENIGN	0	0.99	0.452	0.715	Pathogenic
Chr19(GRCh37):g.36333296G>A	DDD	PATHOGENIC	0	0.964	0.321	0.929	Pathogenic
Chr19(GRCh37):g.36341311T>A	DDD	BENIGN	0.1	0.345	0.254	0.005	Benign
Chr19(GRCh37):g.38990639T>C	ACMG	PATHOGENIC	0	0.986	0.948	0.997	PATHOGENIC
Chr19(GRCh37):g.39001402G>C	ACMG	PATHOGENIC	0	0.986	0.367	0.99	PATHOGENIC
Chr19(GRCh37):g.39070680T>A	ACMG	PATHOGENIC	0	0.987	0.938	0.985082	Pathogenic
Chr19(GRCh37):g.39997739G>A	ACMG	PATHOGENIC	0	1	0.97	0.995	Pathogenic
Chr19(GRCh37):g.39997831T>C	ACMG	PATHOGENIC	0.02	0.942	0.611	0.965	PATHOGENIC
Chr19(GRCh37):g.39997852G>C	ACMG	PATHOGENIC	0	0.994	0.879	0.997	PATHOGENIC
Chr19(GRCh37):g.42474565A>T	DDD	PATHOGENIC	0	0.998	0.976	1	PATHOGENIC
Chr19(GRCh37):g.42474691C>T	DDD	PATHOGENIC	0.02	1	0.976	1	Pathogenic
Chr19(GRCh37):g.42479882C>T	DDD	PATHOGENIC	0	1	0.936	1	PATHOGENIC
Chr19(GRCh37):g.42479928C>T	DDD	PATHOGENIC	0	1	0.969	1	PATHOGENIC
Chr19(GRCh37):g.42489096G>A	DDD	PATHOGENIC	0	1	0.968	1	PATHOGENIC
Chr19(GRCh37):g.42489099C>T	DDD	PATHOGENIC	0.03	0.997	0.65	0.949	PATHOGENIC
Chr19(GRCh37):g.42489105C>T	DDD	PATHOGENIC	0	0.991	0.889	0.999	PATHOGENIC
Chr19(GRCh37):g.42489164G>A	DDD	BENIGN	0	0.978	0.862	0.996	PATHOGENIC
Chr19(GRCh37):g.42492179C>G	DDD	PATHOGENIC	0.01	0.628	0.768	0.997	PATHOGENIC
Chr19(GRCh37):g.42752762G>A	DDD	BENIGN	0.01	0.003	0.065	0.17	PATHOGENIC
Chr19(GRCh37):g.42754086T>C	DDD	PATHOGENIC	0	0.999	0.764	0.999	PATHOGENIC
Chr19(GRCh37):g.42754484G>A	DDD	PATHOGENIC	0	0.976	0.765	0.999	PATHOGENIC
Chr19(GRCh37):g.42754493G>A	DDD	PATHOGENIC	0	0.999	0.792	1	PATHOGENIC
Chr19(GRCh37):g.42754583C>T	DDD	PATHOGENIC	0	1	0.656	0.999	PATHOGENIC
Chr19(GRCh37):g.46270372C>T	DDD	BENIGN	0.1	0.17	0.242	0.458	PATHOGENIC
Chr19(GRCh37):g.46271870G>A	DDD	BENIGN	0.02	0.039	0.19	0.717	PATHOGENIC
Chr19(GRCh37):g.46280634T>C	DDD	BENIGN	0	0.955	0.389	0.981	PATHOGENIC
Chr19(GRCh37):g.46280932T>C	DDD	BENIGN	0	0.997	0.358	0.972	PATHOGENIC
Chr19(GRCh37):g.50831882G>A	DDD	BENIGN	0	0.998	0.81	0.996	PATHOGENIC
Chr19(GRCh37):g.52715971C>T	DDD	PATHOGENIC	0.02	0.428	0.38	1	Pathogenic
Chr19(GRCh37):g.52715979C>T	DDD	PATHOGENIC	0	1	0.503	1	Pathogenic
Chr19(GRCh37):g.52716214G>A	ACMG	PATHOGENIC	0	0.995	0.455	0.999	PATHOGENIC
Chr19(GRCh37):g.54646887G>C	DDD	PATHOGENIC	0	0.997	0.698	0.982	PATHOGENIC
Chr19(GRCh37):g.54649412C>T	DDD	PATHOGENIC	0.01	0.998	0.61	0.994	PATHOGENIC
Chr20(GRCh37):g.472926T>C	DDD	PATHOGENIC	0.06	0.701	0.387	0.953	Pathogenic
Chr20(GRCh37):g.472997T>C	DDD	PATHOGENIC	0	0.974	0.381	0.987	PATHOGENIC
Chr20(GRCh37):g.9318679C>T	DDD	BENIGN	0.69	0.827	0.15	0.682	PATHOGENIC
Chr20(GRCh37):g.9370598C>G	DDD	BENIGN	0.02	0.998	0.66	0.999	PATHOGENIC
Chr20(GRCh37):g.9449313G>T	DDD	BENIGN	0.11	0.146	0.356	0.978	Pathogenic
Chr20(GRCh37):g.10639235T>C	ACMG	PATHOGENIC	0	0.993	0.899	0.996	PATHOGENIC
Chr20(GRCh37):g.10639259C>G	ACMG	PATHOGENIC	0	1	0.975	1	PATHOGENIC
Chr20(GRCh37):g.10653511G>T	ACMG	PATHOGENIC	0.17	0.09	0.624	0.829	PATHOGENIC
Chr20(GRCh37):g.31019248G>C	DDD	BENIGN	0	0.984	0.377	0.997	PATHOGENIC
Chr20(GRCh37):g.43036089G>T	ACMG	PATHOGENIC	0	1	0.971	1	PATHOGENIC
Chr20(GRCh37):g.43036101G>A	ACMG	PATHOGENIC	0	1	0.969	0.999	PATHOGENIC
Chr20(GRCh37):g.43042355G>A	ACMG	PATHOGENIC	0.05	0.418	0.869	0.972	Pathogenic
Chr20(GRCh37):g.43043250T>A	ACMG	PATHOGENIC	0	0.999	0.978	0.999	PATHOGENIC
Chr20(GRCh37):g.43047084A>G	ACMG	PATHOGENIC	0.04	0.992	0.923	0.998	PATHOGENIC
Chr20(GRCh37):g.43047107G>A	ACMG	PATHOGENIC	0	1	0.818	1	PATHOGENIC
Chr20(GRCh37):g.43048471G>A	DDD	BENIGN	0.02	0.309	0.723	0.995	PATHOGENIC
Chr20(GRCh37):g.43052757G>A	ACMG	PATHOGENIC	0	0.991	0.765	0.988	Pathogenic
Chr20(GRCh37):g.43052757G>T	ACMG	PATHOGENIC	0	0.958	0.834	0.994	PATHOGENIC
Chr20(GRCh37):g.43052769G>T	ACMG	PATHOGENIC	0	0.993	0.919	0.999	Pathogenic
Chr20(GRCh37):g.43052871T>C	ACMG	PATHOGENIC	0	0.998	0.96	0.99	PATHOGENIC
Chr20(GRCh37):g.43058189C>T	ACMG	BENIGN	0.03	0.997	0.237	0.127	Benign
Chr20(GRCh37):g.44054311G>A	DDD	PATHOGENIC	0	1	0.588	0.99	Pathogenic
Chr20(GRCh37):g.47990924T>G	DDD	PATHOGENIC	0	0.999	0.792	0.999	PATHOGENIC
Chr20(GRCh37):g.47991133A>G	DDD	BENIGN	0.01	0.781	0.844	0.991	PATHOGENIC
Chr20(GRCh37):g.50401008C>A	DDD	BENIGN	0.01	0.251	0.242	0.915	PATHOGENIC
Chr20(GRCh37):g.50405509T>C	DDD	BENIGN	0.07	0.986	0.136	0.719	PATHOGENIC
Chr20(GRCh37):g.50405536T>G	DDD	BENIGN	0.02	0.985	0.274	0.951	PATHOGENIC
Chr20(GRCh37):g.52779298C>A	Amish	BENIGN	0.007	1	0.545	0.964	PATHOGENIC
Chr20(GRCh37):g.57428716G>T	DDD	BENIGN	0.01	0.037	0.242	0.072	BENIGN
Chr20(GRCh37):g.57428717G>C	DDD	BENIGN	0	0.543	0.158	0.168	Benign
Chr20(GRCh37):g.57429583C>A	DDD	BENIGN	0.12	0.001	0.182	0.132	BENIGN
Chr20(GRCh37):g.57429728G>A	DDD	BENIGN	0.09	0.461	0.27	0.659	PATHOGENIC
Chr20(GRCh37):g.57470690A>G	DDD	PATHOGENIC	0	0.632	0.922	0.999	PATHOGENIC
Chr20(GRCh37):g.57478731T>C	DDD	PATHOGENIC	0	1	0.924	0.998	PATHOGENIC
Chr20(GRCh37):g.57484607C>T	DDD	PATHOGENIC	0.01	0.999	0.857	1	PATHOGENIC
Chr20(GRCh37):g.57484795G>C	DDD	PATHOGENIC	0	0.999	0.917	0.999	PATHOGENIC
Chr20(GRCh37):g.57485013C>T	DDD	BENIGN	0	0.997	0.716	0.999	PATHOGENIC
Chr20(GRCh37):g.61467618C>G	DDD	BENIGN	0.19	0.265	0.348	0.535	PATHOGENIC
Chr20(GRCh37):g.61981084A>G	DDD	BENIGN	0.03	0.837	0.69	0.987	PATHOGENIC
Chr20(GRCh37):g.61982233A>G	DDD	BENIGN	0	0.997	0.924	0.999	PATHOGENIC
Chr20(GRCh37):g.61992493G>A	DDD	BENIGN	0.13	0	0.128	0.045	BENIGN
Chr20(GRCh37):g.62044885G>A	DDD	PATHOGENIC	0.01	1	0.875	0.999	PATHOGENIC
Chr20(GRCh37):g.62045460C>T	DDD	BENIGN	0.04	0.478	0.563	0.874	PATHOGENIC
Chr20(GRCh37):g.62069997G>A	DDD	PATHOGENIC	0	0.999	0.839	1	Pathogenic
Chr20(GRCh37):g.62070004G>A	DDD	PATHOGENIC	0	0.971	0.937	0.996	Pathogenic
Chr20(GRCh37):g.62070961G>A	DDD	PATHOGENIC	0.02	0.841	0.897	0.999	PATHOGENIC
Chr20(GRCh37):g.62070967A>G	DDD	PATHOGENIC	0	0.95	0.827	0.999	PATHOGENIC
Chr20(GRCh37):g.62071005C>A	DDD	PATHOGENIC	0.02	0.21	0.757	0.995	PATHOGENIC
Chr20(GRCh37):g.62071009C>T	DDD	PATHOGENIC	0	0.987	0.982	0.999	PATHOGENIC
Chr20(GRCh37):g.62071018G>A	DDD	PATHOGENIC	0	0.979	0.973	1	PATHOGENIC
Chr20(GRCh37):g.62071024G>C	ACMG	PATHOGENIC	0	1	0.965	1	PATHOGENIC
Chr20(GRCh37):g.62071028A>G	DDD	PATHOGENIC	0.04	0.914	0.803	0.888	PATHOGENIC
Chr20(GRCh37):g.62071032G>C	DDD	PATHOGENIC	0	0.906	0.918	0.991	PATHOGENIC
Chr20(GRCh37):g.62071037C>T	DDD	PATHOGENIC	0.02	0.994	0.961	0.999	Pathogenic
Chr20(GRCh37):g.62073782C>T	DDD	PATHOGENIC	0	0.588	0.836	0.983	Pathogenic
Chr20(GRCh37):g.62073787G>A	DDD	PATHOGENIC	0	0.015	0.857	0.995	PATHOGENIC
Chr20(GRCh37):g.62076019T>C	DDD	PATHOGENIC	0	0.928	0.944	0.995	PATHOGENIC
Chr20(GRCh37):g.62076061C>T	DDD	PATHOGENIC	0	0.999	0.742	0.977	PATHOGENIC
Chr20(GRCh37):g.62076101G>A	DDD	PATHOGENIC	0	0.998	0.931	0.999	PATHOGENIC
Chr20(GRCh37):g.62076674C>T	DDD	PATHOGENIC	0.01	0.999	0.947	0.999	PATHOGENIC
Chr20(GRCh37):g.62076675G>A	DDD	PATHOGENIC	0	1	0.874	0.998	PATHOGENIC
Chr20(GRCh37):g.62076675G>C	DDD	PATHOGENIC	0	0.999	0.842	0.998	PATHOGENIC
Chr20(GRCh37):g.62078167A>T	DDD	PATHOGENIC	0	0.62	0.94	0.996	PATHOGENIC
Chr20(GRCh37):g.62127262C>T	DDD	PATHOGENIC	0.02	0.972	0.904	0.999	Pathogenic
Chr21(GRCh37):g.37833740A>T	ACMG	PATHOGENIC	0	0.989	0.947	0.996051	Pathogenic
Chr21(GRCh37):g.38858872T>C	DDD	PATHOGENIC	0	1	0.833	0.999	PATHOGENIC
Chr21(GRCh37):g.38862641G>C	DDD	PATHOGENIC	0.03	0.95	0.575	0.965	PATHOGENIC
Chr21(GRCh37):g.38862672A>T	DDD	PATHOGENIC	0	1	0.959	1	PATHOGENIC
Chr21(GRCh37):g.38865395A>T	DDD	PATHOGENIC	0	1	0.889	1	PATHOGENIC
Chr21(GRCh37):g.38865403T>C	DDD	PATHOGENIC	0	0.999	0.786	1	PATHOGENIC
Chr21(GRCh37):g.38877746G>A	DDD	PATHOGENIC	0.01	0.998	0.863	0.999	PATHOGENIC
Chr21(GRCh37):g.44592215G>A	DDD	PATHOGENIC	0	0.999	0.956	1	PATHOGENIC
Chr21(GRCh37):g.44592365A>G	DDD	BENIGN	0.25	0.863	0.531	0.703	PATHOGENIC
Chr21(GRCh37):g.44838346G>C	DDD	BENIGN	0.06	0.1	0.098	0.766	Benign
Chr21(GRCh37):g.46908356A>C	DDD	BENIGN	0.06	0.092	0.217	0.282	PATHOGENIC
Chr21(GRCh37):g.47406862C>T	DDD	BENIGN	0.04	0.884	0.617	0.47	Benign
Chr21(GRCh37):g.47409531G>A	DDD	PATHOGENIC	0	1	0.981	1	PATHOGENIC
Chr21(GRCh37):g.47417620A>G	DDD	BENIGN	0.08	0.003	0.247	0.935	PATHOGENIC
Chr21(GRCh37):g.47421174G>T	DDD	BENIGN	0.02	0.074	0.163	0.811	PATHOGENIC
Chr21(GRCh37):g.47421288C>A	DDD	BENIGN	0.17	0.974	0.464	0.967	PATHOGENIC
Chr21(GRCh37):g.47776985A>G	DDD	BENIGN	0.25	0.012	0.026	0.019	Benign
Chr22(GRCh37):g.21344765G>A	ACMG	PATHOGENIC	0	0.966	0.839	0.998	Pathogenic
Chr22(GRCh37):g.24159112G>A	DDD	BENIGN	0.43	0.742	0.365	0.785	PATHOGENIC
Chr22(GRCh37):g.24175868C>T	DDD	PATHOGENIC	0	0.991	0.869	0.997	PATHOGENIC
Chr22(GRCh37):g.24175872A>G	DDD	PATHOGENIC	0.01	0.372	0.88	0.996	PATHOGENIC
Chr22(GRCh37):g.24718125G>A	DDD	BENIGN	0	0.992	0.374	0.912	PATHOGENIC
Chr22(GRCh37):g.24718518G>A	DDD	PATHOGENIC	0	0.971	0.443	0.993	PATHOGENIC
Chr22(GRCh37):g.24730379C>G	DDD	BENIGN	0.2	0.9	0.118	0.696	PATHOGENIC
Chr22(GRCh37):g.26168388C>T	ACMG	PATHOGENIC	0	1	0.817	0.993	Pathogenic
Chr22(GRCh37):g.27019300A>G	DDD	BENIGN	0.01	0.402	0.654	0.962	PATHOGENIC
Chr22(GRCh37):g.32289627G>A	DDD	BENIGN	0	0.989	0.324	0.994	PATHOGENIC
Chr22(GRCh37):g.32302041T>C	DDD	BENIGN	0	0.977	0.376	0.98	PATHOGENIC
Chr22(GRCh37):g.32464529G>A	ACMG	PATHOGENIC	0	0.999	0.928	0.972	Pathogenic
Chr22(GRCh37):g.32495289T>C	ACMG	PATHOGENIC	0	0.93	0.922	0.949	Pathogenic
Chr22(GRCh37):g.32498017T>G	ACMG	PATHOGENIC	0	0.941	0.672	0.996	PATHOGENIC
Chr22(GRCh37):g.36680187G>A	DDD	BENIGN	0.01	0.738	0.383	0.437	Benign
Chr22(GRCh37):g.36680211C>T	DDD	BENIGN	0.04	0.476	0.487	0.995	PATHOGENIC
Chr22(GRCh37):g.36681953C>T	DDD	BENIGN	0.01	0.963	0.744	0.896	Pathogenic
Chr22(GRCh37):g.36690281C>T	DDD	BENIGN	0.05	0.895	0.844	0.99	PATHOGENIC
Chr22(GRCh37):g.36700143A>C	DDD	BENIGN	0	1	0.93	1	PATHOGENIC
Chr22(GRCh37):g.36710237C>T	DDD	BENIGN	0	0.979	0.77	0.998	PATHOGENIC
Chr22(GRCh37):g.38379397G>A	ACMG	PATHOGENIC	0	0.998	0.966	0.992	PATHOGENIC
Chr22(GRCh37):g.38516874T>G	DDD	PATHOGENIC	0	0.929	0.904	0.992	PATHOGENIC
Chr22(GRCh37):g.41527512A>T	DDD	PATHOGENIC	0.04	0.913	0.58	0.97	PATHOGENIC
Chr22(GRCh37):g.41560092A>G	DDD	PATHOGENIC	0	0.991	0.958	0.998	PATHOGENIC
Chr22(GRCh37):g.41562653A>G	DDD	PATHOGENIC	0	0.985	0.608	0.996	PATHOGENIC
Chr22(GRCh37):g.41572254T>G	DDD	PATHOGENIC	0	0.997	0.953	0.995	PATHOGENIC
Chr22(GRCh37):g.41572477C>G	DDD	BENIGN	0.03	0.994	0.772	0.97	PATHOGENIC
Chr22(GRCh37):g.41573186A>C	DDD	PATHOGENIC	0	0.637	0.675	0.974	PATHOGENIC
Chr22(GRCh37):g.41573743A>G	DDD	BENIGN	0.1	0.063	0.502	0.724	PATHOGENIC
ChrX(GRCh37):g.2852911G>A	ACMG	PATHOGENIC	0.04	0.973	0.785	0.898	Pathogenic
ChrX(GRCh37):g.2873509C>A	ACMG	PATHOGENIC	0	0.806	0.494	0.92	PATHOGENIC
ChrX(GRCh37):g.10427733T>A	ACMG	PATHOGENIC	0	1	0.573	0.999	PATHOGENIC
ChrX(GRCh37):g.11136667A>G	DDD	BENIGN	0.26	0.992	0.462	0.842	Benign
ChrX(GRCh37):g.14863151G>A	DDD	BENIGN	0.04	0.787	0.188	0.981	PATHOGENIC
ChrX(GRCh37):g.15349697C>T	DDD	PATHOGENIC	0	0.41	0.669	0.99	PATHOGENIC
ChrX(GRCh37):g.15349757T>C	DDD	BENIGN	0.12	0.999	0.472	0.954	PATHOGENIC
ChrX(GRCh37):g.15349760T>G	DDD	PATHOGENIC	0.01	0.991	0.784	0.993	PATHOGENIC
ChrX(GRCh37):g.17705978C>T	DDD	BENIGN	0.01	0.942	0.21	0.991	PATHOGENIC
ChrX(GRCh37):g.17743467A>T	DDD	BENIGN	0.01	0.999	0.456	0.986	PATHOGENIC
ChrX(GRCh37):g.17743609A>T	DDD	BENIGN	0.09	0.996	0.301	0.95	PATHOGENIC
ChrX(GRCh37):g.17744489A>G	DDD	BENIGN	0.05	0.051	0.121	0.907	PATHOGENIC
ChrX(GRCh37):g.17745785A>G	DDD	BENIGN	0.04	0.84	0.117	0.849	PATHOGENIC
ChrX(GRCh37):g.18582601C>T	DDD	PATHOGENIC	0	0.971	0.365	0.996	PATHOGENIC
ChrX(GRCh37):g.18602436G>A	DDD	PATHOGENIC	0	0.999	0.711	0.996	PATHOGENIC
ChrX(GRCh37):g.18602452G>C	DDD	PATHOGENIC	0	0.999	0.712	1	PATHOGENIC
ChrX(GRCh37):g.18606112G>A	DDD	PATHOGENIC	0	1	0.9	1	PATHOGENIC
ChrX(GRCh37):g.18606145C>G	DDD	PATHOGENIC	0	0.994	0.654	0.999	PATHOGENIC
ChrX(GRCh37):g.19371211G>A	DDD	PATHOGENIC	0	0.999	0.97	0.999	PATHOGENIC
ChrX(GRCh37):g.19371236C>T	DDD	PATHOGENIC	0	1	0.927	1	PATHOGENIC
ChrX(GRCh37):g.20185822A>G	DDD	BENIGN	0	0.789	0.675	0.994	PATHOGENIC
ChrX(GRCh37):g.20190934A>G	DDD	PATHOGENIC	0	0.851	0.597	0.997	PATHOGENIC
ChrX(GRCh37):g.21985430G>A	DDD	PATHOGENIC	0.16	0.026	0.627	0.916	PATHOGENIC
ChrX(GRCh37):g.21995184C>T	DDD	PATHOGENIC	0.04	1	0.787	0.998	PATHOGENIC
ChrX(GRCh37):g.22208575C>T	ACMG	PATHOGENIC	0.01	0.999	0.925	0.996	Pathogenic
ChrX(GRCh37):g.22244589T>G	ACMG	PATHOGENIC	0	0.999	0.81	0.999	PATHOGENIC
ChrX(GRCh37):g.22244602G>A	ACMG	PATHOGENIC	0	1	0.966	1	PATHOGENIC
ChrX(GRCh37):g.22266011T>A	ACMG	PATHOGENIC	0	0.999	0.949	1	PATHOGENIC
ChrX(GRCh37):g.25022981C>G	DDD	BENIGN	0.01	0.999	0.614	0.981	PATHOGENIC
ChrX(GRCh37):g.32408267A>G	DDD	BENIGN	0.21	0.039	0.053	0.668	PATHOGENIC
ChrX(GRCh37):g.32509463G>C	DDD	BENIGN	0.27	0.037	0.088	0.811	PATHOGENIC
ChrX(GRCh37):g.32591705A>C	DDD	BENIGN	0	0.879	0.45	0.365	Benign
ChrX(GRCh37):g.32716090T>C	DDD	BENIGN	0.18	0.753	0.115	0.399	PATHOGENIC
ChrX(GRCh37):g.32841501C>T	DDD	BENIGN	0.01	0.685	0.497	0.924	PATHOGENIC
ChrX(GRCh37):g.39921415G>A	DDD	BENIGN	0	0.999	0.389	0.99	PATHOGENIC
ChrX(GRCh37):g.39922912C>G	DDD	BENIGN	0.05	0.779	0.116	0.508	PATHOGENIC
ChrX(GRCh37):g.39932467G>A	DDD	BENIGN	0.05	0.164	0.088	0.906	PATHOGENIC
ChrX(GRCh37):g.39934025C>G	DDD	BENIGN	0.15	0.382	0.138	0.544	PATHOGENIC
ChrX(GRCh37):g.40999973G>A	DDD	BENIGN	0	0.999	0.487	0.997	PATHOGENIC
ChrX(GRCh37):g.41069824T>G	DDD	PATHOGENIC	0	0.999	0.605	0.998	PATHOGENIC
ChrX(GRCh37):g.41202566T>C	DDD	PATHOGENIC	0	0.999	0.706	0.995	PATHOGENIC
ChrX(GRCh37):g.41204533C>T	DDD	PATHOGENIC	0	0.979	0.474	1	Pathogenic
ChrX(GRCh37):g.41205861G>A	DDD	PATHOGENIC	0	0.883	0.947	0.999	PATHOGENIC
ChrX(GRCh37):g.41333728A>C	DDD	PATHOGENIC	0	0.895	0.88	0.983	PATHOGENIC
ChrX(GRCh37):g.41333941G>T	DDD	BENIGN	0.05	0.635	0.16	0.841	PATHOGENIC
ChrX(GRCh37):g.41412993G>A	DDD	PATHOGENIC	0	1	0.959	1	PATHOGENIC
ChrX(GRCh37):g.41413137G>A	DDD	PATHOGENIC	0	0.998	0.479	1	PATHOGENIC
ChrX(GRCh37):g.41419069A>G	DDD	BENIGN	0	0.986	0.65	0.995	PATHOGENIC
ChrX(GRCh37):g.41495850T>A	DDD	PATHOGENIC	0	1	0.759	0.999	PATHOGENIC
ChrX(GRCh37):g.41530728C>T	DDD	PATHOGENIC	0.17	1	0.409	0.989	PATHOGENIC
ChrX(GRCh37):g.41598639T>C	DDD	PATHOGENIC	0.02	0.299	0.797	0.982	PATHOGENIC
ChrX(GRCh37):g.41646533A>C	DDD	PATHOGENIC	0	0.995	0.643	0.996	PATHOGENIC
ChrX(GRCh37):g.41712463A>G	DDD	BENIGN	0	0.862	0.783	0.978	PATHOGENIC
ChrX(GRCh37):g.43515634C>A	DDD	BENIGN	0.06	0.842	0.253	0.966	PATHOGENIC
ChrX(GRCh37):g.43542820C>T	DDD	PATHOGENIC	0	0.999	0.934	1	PATHOGENIC
ChrX(GRCh37):g.44732857T>G	DDD	BENIGN	0	0.489	0.317	0.97	PATHOGENIC
ChrX(GRCh37):g.44820637G>C	ACMG	PATHOGENIC	0	0.944	0.49	0.993	PATHOGENIC
ChrX(GRCh37):g.44913200G>A	DDD	BENIGN	0	0.997	0.354	0.987	PATHOGENIC
ChrX(GRCh37):g.44929589C>G	DDD	BENIGN	0.09	0.997	0.401	0.906	PATHOGENIC
ChrX(GRCh37):g.44949107G>A	DDD	PATHOGENIC	0	1	0.917	0.999	PATHOGENIC
ChrX(GRCh37):g.47435567G>A	DDD	BENIGN	0.04	0.897	0.319	0.985	PATHOGENIC
ChrX(GRCh37):g.47464462G>A	DDD	PATHOGENIC	0	0.929	0.343	0.987	PATHOGENIC
ChrX(GRCh37):g.48336499C>T	DDD	PATHOGENIC	0	1	0.492	1	PATHOGENIC
ChrX(GRCh37):g.48371230C>T	DDD	BENIGN	0.01	0.83	0.372	0.908	PATHOGENIC
ChrX(GRCh37):g.48385557C>G	ACMG	PATHOGENIC	0	0.867	0.632	0.951	PATHOGENIC
ChrX(GRCh37):g.48386646A>C	ACMG	PATHOGENIC	0	0.996	0.901	0.997	PATHOGENIC
ChrX(GRCh37):g.48386766T>C	DDD	PATHOGENIC	0.03	0.694	0.763	0.931	PATHOGENIC
ChrX(GRCh37):g.48759755C>T	DDD	BENIGN	0	0.99	0.435	0.998	PATHOGENIC
ChrX(GRCh37):g.48760320C>T	DDD	BENIGN	0	0.993	0.741	0.997	PATHOGENIC
ChrX(GRCh37):g.49048097C>T	DDD	BENIGN	0.33	0.766	0.333	0.583	PATHOGENIC
ChrX(GRCh37):g.49108163T>C	ACMG	PATHOGENIC	0	0.421	0.671	0.921	Pathogenic
ChrX(GRCh37):g.49110464G>C	DDD	BENIGN	0.08	0.003	0.254	0.115	BENIGN
ChrX(GRCh37):g.49113938G>T	DDD	BENIGN	0	0.476	0.487	0.642	PATHOGENIC
ChrX(GRCh37):g.51487224G>A	DDD	BENIGN	0.03	0.776	0.18	0.419	BENIGN
ChrX(GRCh37):g.53223640G>A	DDD	PATHOGENIC	0.31	0.146	0.066	0.594	PATHOGENIC
ChrX(GRCh37):g.53239931C>T	DDD	PATHOGENIC	0	1	0.753	0.998	PATHOGENIC
ChrX(GRCh37):g.53239933T>C	DDD	PATHOGENIC	0	1	0.837	1	PATHOGENIC
ChrX(GRCh37):g.53265543C>G	DDD	PATHOGENIC	0	0.361	0.276	0.78	PATHOGENIC
ChrX(GRCh37):g.53270970A>G	DDD	PATHOGENIC	0.01	0.999	0.869	0.998	PATHOGENIC
ChrX(GRCh37):g.53276262T>G	DDD	PATHOGENIC	0	0.996	0.719	0.998	PATHOGENIC
ChrX(GRCh37):g.53277371G>A	DDD	PATHOGENIC	0	0.999	0.868	1	BENIGN
ChrX(GRCh37):g.53432045G>A	DDD	PATHOGENIC	0	0.891	0.599	0.964	PATHOGENIC
ChrX(GRCh37):g.53438773G>C	DDD	PATHOGENIC	0.19	0.991	0.742	0.956	PATHOGENIC
ChrX(GRCh37):g.53439121C>T	DDD	PATHOGENIC	0.08	0.087	0.437	0.978	PATHOGENIC
ChrX(GRCh37):g.53440063T>C	DDD	BENIGN	0.03	0.725	0.711	0.988	PATHOGENIC
ChrX(GRCh37):g.53440208T>C	DDD	PATHOGENIC	0	0.978	0.704	0.986	PATHOGENIC
ChrX(GRCh37):g.53440211G>A	DDD	PATHOGENIC	0.02	0.999	0.807	1	PATHOGENIC
ChrX(GRCh37):g.53441723T>A	DDD	PATHOGENIC	0	1	0.67	1	PATHOGENIC
ChrX(GRCh37):g.53563449T>C	DDD	PATHOGENIC	0	0.999	0.641	0.997	PATHOGENIC
ChrX(GRCh37):g.53574700A>T	DDD	PATHOGENIC	0.6	0.011	0.036	0.07	BENIGN
ChrX(GRCh37):g.53578253C>T	DDD	PATHOGENIC	0	0.992	0.591	0.994	PATHOGENIC
ChrX(GRCh37):g.53600755A>C	DDD	PATHOGENIC	0	0.948	0.293	0.905	PATHOGENIC
ChrX(GRCh37):g.53617414T>C	DDD	BENIGN	0.02	0.009	0.239	0.713	PATHOGENIC
ChrX(GRCh37):g.53634551T>G	DDD	BENIGN	0	0.516	0.294	0.989	PATHOGENIC
ChrX(GRCh37):g.53642747A>C	DDD	BENIGN	0.05	0.999	0.825	0.993	PATHOGENIC
ChrX(GRCh37):g.54040973G>A	DDD	BENIGN	0	0.998	0.786	0.999	PATHOGENIC
ChrX(GRCh37):g.54481903G>A	ACMG	PATHOGENIC	0	0.993	0.695	0.993	PATHOGENIC
ChrX(GRCh37):g.54481917A>C	ACMG	PATHOGENIC	0	0.954	0.887	0.995	PATHOGENIC
ChrX(GRCh37):g.54491916G>A	ACMG	PATHOGENIC	0	0.969	0.623	0.999	PATHOGENIC
ChrX(GRCh37):g.54491956G>A	ACMG	PATHOGENIC	0	1	0.904	1	Pathogenic
ChrX(GRCh37):g.54491964C>T	ACMG	PATHOGENIC	0	0.999	0.967	1	Pathogenic
ChrX(GRCh37):g.54492000A>T	ACMG	PATHOGENIC	0	0.972	0.852	0.998	PATHOGENIC
ChrX(GRCh37):g.54521591G>C	DDD	BENIGN	0	0.069	0.09	0.552	PATHOGENIC
ChrX(GRCh37):g.64137701G>A	DDD	PATHOGENIC	0	0.993	0.374	0.998	PATHOGENIC
ChrX(GRCh37):g.64137751A>G	DDD	PATHOGENIC	0	0.987	0.692	0.996	PATHOGENIC
ChrX(GRCh37):g.64141712G>T	DDD	PATHOGENIC	0	0.996	0.436	0.993	PATHOGENIC
ChrX(GRCh37):g.66905947G>A	DDD	BENIGN	0.03	0.996	0.715	0.907	PATHOGENIC
ChrX(GRCh37):g.67316803A>G	DDD	PATHOGENIC	0	1	0.637	1	PATHOGENIC
ChrX(GRCh37):g.67652736C>G	DDD	PATHOGENIC	0	0.999	0.559	0.998	PATHOGENIC
ChrX(GRCh37):g.68060403A>G	DDD	BENIGN	0	0.996	0.929	0.996	BENIGN
ChrX(GRCh37):g.68060451A>G	DDD	BENIGN	0	0.985	0.83	0.99	PATHOGENIC
ChrX(GRCh37):g.70339264C>G	DDD	PATHOGENIC	0.01	0.854	0.18	0.886	PATHOGENIC
ChrX(GRCh37):g.70339624A>G	DDD	PATHOGENIC	0.06	0.497	0.215	0.611	PATHOGENIC
ChrX(GRCh37):g.70349262A>G	DDD	BENIGN	0	0.993	0.482	0.99	PATHOGENIC
ChrX(GRCh37):g.70349949T>A	DDD	PATHOGENIC	0.02	0.987	0.706	0.974	PATHOGENIC
ChrX(GRCh37):g.70352373G>A	DDD	BENIGN	0.01	0.946	0.183	0.994	PATHOGENIC
ChrX(GRCh37):g.70354667G>A	DDD	PATHOGENIC	0	0.974	0.395	0.99	PATHOGENIC
ChrX(GRCh37):g.70387349G>A	DDD	BENIGN	0.23	0.348	0.479	0.916	PATHOGENIC
ChrX(GRCh37):g.70586341T>G	DDD	BENIGN	0	0.197	0.254	0.988	PATHOGENIC
ChrX(GRCh37):g.70595092C>A	DDD	BENIGN	0.05	0.54	0.093	0.809	PATHOGENIC
ChrX(GRCh37):g.70608626C>T	DDD	PATHOGENIC	0	1	0.395	1	PATHOGENIC
ChrX(GRCh37):g.70627912G>A	DDD	PATHOGENIC	0	0.997	0.454	0.998	PATHOGENIC
ChrX(GRCh37):g.70643914A>G	DDD	PATHOGENIC	0.02	0.012	0.192	0.981	PATHOGENIC
ChrX(GRCh37):g.70674631C>T	DDD	BENIGN	0.16	0.063	0.086	0.896	PATHOGENIC
ChrX(GRCh37):g.70683789C>T	DDD	PATHOGENIC	0	0.742	0.218	0.717	Pathogenic
ChrX(GRCh37):g.71571623A>T	DDD	PATHOGENIC	0.02	0.661	0.622	0.998	PATHOGENIC
ChrX(GRCh37):g.71684459C>T	DDD	PATHOGENIC	0	0.997	0.788	1	PATHOGENIC
ChrX(GRCh37):g.71684483A>C	DDD	PATHOGENIC	0	0.29	0.799	0.996	PATHOGENIC
ChrX(GRCh37):g.71708853G>A	DDD	PATHOGENIC	0	0.973	0.713	0.998	PATHOGENIC
ChrX(GRCh37):g.71708867C>T	DDD	PATHOGENIC	0	1	0.884	0.999	PATHOGENIC
ChrX(GRCh37):g.71710788A>G	DDD	PATHOGENIC	0.03	0.986	0.733	0.996	PATHOGENIC
ChrX(GRCh37):g.71715077A>G	DDD	PATHOGENIC	0	0.997	0.871	1	PATHOGENIC
ChrX(GRCh37):g.71715108A>G	DDD	PATHOGENIC	0.01	0.972	0.868	0.997	PATHOGENIC
ChrX(GRCh37):g.71792556A>C	DDD	PATHOGENIC	0	0.499	0.674	0.995	PATHOGENIC
ChrX(GRCh37):g.73744208G>A	DDD	PATHOGENIC	0.06	0.953	0.301	0.968	PATHOGENIC
ChrX(GRCh37):g.73959986C>T	DDD	PATHOGENIC	0.05	0.999	0.276	0.416	Benign
ChrX(GRCh37):g.76776348G>A	DDD	BENIGN	0.02	0.906	0.603	0.942	PATHOGENIC
ChrX(GRCh37):g.76813089G>A	ACMG	PATHOGENIC	0	0.999	0.904	1	PATHOGENIC
ChrX(GRCh37):g.76814235C>T	DDD	PATHOGENIC	0	0.999	0.61	0.98	PATHOGENIC
ChrX(GRCh37):g.76829787C>T	DDD	PATHOGENIC	0	0.999	0.845	1	PATHOGENIC
ChrX(GRCh37):g.76829788G>A	DDD	PATHOGENIC	0	1	0.883	1	PATHOGENIC
ChrX(GRCh37):g.76874449T>C	DDD	PATHOGENIC	0	0.99	0.949	1	PATHOGENIC
ChrX(GRCh37):g.76888706A>G	ACMG	PATHOGENIC	0	0.999	0.943	0.997	PATHOGENIC
ChrX(GRCh37):g.76889131G>A	DDD	PATHOGENIC	0	1	0.958	0.999	PATHOGENIC
ChrX(GRCh37):g.76907650C>T	DDD	PATHOGENIC	0.01	0.984	0.174	0.993	PATHOGENIC
ChrX(GRCh37):g.76937281G>C	DDD	BENIGN	0.02	0.894	0.521	0.9	PATHOGENIC
ChrX(GRCh37):g.76940012G>A	DDD	PATHOGENIC	0	0.995	0.972	0.997	PATHOGENIC
ChrX(GRCh37):g.76940061C>A	DDD	BENIGN	0	0.995	0.872	0.97	PATHOGENIC
ChrX(GRCh37):g.77267157T>G	DDD	BENIGN	0.01	0.511	0.837	0.989	PATHOGENIC
ChrX(GRCh37):g.79932309C>T	DDD	BENIGN	0.43	0.001	0.042	0.233	PATHOGENIC
ChrX(GRCh37):g.79939522T>A	DDD	PATHOGENIC	0	0.988	0.372	0.997	PATHOGENIC
ChrX(GRCh37):g.79980448C>T	DDD	BENIGN	0.08	0.618	0.195	0.853	PATHOGENIC
ChrX(GRCh37):g.84526118A>G	DDD	BENIGN	0.05	0.012	0.133	0.958	PATHOGENIC
ChrX(GRCh37):g.84526764A>G	DDD	BENIGN	0.11	0.001	0.044	0.411	Pathogenic
ChrX(GRCh37):g.99596963G>A	DDD	BENIGN	0.04	0.991	0.199	0.923	PATHOGENIC
ChrX(GRCh37):g.99662235G>T	DDD	BENIGN	0.02	0.73	0.248	0.888	Benign
ChrX(GRCh37):g.99662589A>C	DDD	PATHOGENIC	0	0.713	0.822	0.997	PATHOGENIC
ChrX(GRCh37):g.99663217G>A	DDD	PATHOGENIC	0	0.996	0.871	0.999	PATHOGENIC
ChrX(GRCh37):g.99917257T>C	DDD	BENIGN	0	0.999	0.678	0.578	Pathogenic
ChrX(GRCh37):g.99920544G>A	DDD	PATHOGENIC	0.05	0.697	0.189	0.389	Pathogenic
ChrX(GRCh37):g.100611042G>T	ACMG	PATHOGENIC	0	1	0.85	0.999	PATHOGENIC
ChrX(GRCh37):g.108902726A>C	DDD	PATHOGENIC	0	0.838	0.754	0.998	PATHOGENIC
ChrX(GRCh37):g.109937531T>C	DDD	BENIGN	0.02	0.419	0.055	0.848	PATHOGENIC
ChrX(GRCh37):g.110366369C>T	DDD	BENIGN	0.03	0.846	0.486	0.981	PATHOGENIC
ChrX(GRCh37):g.110644336C>T	ACMG	PATHOGENIC	0	0.449	0.931	0.998	Pathogenic
ChrX(GRCh37):g.110928268A>G	DDD	PATHOGENIC	0	0.093	0.277	0.978	Pathogenic
ChrX(GRCh37):g.110963382G>C	DDD	BENIGN	0.01	0.385	0.073	0.835	PATHOGENIC
ChrX(GRCh37):g.110971477A>G	DDD	BENIGN	0.39	0.367	0.036	0.398	Pathogenic
ChrX(GRCh37):g.118715550C>T	DDD	PATHOGENIC	0	0.813	0.767	0.999	PATHOGENIC
ChrX(GRCh37):g.118717136C>T	DDD	PATHOGENIC	0	0.999	0.701	0.996	PATHOGENIC
ChrX(GRCh37):g.119693941T>C	DDD	BENIGN	0	0.015	0.35	0.957	PATHOGENIC
ChrX(GRCh37):g.128699758T>G	DDD	PATHOGENIC	0.01	0.944	0.689	0.947	PATHOGENIC
ChrX(GRCh37):g.128957700G>A	DDD	PATHOGENIC	0	1	0.669	1	PATHOGENIC
ChrX(GRCh37):g.130412710G>A	DDD	BENIGN	0.01	0.998	0.175	0.732	PATHOGENIC
ChrX(GRCh37):g.131216472T>C	DDD	PATHOGENIC	0	1	0.97	0.998	PATHOGENIC
ChrX(GRCh37):g.132887582A>G	DDD	BENIGN	0	0.996	0.787	0.958	Benign
ChrX(GRCh37):g.133547953A>G	DDD	PATHOGENIC	0.14	0.966	0.847	0.959	PATHOGENIC
ChrX(GRCh37):g.133549128A>G	ACMG	PATHOGENIC	0	0.995	0.751	0.996	PATHOGENIC
ChrX(GRCh37):g.135098846T>C	DDD	PATHOGENIC	0.02	0.964	0.536	0.993	PATHOGENIC
ChrX(GRCh37):g.136649839G>C	ACMG	PATHOGENIC	0	0.999	0.888	1	PATHOGENIC
ChrX(GRCh37):g.139586876G>C	DDD	BENIGN	0.46	0	0.205	0.099	BENIGN
ChrX(GRCh37):g.147010283T>C	DDD	BENIGN	0	0.976	0.704	0.999	PATHOGENIC
ChrX(GRCh37):g.147743597G>C	DDD	BENIGN	0.02	0.966	0.231	0.872	PATHOGENIC
ChrX(GRCh37):g.147743603A>C	DDD	BENIGN	0.05	0.783	0.192	0.761	PATHOGENIC
ChrX(GRCh37):g.148579771G>C	DDD	BENIGN	0	0.999	0.86	0.863	Pathogenic
ChrX(GRCh37):g.148585769C>T	DDD	BENIGN	0	0.979	0.897	0.998	PATHOGENIC
ChrX(GRCh37):g.149638993C>T	DDD	BENIGN	0.01	0.98	0.29	0.946	PATHOGENIC
ChrX(GRCh37):g.149639436C>T	DDD	BENIGN	0.18	0.898	0.157	0.909	PATHOGENIC
ChrX(GRCh37):g.149680406A>G	DDD	BENIGN	0.43	0.001	0.061	0.026	BENIGN
ChrX(GRCh37):g.149767127C>T	ACMG	PATHOGENIC	0	0.997	0.852	0.992	Pathogenic
ChrX(GRCh37):g.149818202G>C	ACMG	PATHOGENIC	0	0.991	0.926	0.999	PATHOGENIC
ChrX(GRCh37):g.152036162A>G	DDD	BENIGN	0	0.932	0.898	0.99	PATHOGENIC
ChrX(GRCh37):g.152955868G>A	DDD	PATHOGENIC	0.01	0.969	0.685	0.972	PATHOGENIC
ChrX(GRCh37):g.152959802G>A	DDD	PATHOGENIC	0	1	0.95	1	PATHOGENIC
ChrX(GRCh37):g.152991575G>A	DDD	BENIGN	0	0.999	0.909	0.994	Benign
ChrX(GRCh37):g.152991617A>G	DDD	BENIGN	0	0.976	0.87	0.997	BENIGN
ChrX(GRCh37):g.153006093A>G	Amish	BENIGN	1	0	0.262	0.02	BENIGN
ChrX(GRCh37):g.153132309G>T	DDD	BENIGN	0.54	0.22	0.206	0.546	PATHOGENIC
ChrX(GRCh37):g.153134145G>A	DDD	PATHOGENIC	0	0.995	0.829	0.997	PATHOGENIC
ChrX(GRCh37):g.153141272T>C	DDD	BENIGN	0	0.283	0.331	0.577	PATHOGENIC
ChrX(GRCh37):g.153197526A>T	DDD	PATHOGENIC	0.05	0.737	0.75	0.981	Pathogenic
ChrX(GRCh37):g.153197551T>G	DDD	PATHOGENIC	0	0.916	0.447	0.989	PATHOGENIC
ChrX(GRCh37):g.153197563C>G	DDD	PATHOGENIC	0.01	0.947	0.599	0.997	PATHOGENIC
ChrX(GRCh37):g.153197863G>A	DDD	PATHOGENIC	0.03	0.875	0.581	0.998	Pathogenic
ChrX(GRCh37):g.153197865C>T	DDD	PATHOGENIC	0.02	1	0.697	1	PATHOGENIC
ChrX(GRCh37):g.153215855A>G	DDD	PATHOGENIC	0	0.989	0.631	0.997	PATHOGENIC
ChrX(GRCh37):g.153216268C>T	DDD	BENIGN	0	0.903	0.173	0.967	PATHOGENIC
ChrX(GRCh37):g.153222373G>A	DDD	PATHOGENIC	0	0.996	0.313	0.97	PATHOGENIC
ChrX(GRCh37):g.153222794G>A	DDD	BENIGN	0	0.992	0.422	0.986	PATHOGENIC
ChrX(GRCh37):g.153222831G>A	DDD	BENIGN	0.12	0.556	0.172	0.455	Benign
ChrX(GRCh37):g.153225531G>A	DDD	BENIGN	0.01	0.868	0.504	0.994	PATHOGENIC
ChrX(GRCh37):g.153225545C>G	DDD	PATHOGENIC	0	0.998	0.668	1	PATHOGENIC
ChrX(GRCh37):g.153296177G>A	DDD	BENIGN	0.18	0.097	0.406	0.155	Benign
ChrX(GRCh37):g.153296354G>A	DDD	PATHOGENIC	0	0.987	0.729	0.995	PATHOGENIC
ChrX(GRCh37):g.153296363G>A	DDD	PATHOGENIC	0.03	0.987	0.843	0.989	PATHOGENIC
ChrX(GRCh37):g.153296530C>T	DDD	BENIGN	0.08	0.994	0.556	0.991	PATHOGENIC
ChrX(GRCh37):g.153296806G>A	DDD	PATHOGENIC	0	0.999	0.945	0.998	Pathogenic
ChrX(GRCh37):g.153296824G>C	DDD	PATHOGENIC	0	0.976	0.943	0.99	PATHOGENIC
ChrX(GRCh37):g.153296882G>A	DDD	PATHOGENIC	0	0.999	0.986	0.999	Pathogenic
ChrX(GRCh37):g.153577315C>T	DDD	BENIGN	0	0.939	0.714	0.92	PATHOGENIC
ChrX(GRCh37):g.153579375A>G	DDD	PATHOGENIC	0	0.886	0.934	0.998	PATHOGENIC
ChrX(GRCh37):g.153588696G>A	DDD	PATHOGENIC	0.25	0.091	0.42	0.827	BENIGN
ChrX(GRCh37):g.153593016G>A	DDD	BENIGN	0.02	0.091	0.64	0.439	Pathogenic
ChrX(GRCh37):g.153596246G>A	DDD	PATHOGENIC	0	0.931	0.855	0.995	PATHOGENIC
ChrX(GRCh37):g.153761811C>G	ACMG	PATHOGENIC	0.01	0.958	0.877	0.146	Pathogenic
ChrX(GRCh37):g.153997488A>G	DDD	PATHOGENIC	0	0.041	0.502	0.997	PATHOGENIC
ChrX(GRCh37):g.154185348G>A	ACMG	PATHOGENIC	0	0.998	0.837	0.995	Pathogenic
